# Supplementary material for: Antitubercular evaluation of dihydropyridine–triazole conjugates: design, synthesis, in vitro screening, SAR and in silico ADME predictions
Source: Royal Society of Chemistry journal article supplement (doi:10.1039/d4md00377b), 2024-01-01

## **Antitubercular evaluation of dihydropyridine-triazole conjugates: Design, synthesis, in vitro screening, SAR and in silico ADME predictions**

Ajay Kishor kushawaha,<sup>a</sup> Arvind Kumar Jaiswal,<sup>a</sup> Jay Gupta,<sup>a</sup> Sarita Katiyar,<sup>a,e</sup> Alisha Ansari,<sup>a,e</sup> Hemlata Bhatt,<sup>a,e</sup> Sandeep K. Sharma,<sup>b</sup> Abhijit Deb Choudhury,<sup>c</sup> Rabi Sankar Bhatta,<sup>c,e</sup> Bhupendra N. Singh,<sup>b,e\*</sup> Koeni V. Sashidhara<sup>a,d,e\*</sup>

<sup>a</sup> Medicinal and Process Chemistry Division, CSIR-Central Drug Research Institute BS, 10/1, Sector 10, Jankipuram Extension, Sitapur Road, Lucknow 226031, India

<sup>b</sup> Molecular Microbiology & Immunology (MMI) Division, CSIR-Central Drug Research Institute BS 10/1, Sector 10, Jankipuram Extension, Sitapur Road, Lucknow 226031, India

<sup>c</sup>Pharmaceutics and Pharmacokinetics Division, CSIR- Central Drug Research Institute, Lucknow, India

<sup>d</sup> Sophisticated Analytical Instrument Facility & Research, CSIR-Central Drug Research Institute, BS-10/1, Sector 10, Jankipuram Extension, Sitapur Road, Lucknow 226031, U.P., India.

<sup>e</sup> Academy of Scientific and Innovative Research (AcSIR), Ghaziabad-201002, U.P., India.

\*Corresponding authors

Email: kv\_sashidhara@cdri.res.in, sashidhar123@gmail.com (Dr. K. V. Sashidhara), bnsingh@cdri.res.in (Dr Bhupendra N. Singh).

## Table of Contents

|                                                  |         |
|--------------------------------------------------|---------|
| NMR Spectra of compounds (H1-H2 and I1-I10)..... | S3-S14  |
| NMR Spectra of compounds (J1-J25 and K1-K7)..... | S15-S46 |
| HRMS Spectra of compounds.....                   | S47-S62 |

# NMR spectrum of compound H1

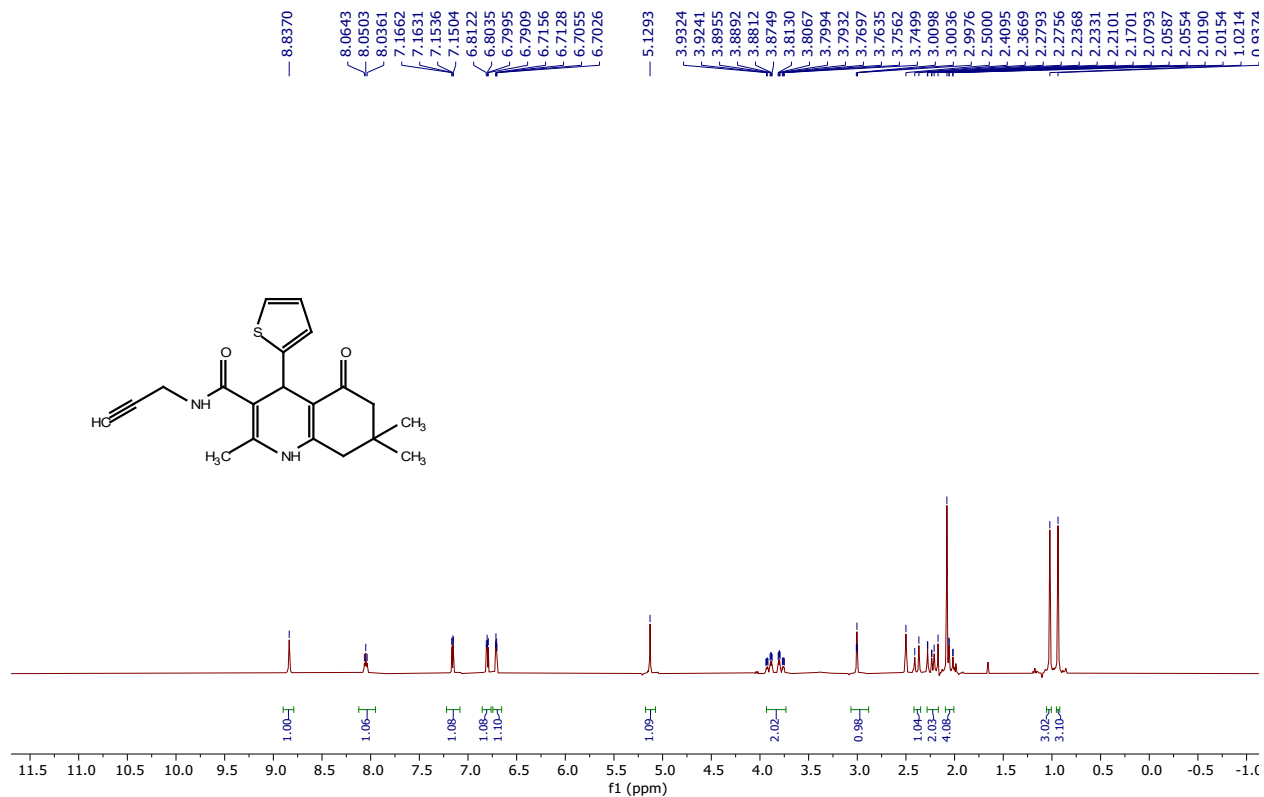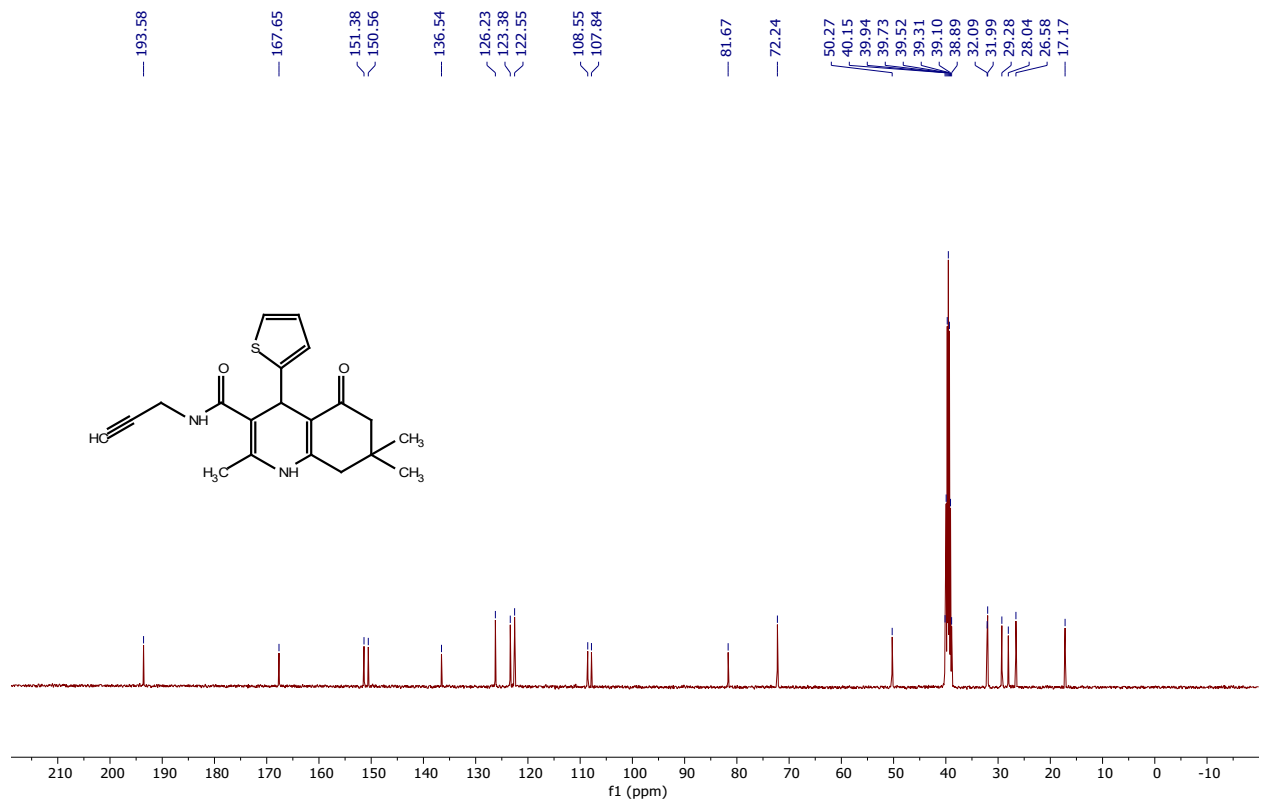

# NMR spectrum of compound H2

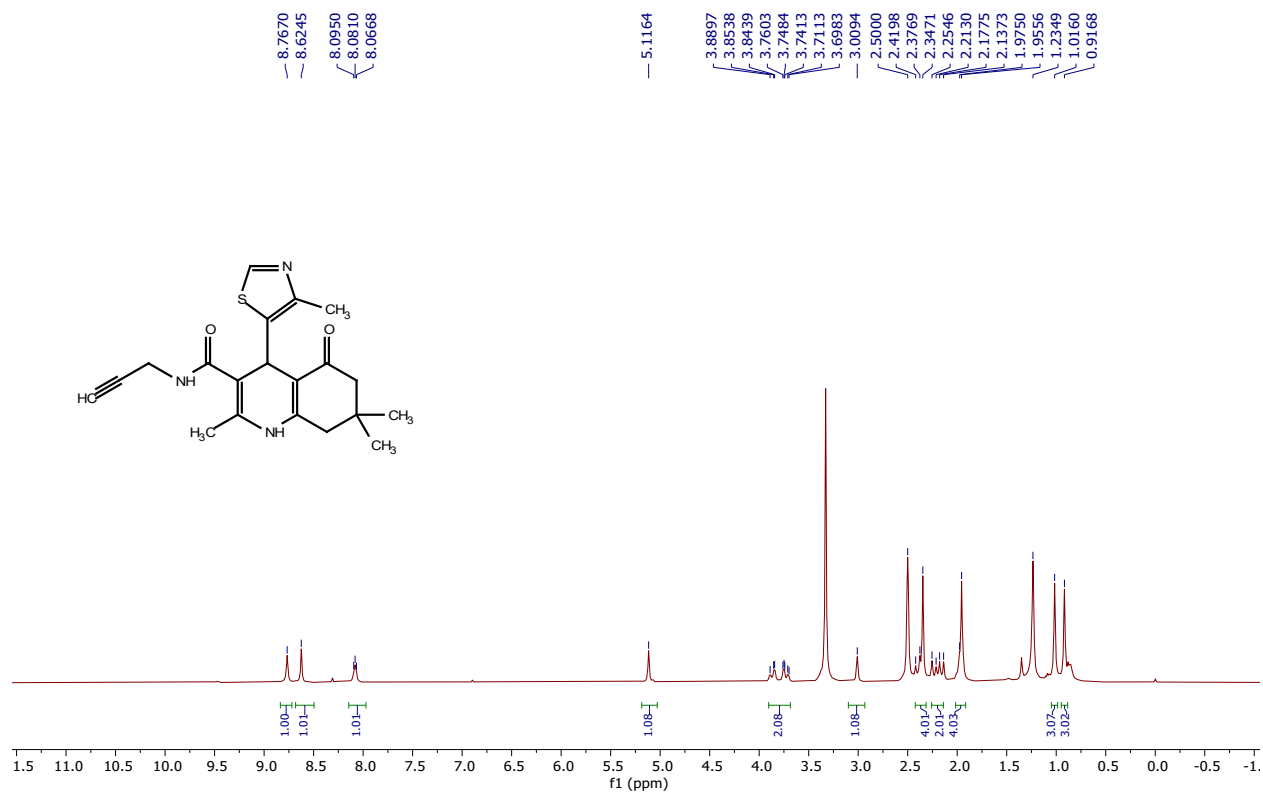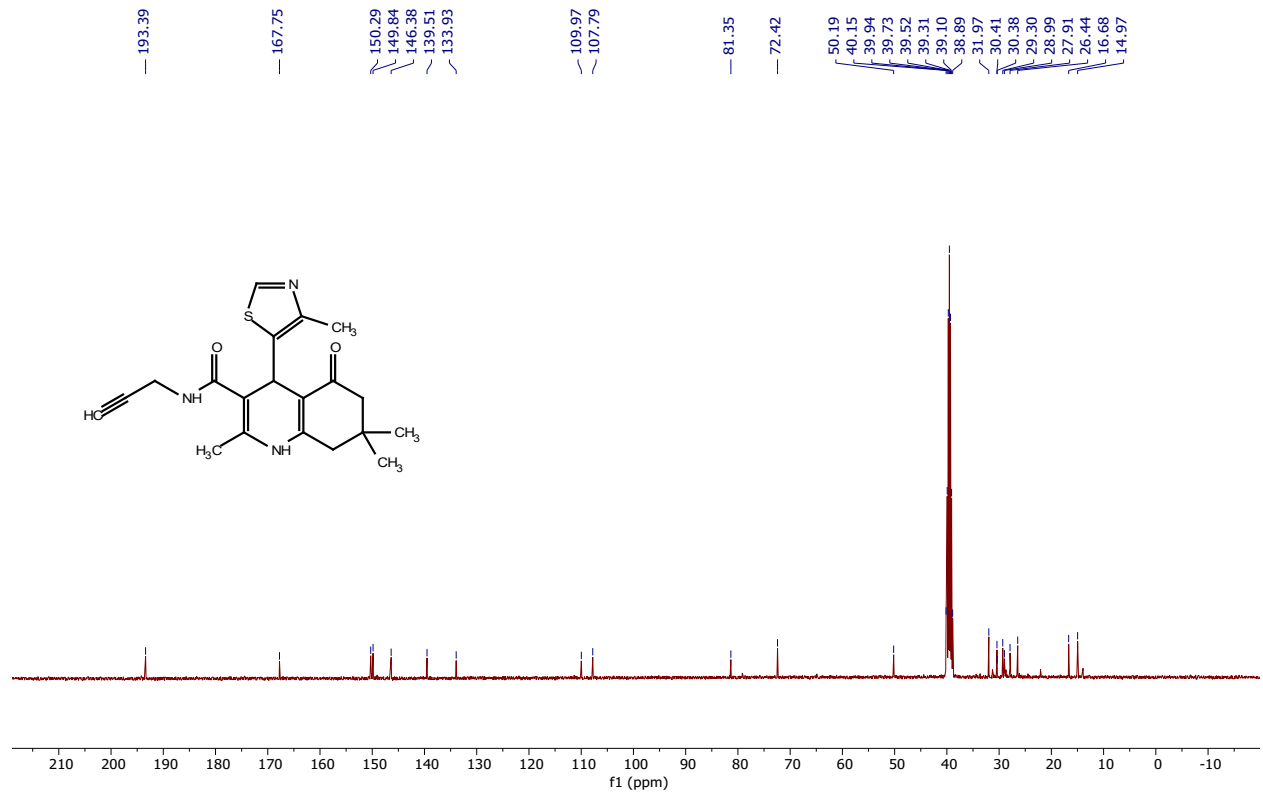

# NMR spectrum of compound I1

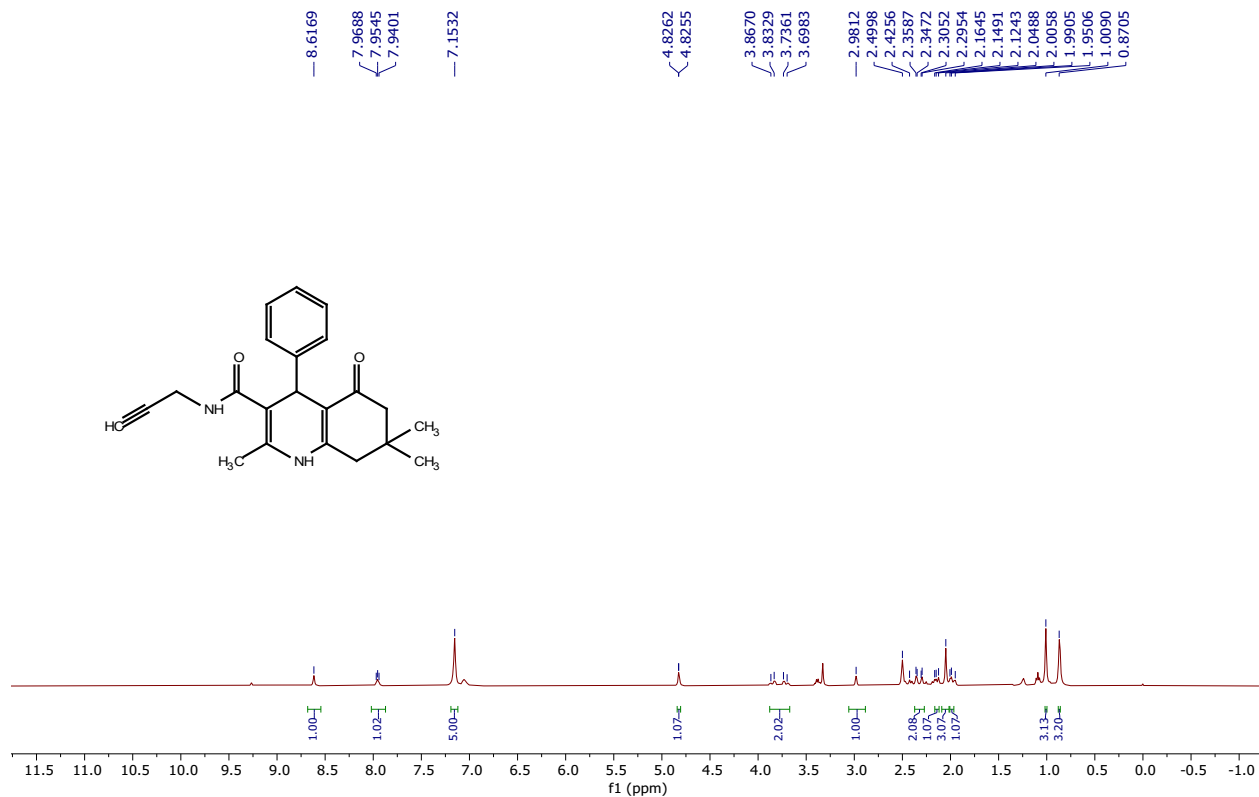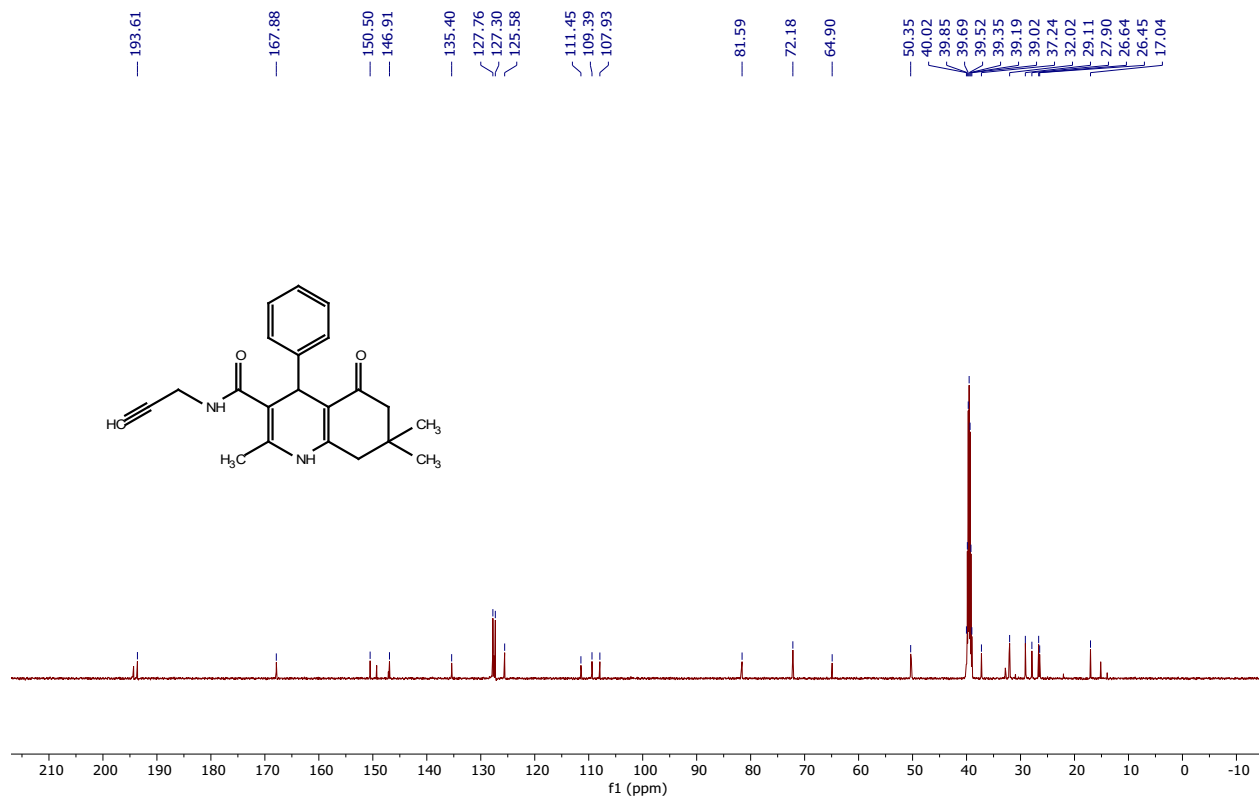

# NMR spectrum of compound I2

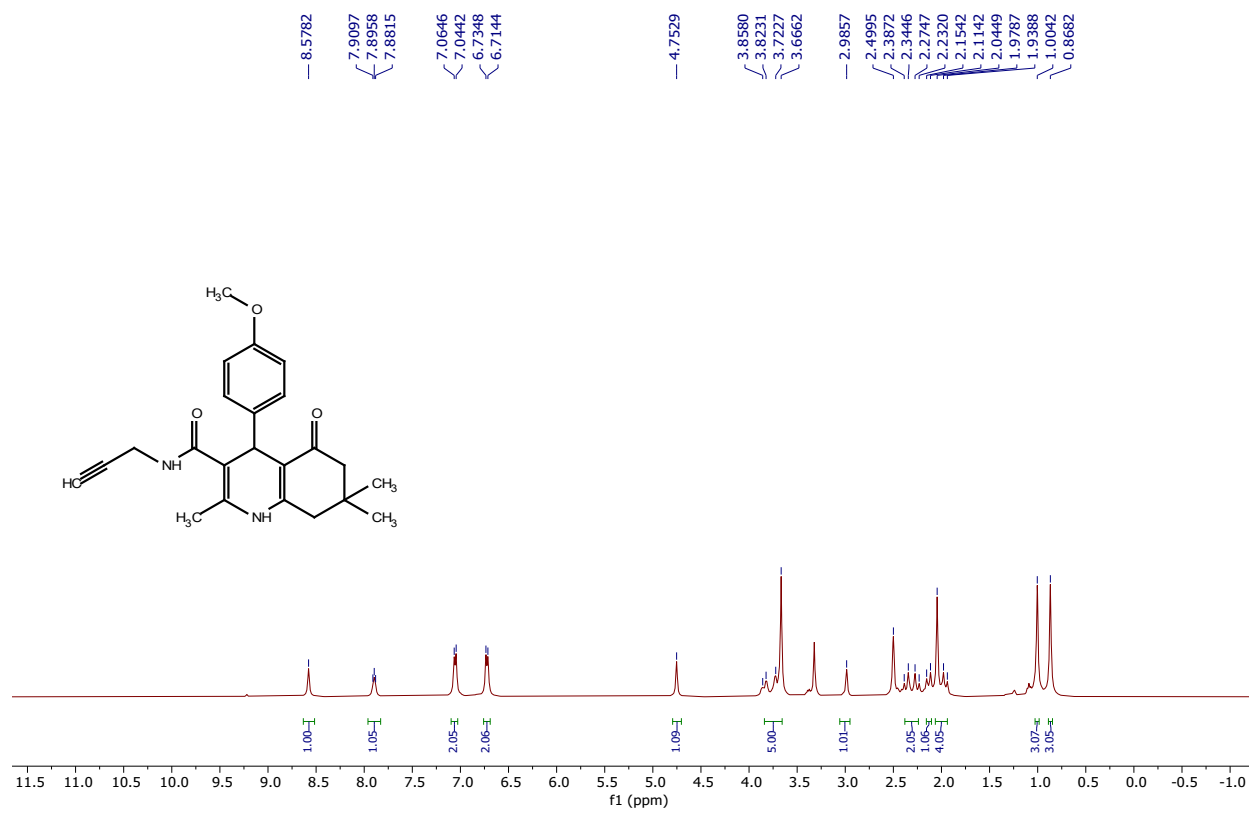

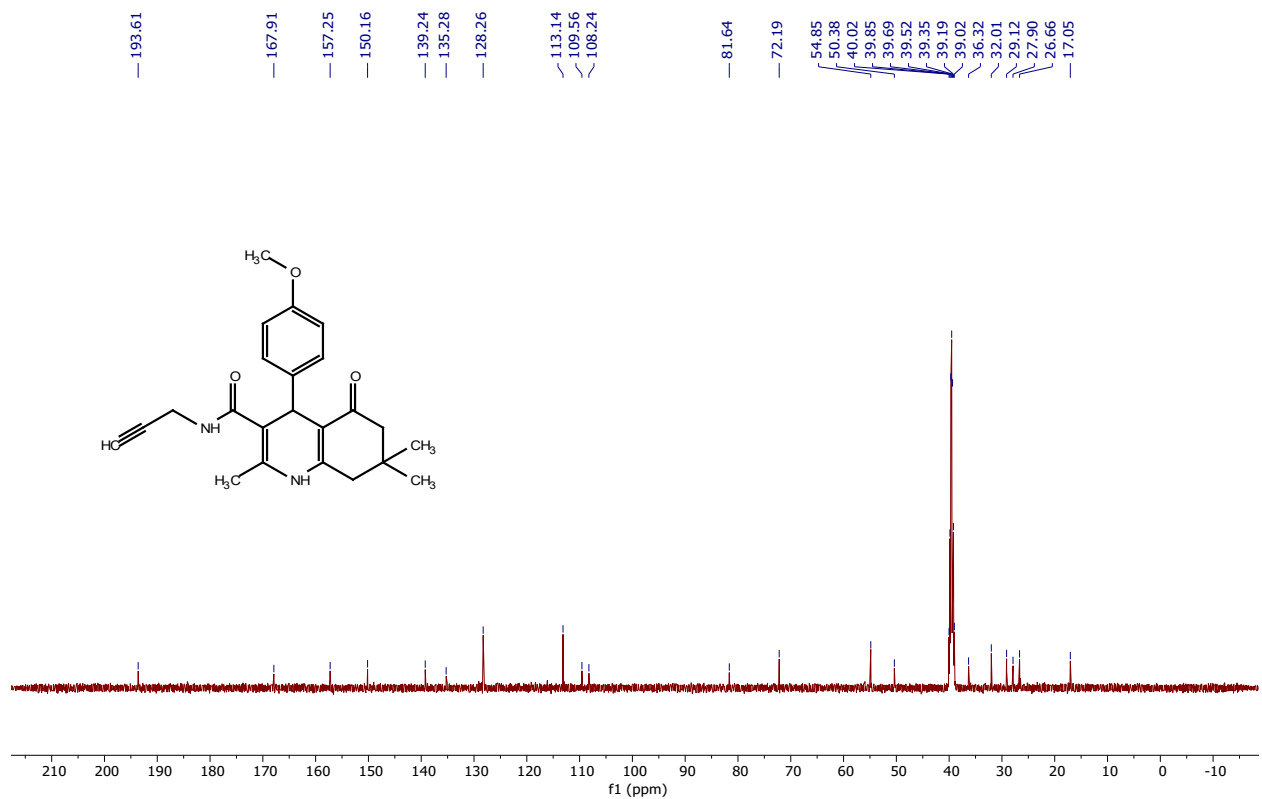

NMR spectrum of compound I3

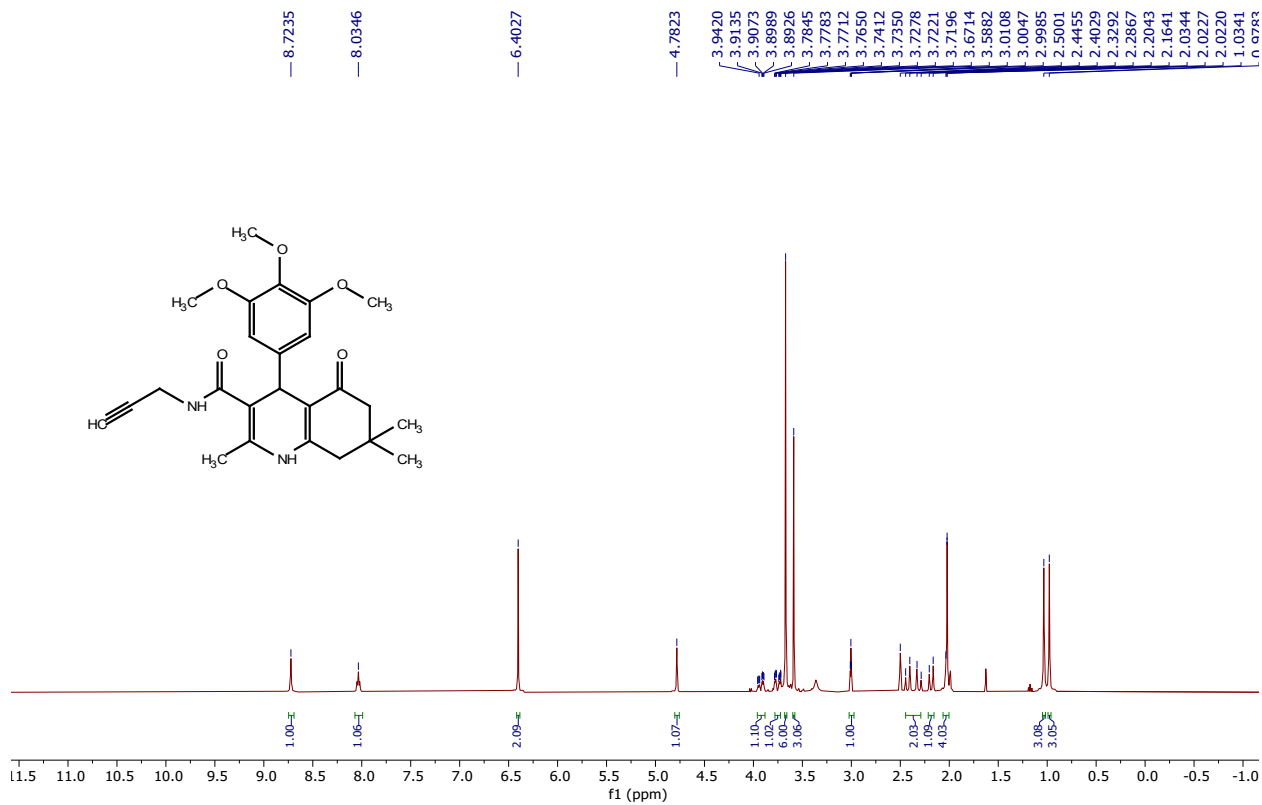

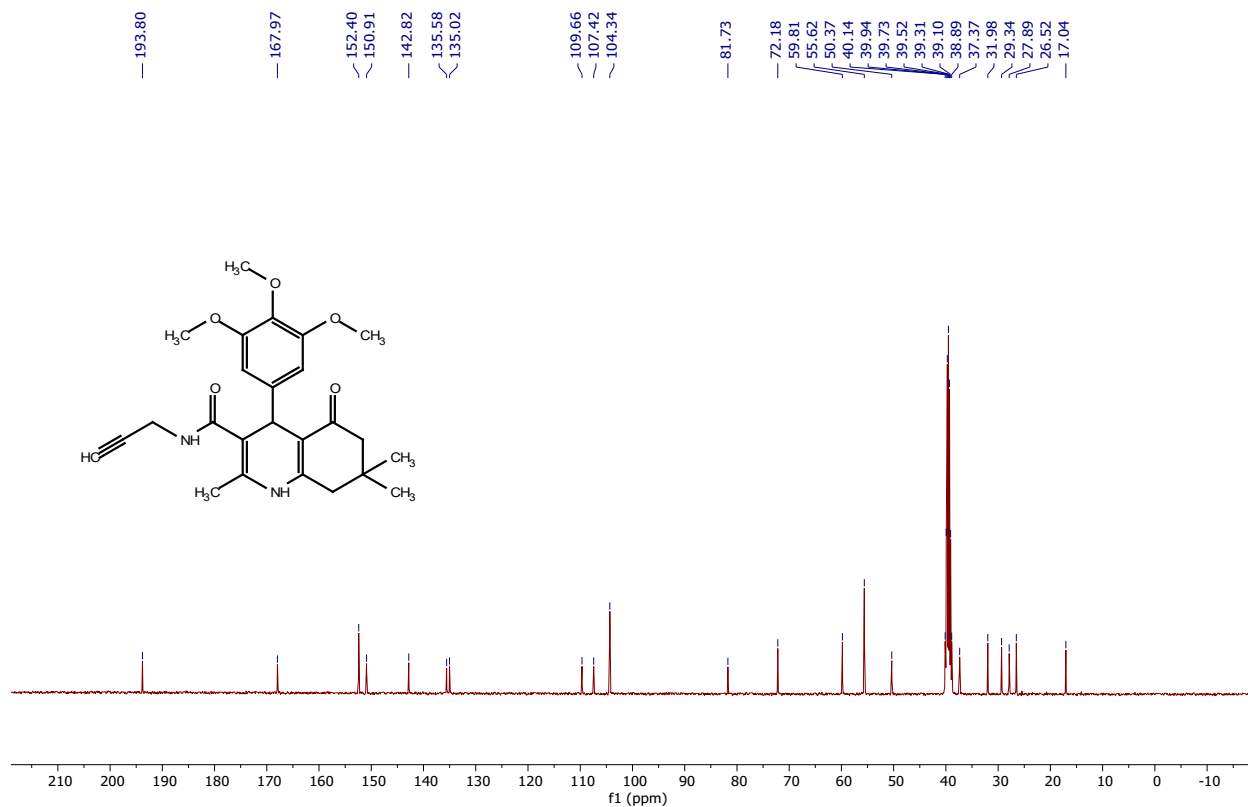

NMR spectrum of compound I4

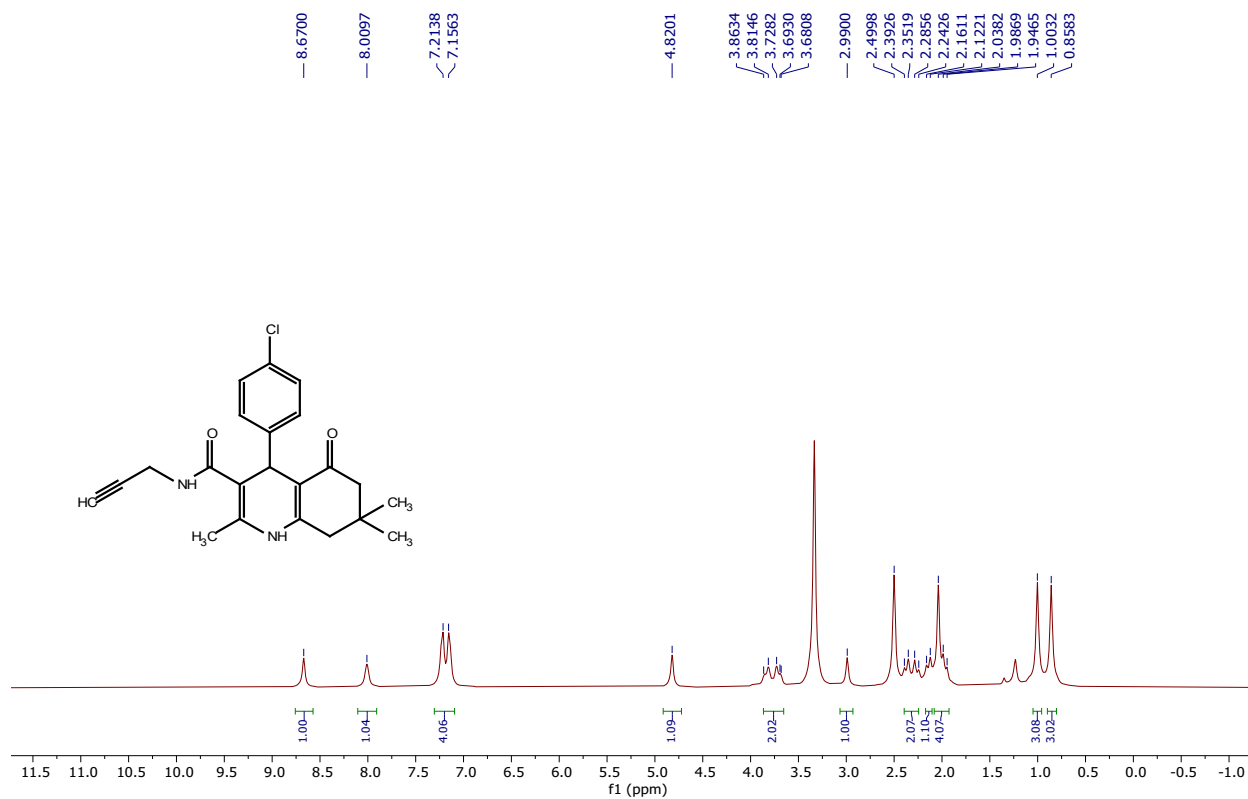



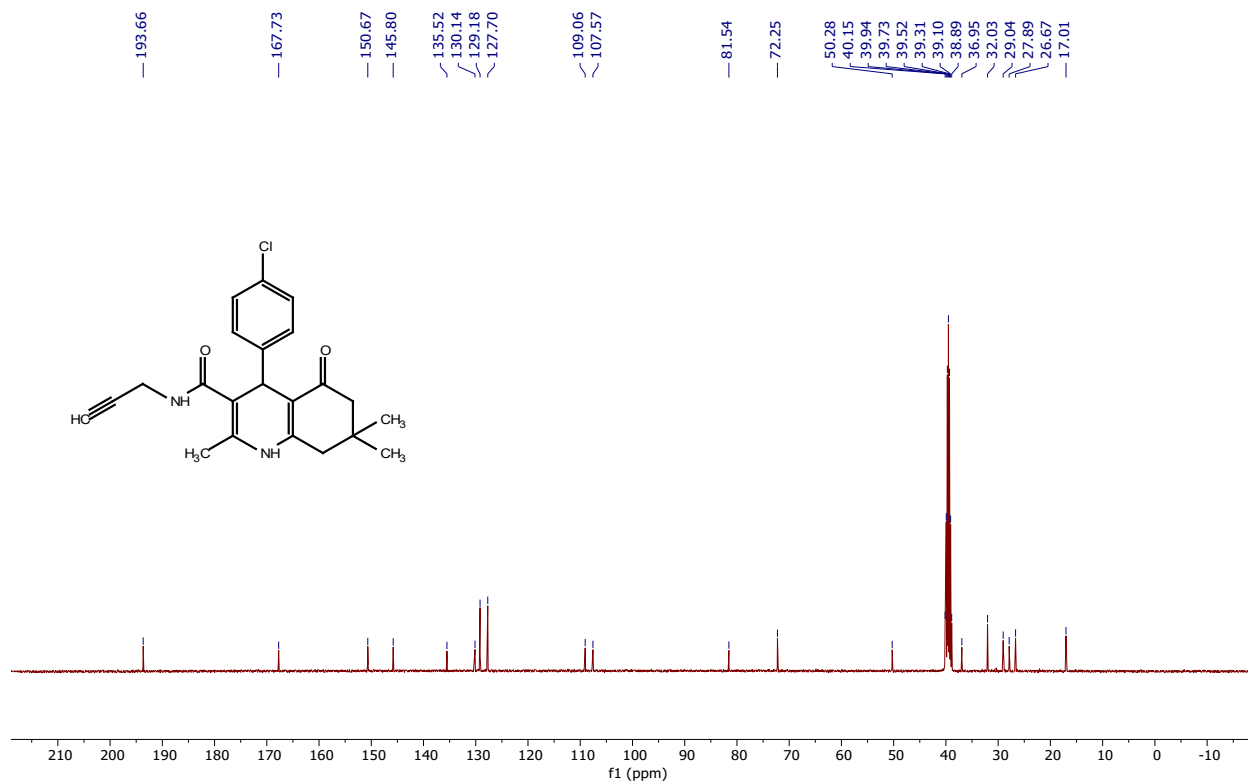

### NMR spectrum of compound I5

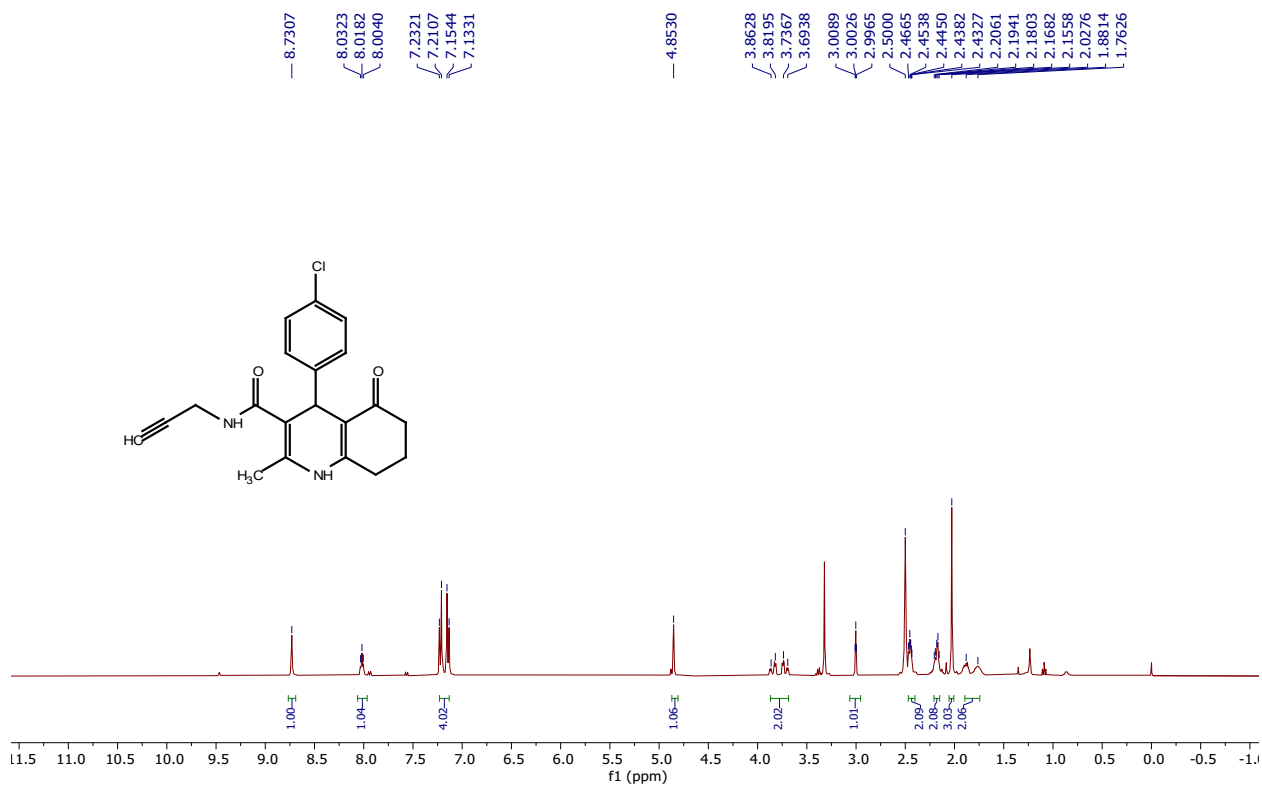

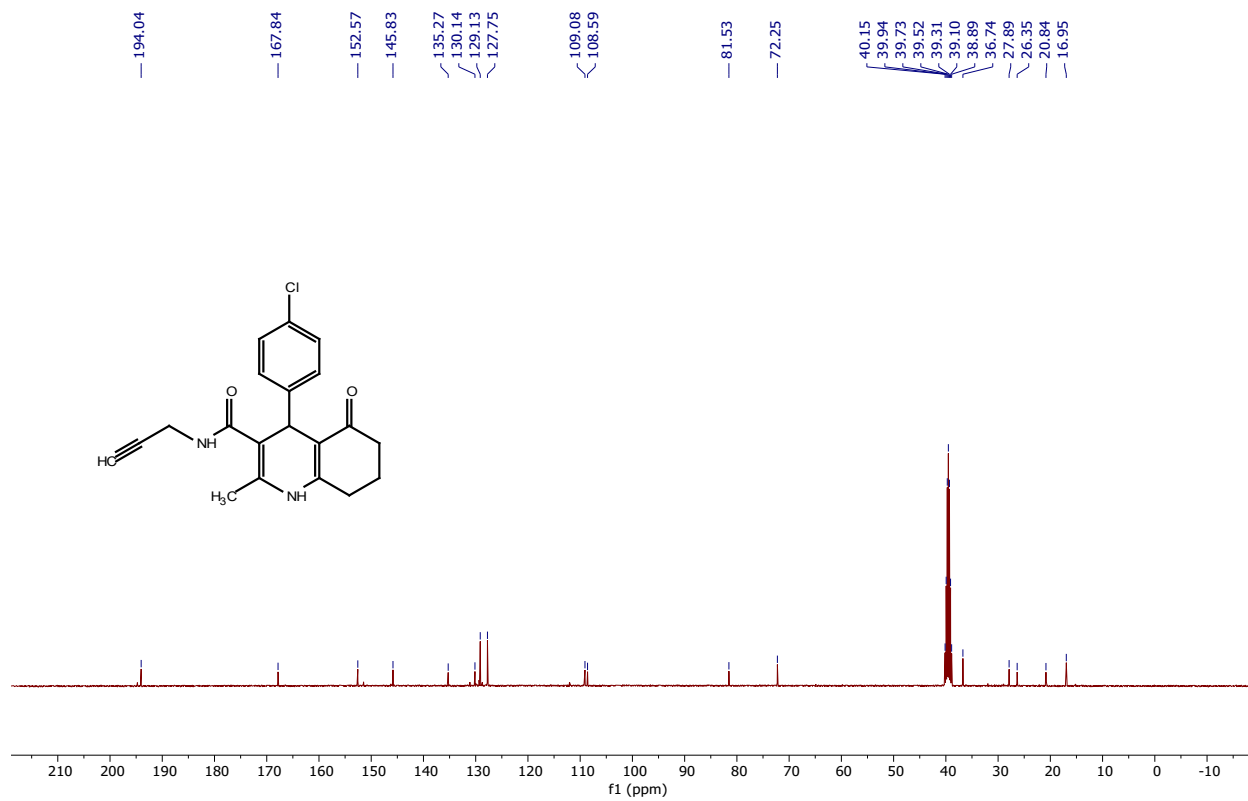

NMR spectrum of compound I6

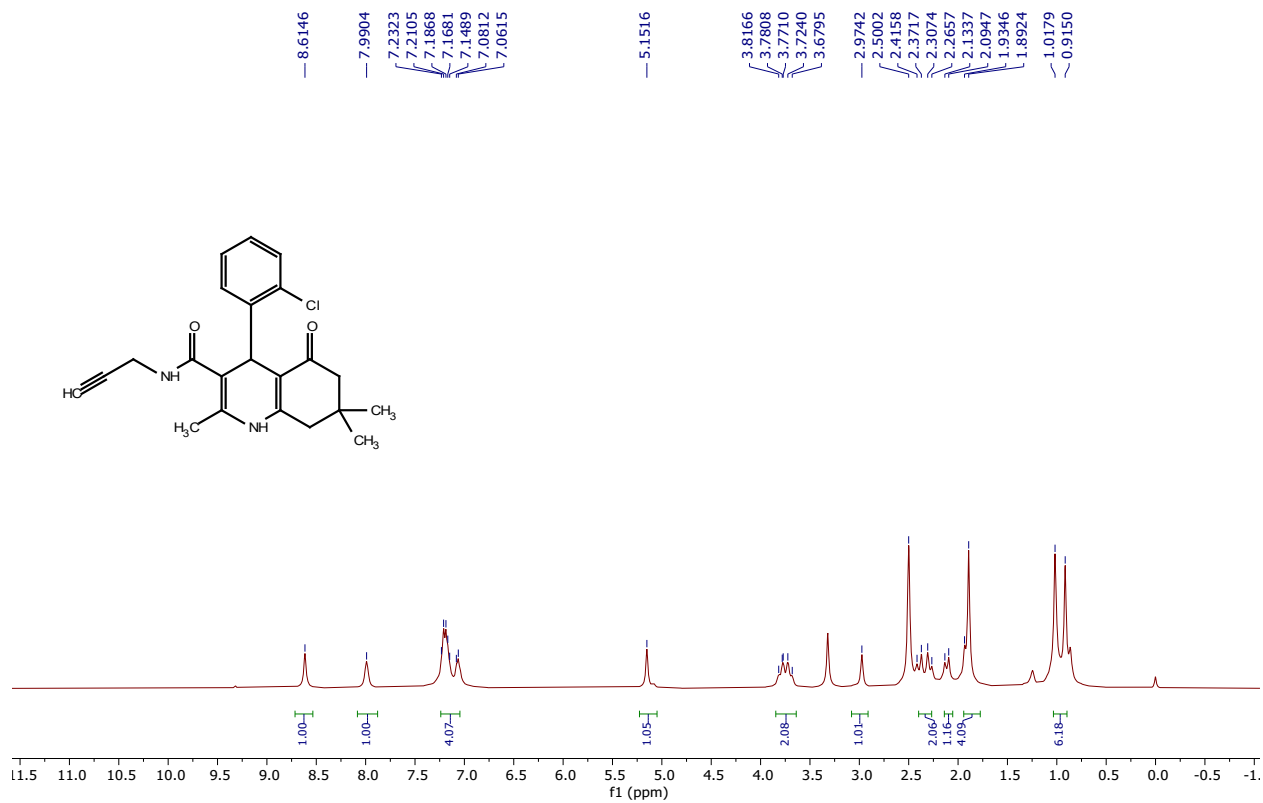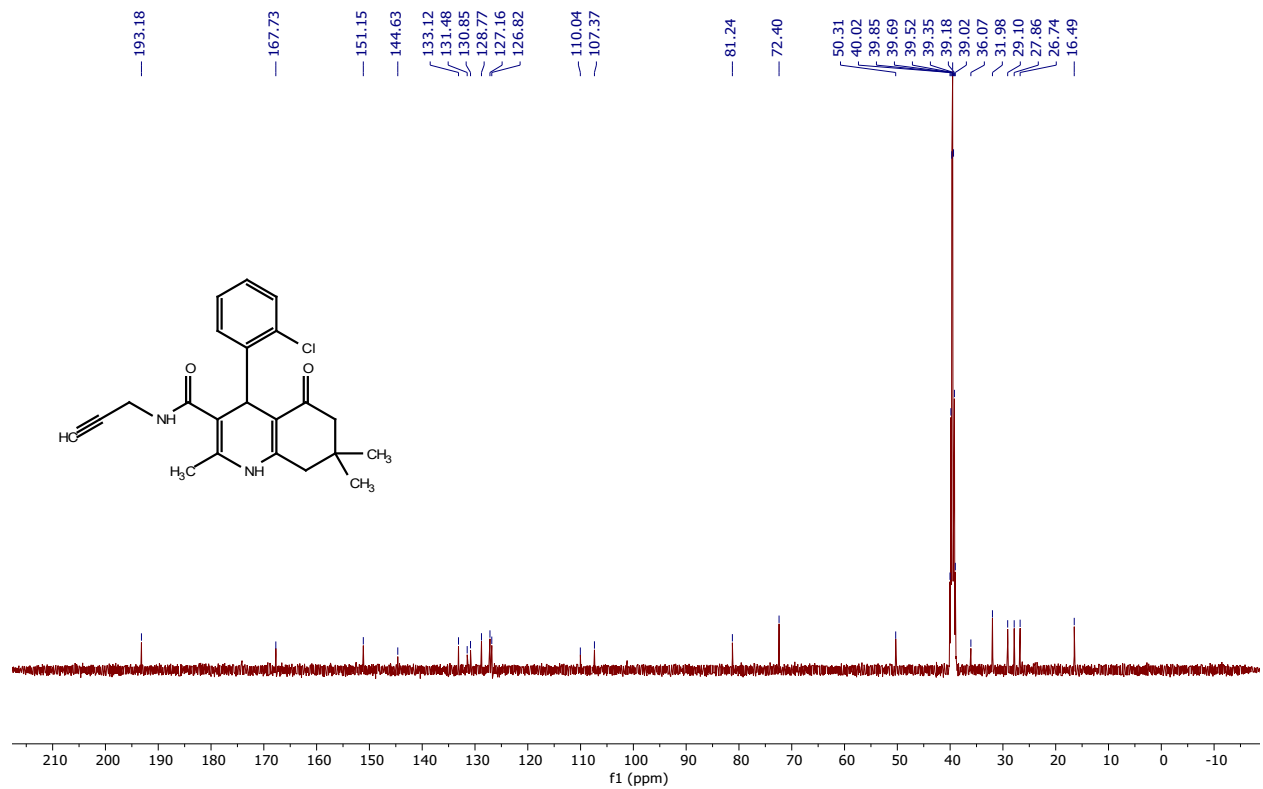

NMR spectrum of compound I7

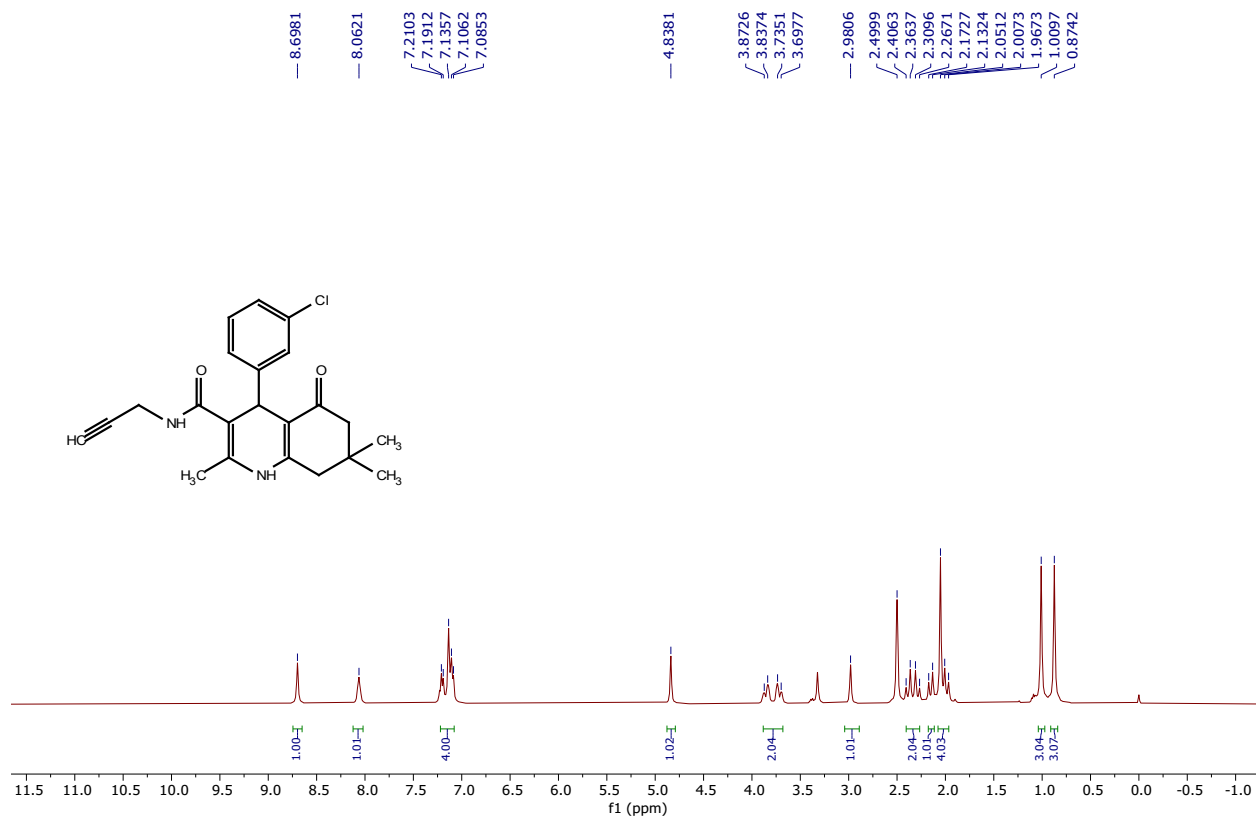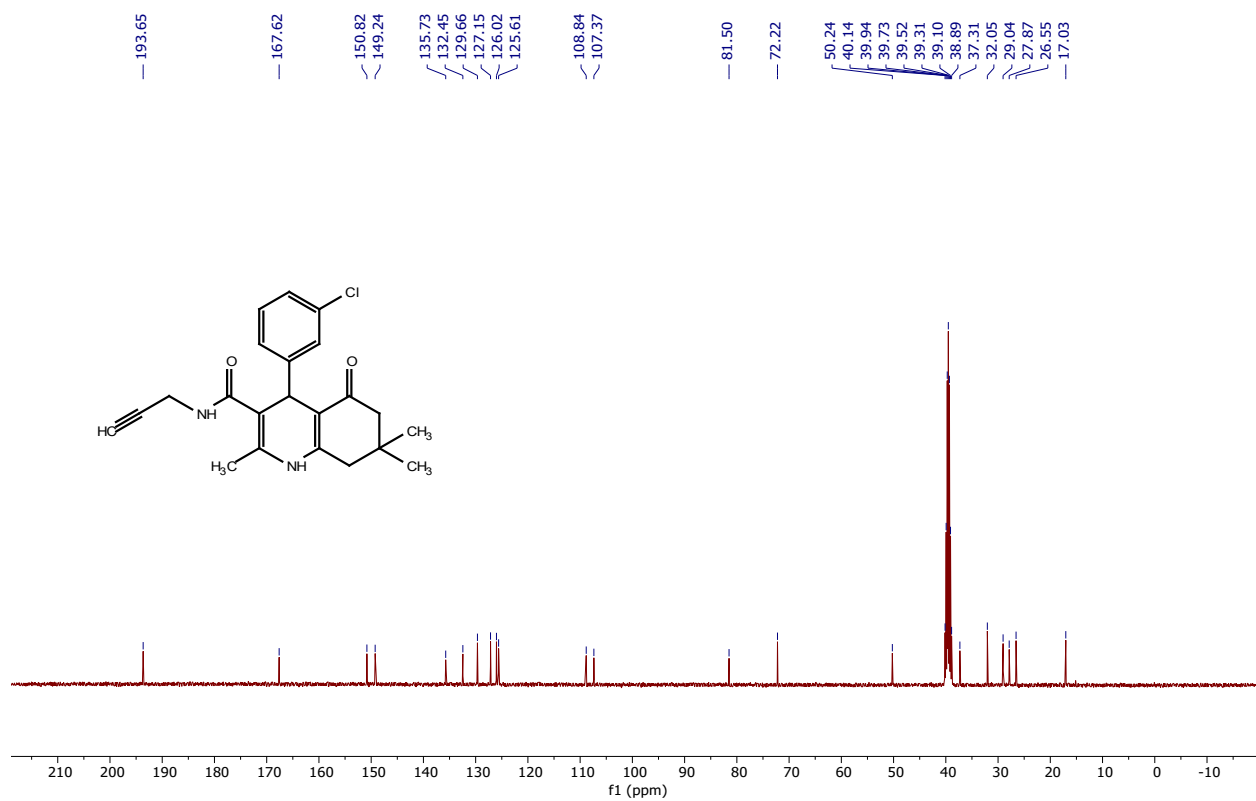

NMR spectrum of compound I8

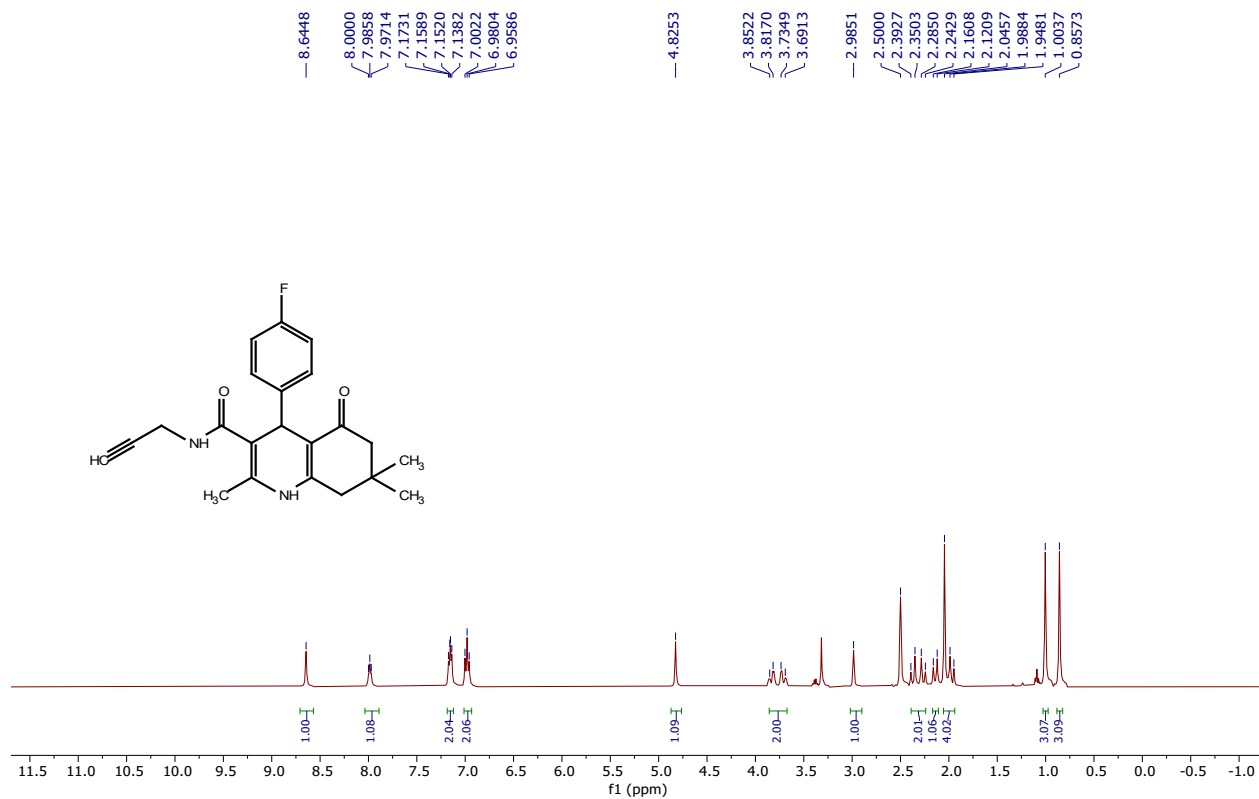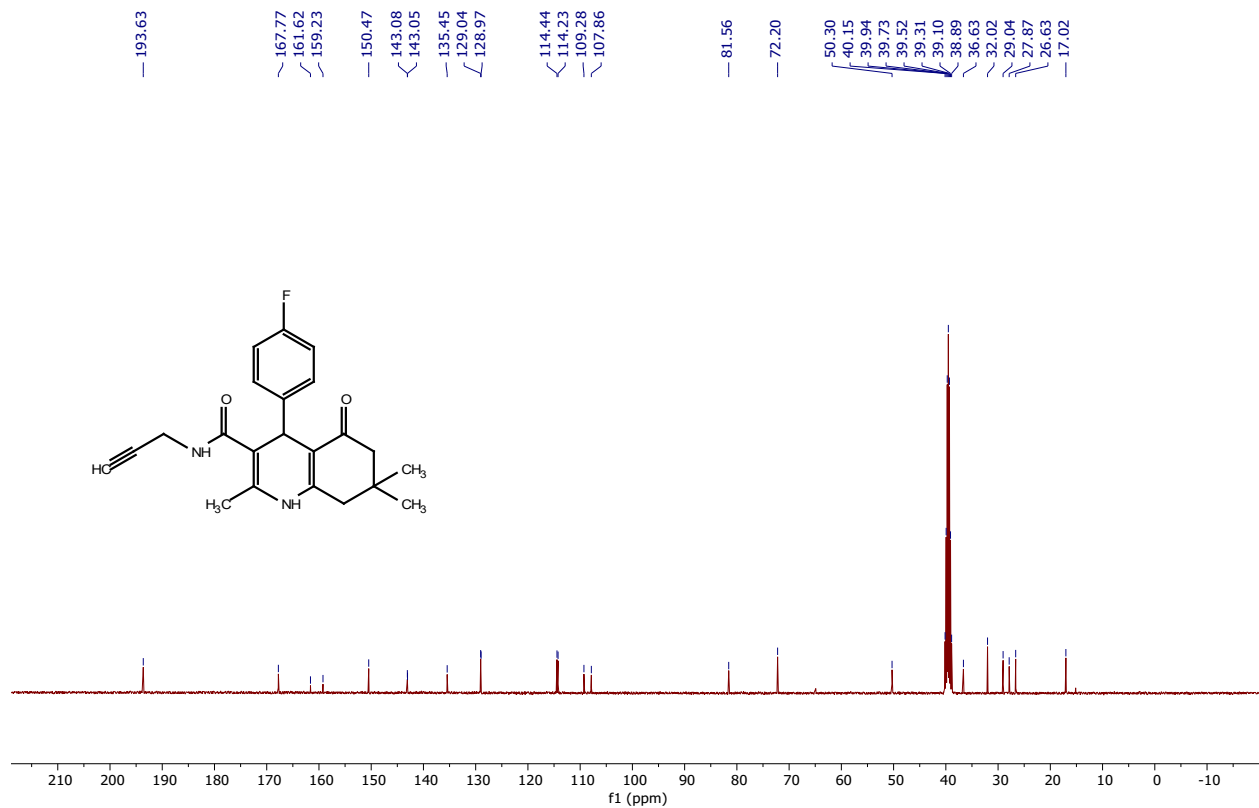

NMR spectrum of compound I9

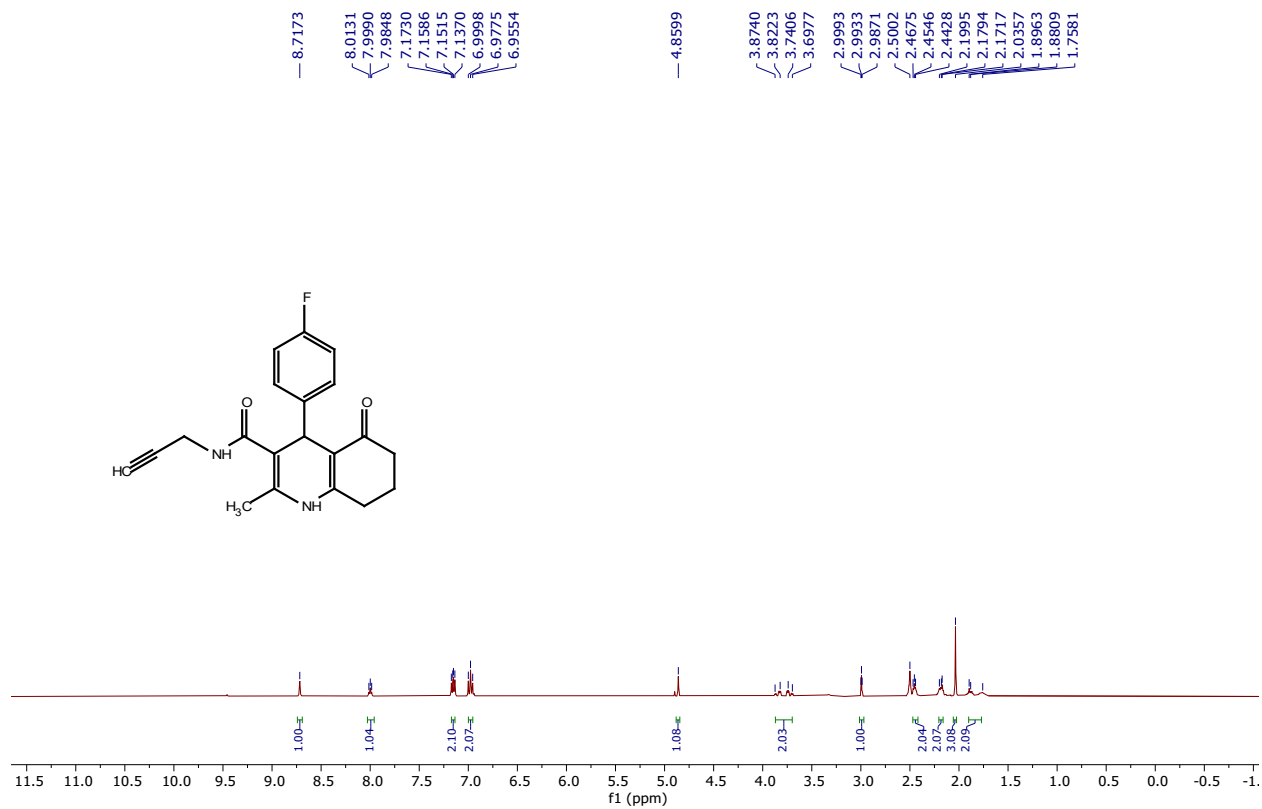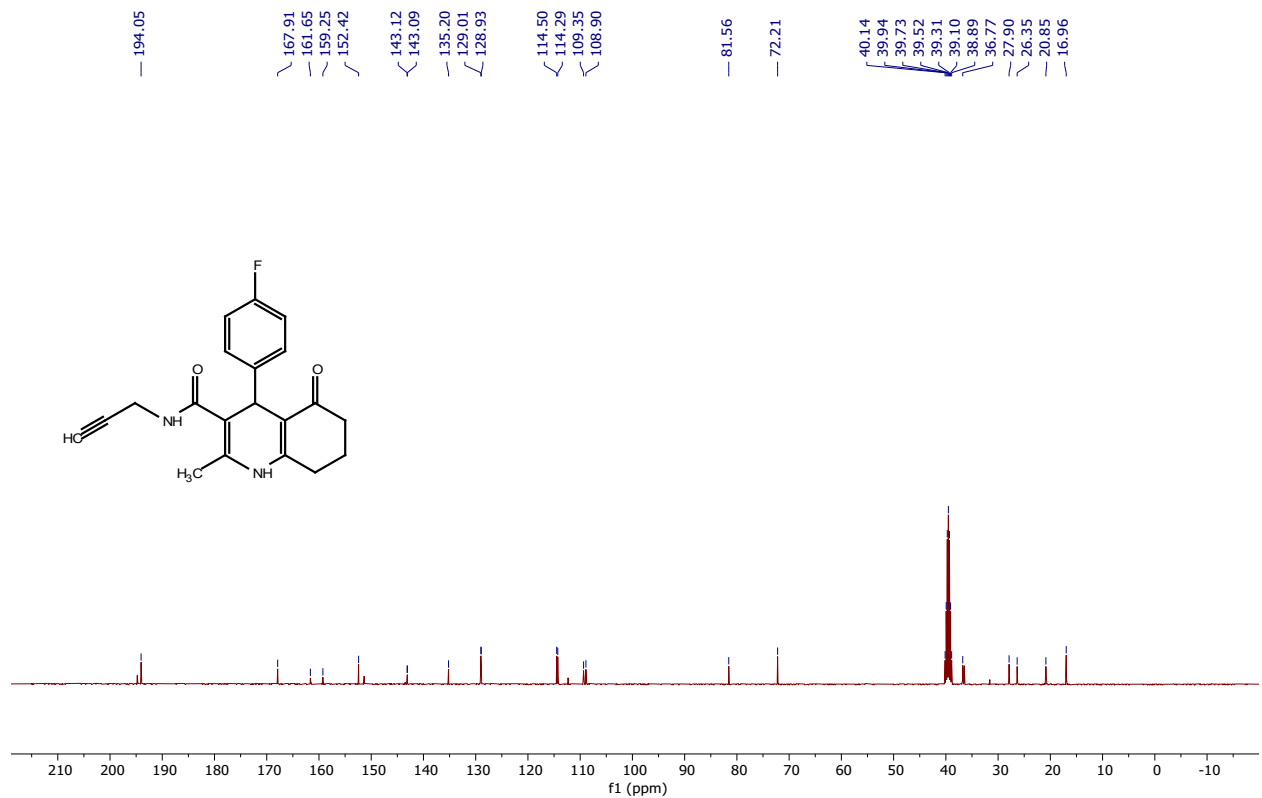

NMR spectrum of compound I10



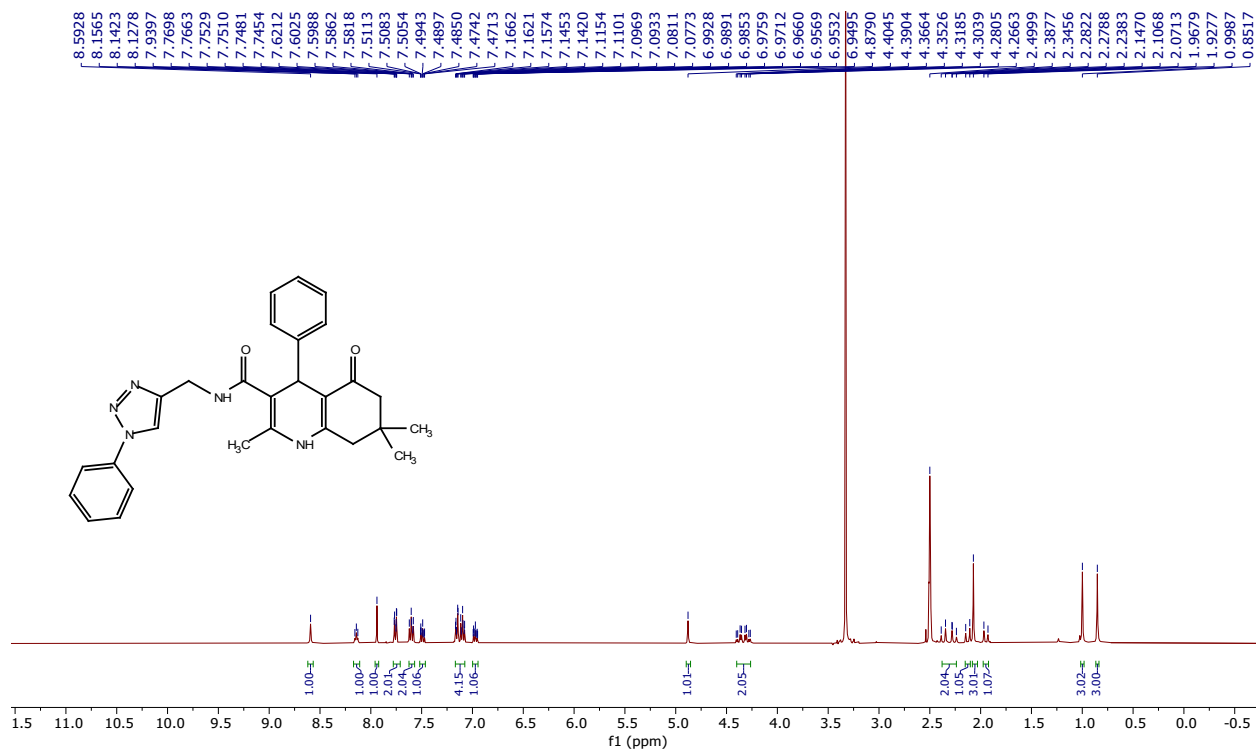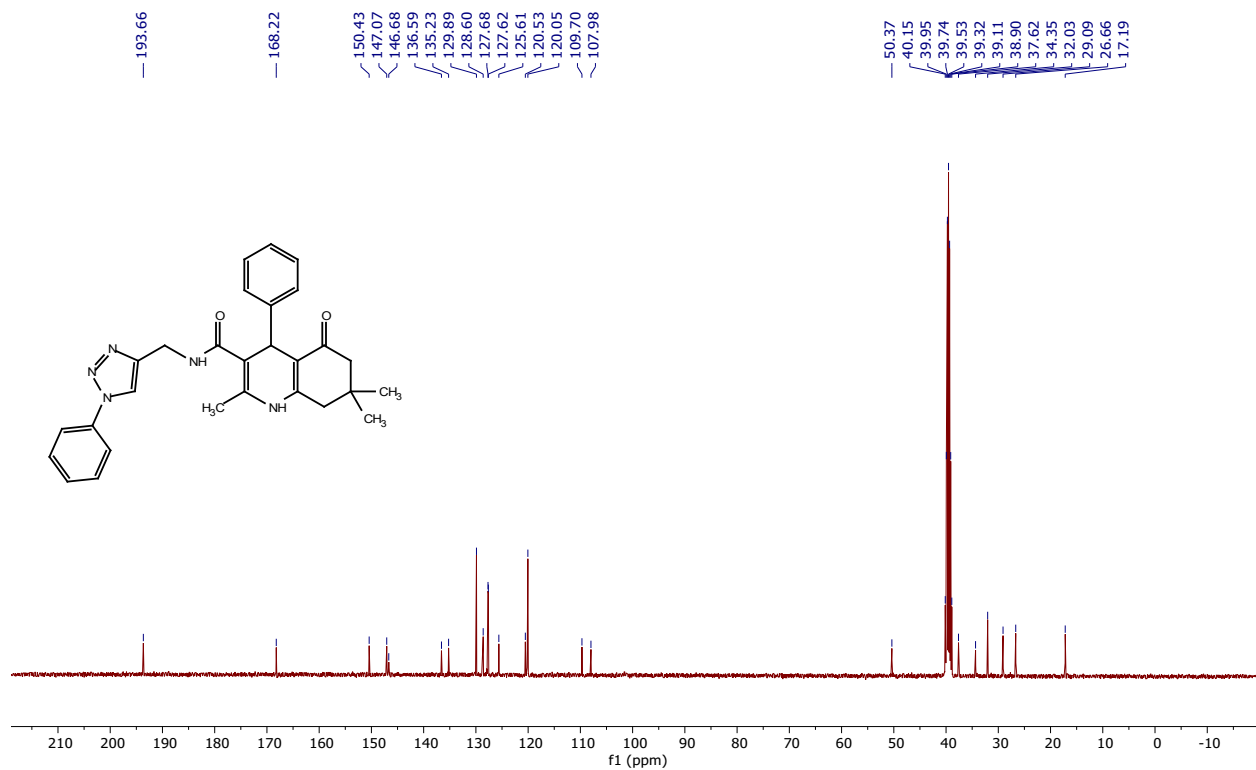

NMR spectrum of compound J2



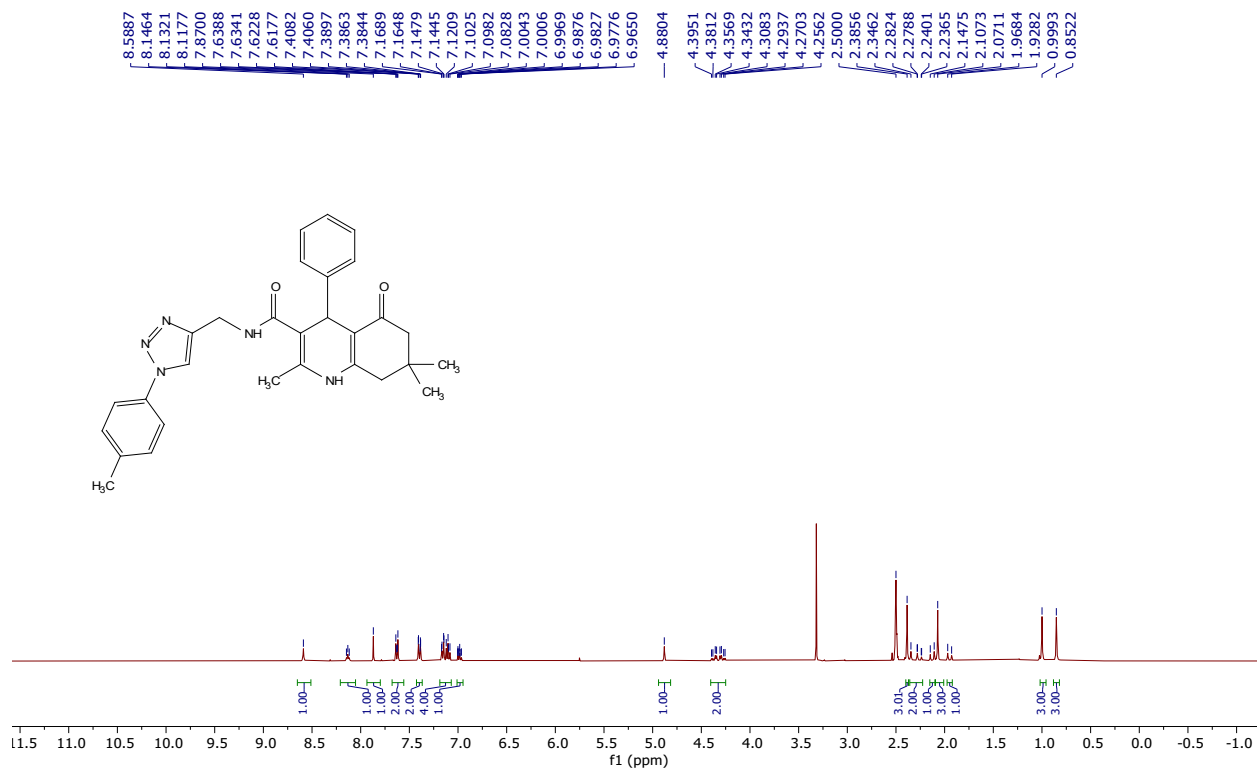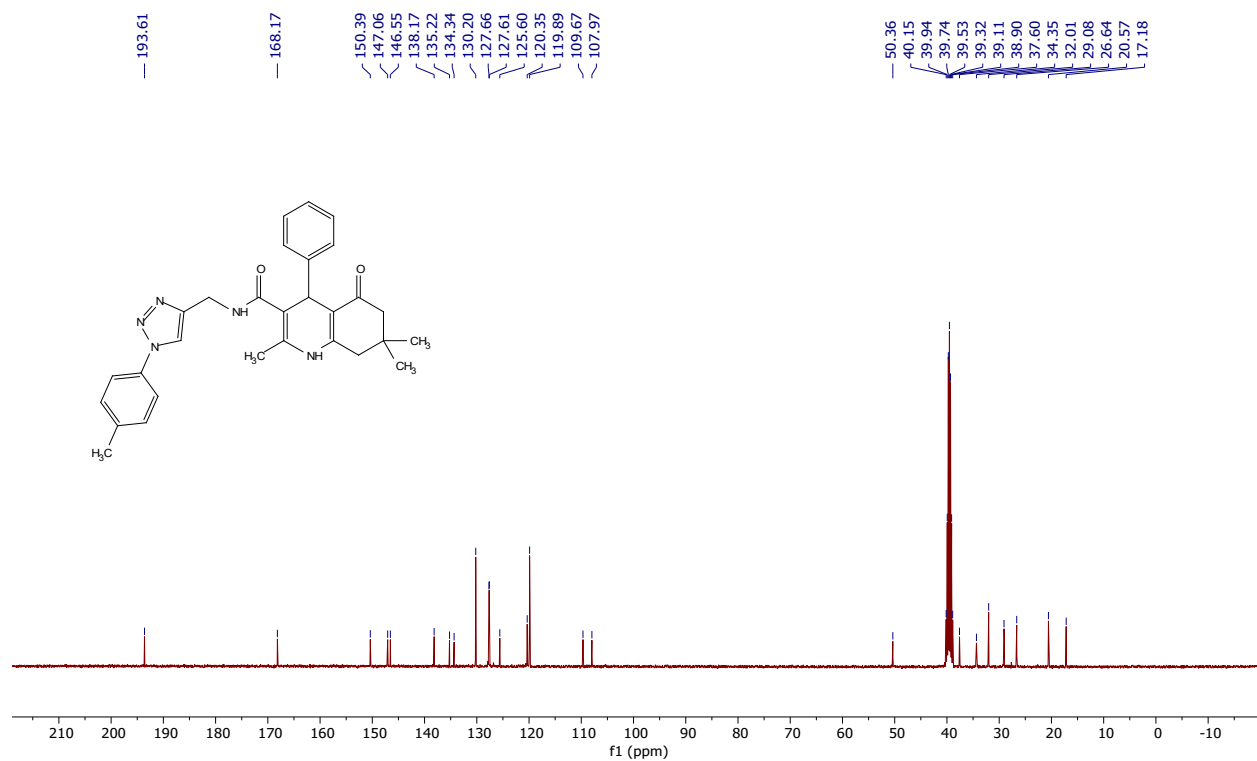

NMR spectrum of compound J3

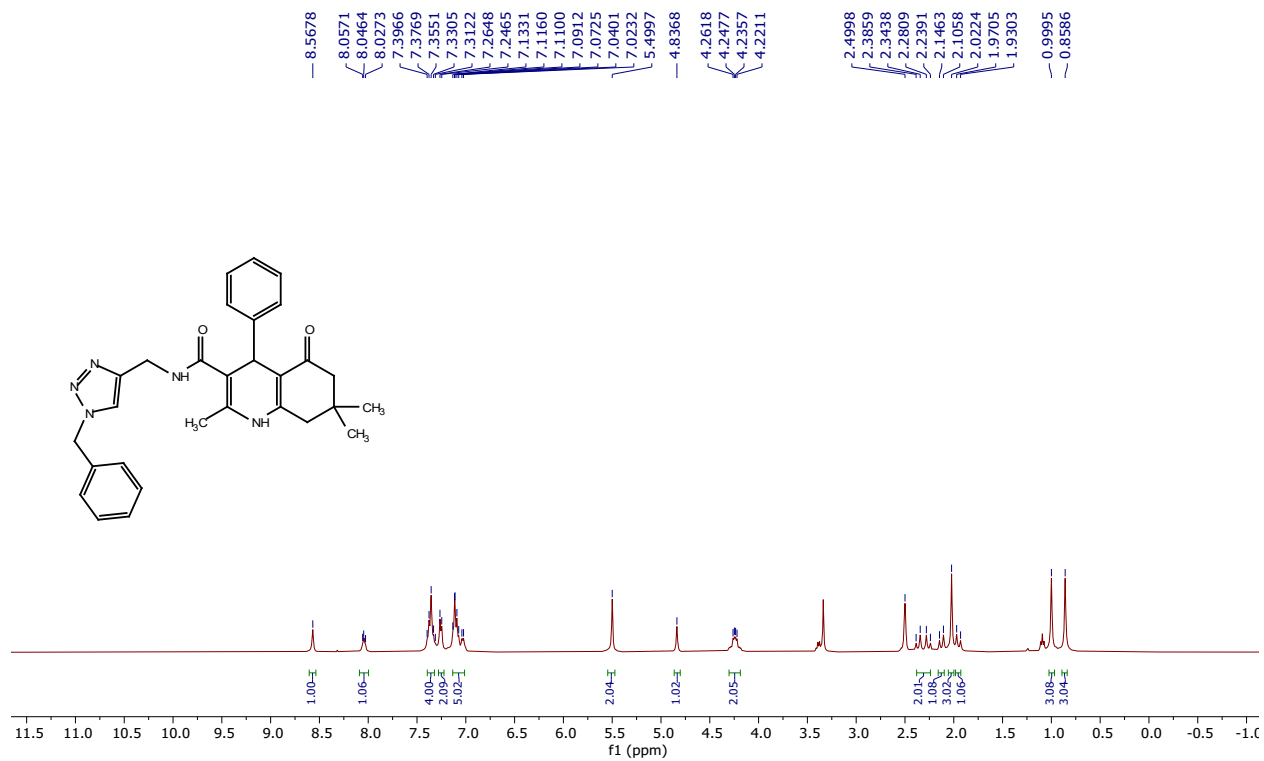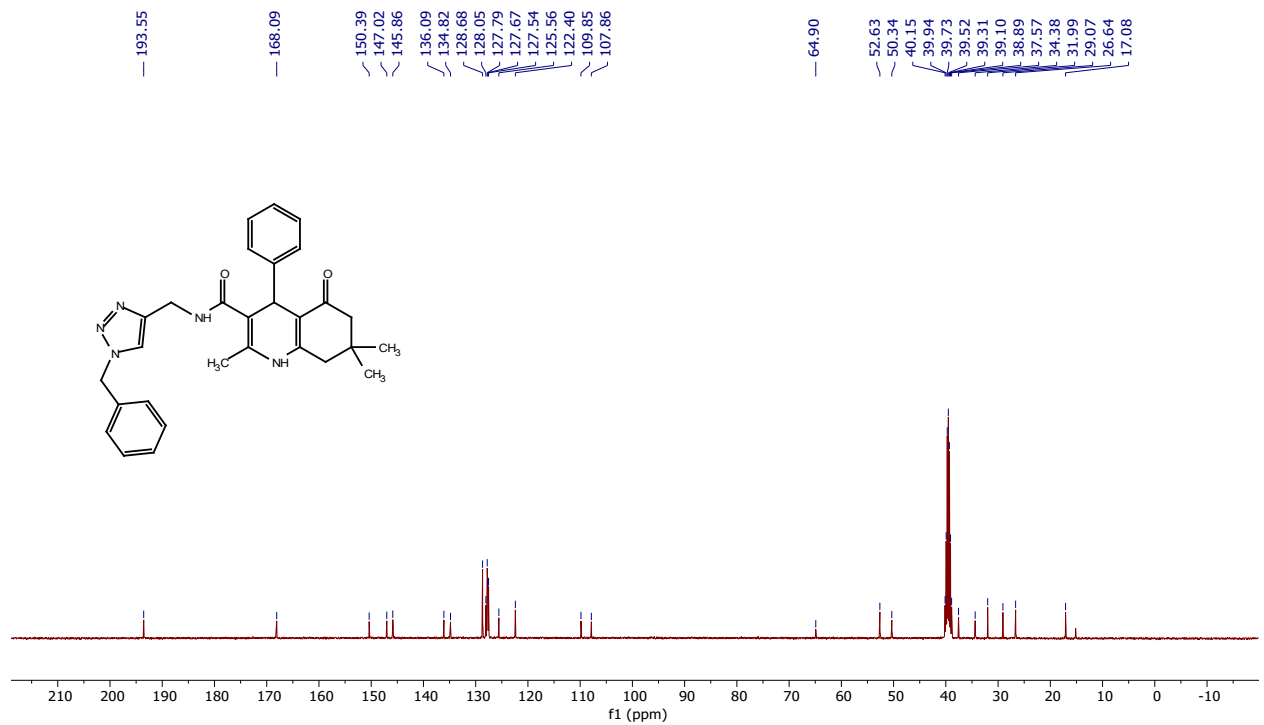

# NMR spectrum of compound J4

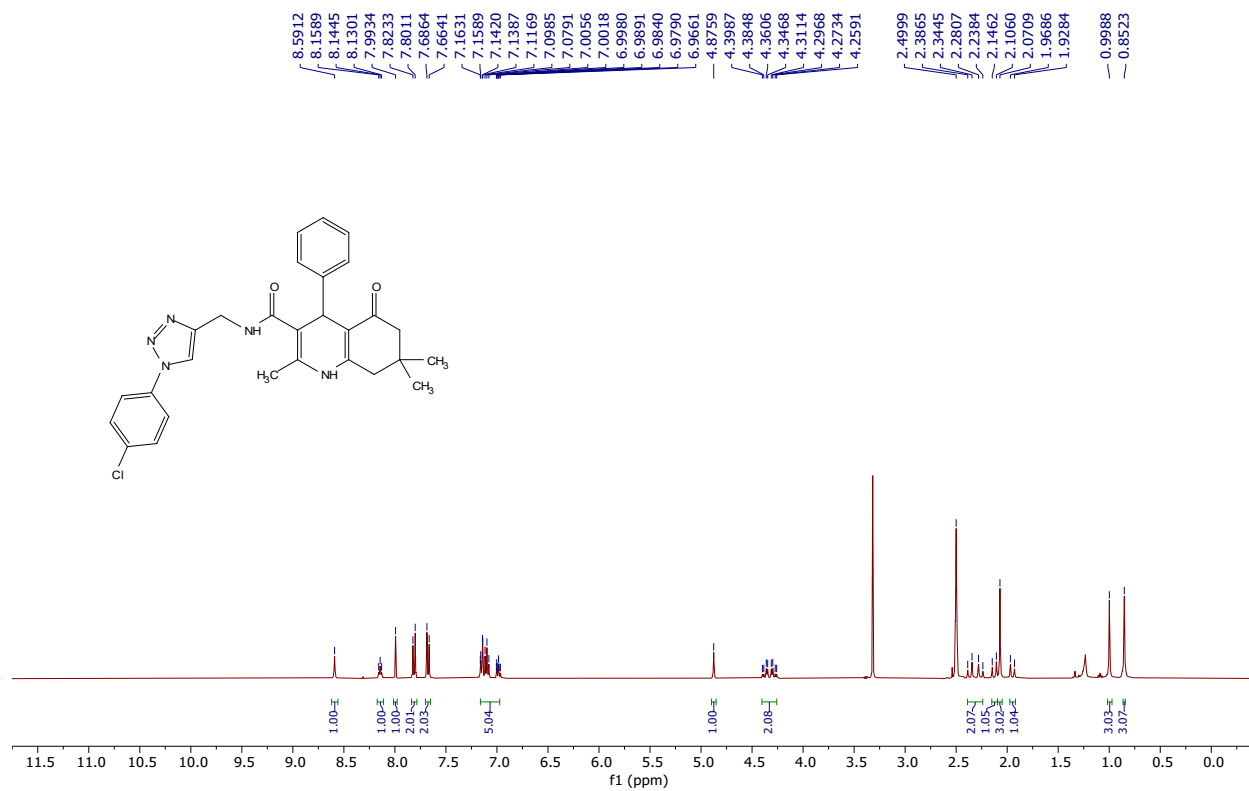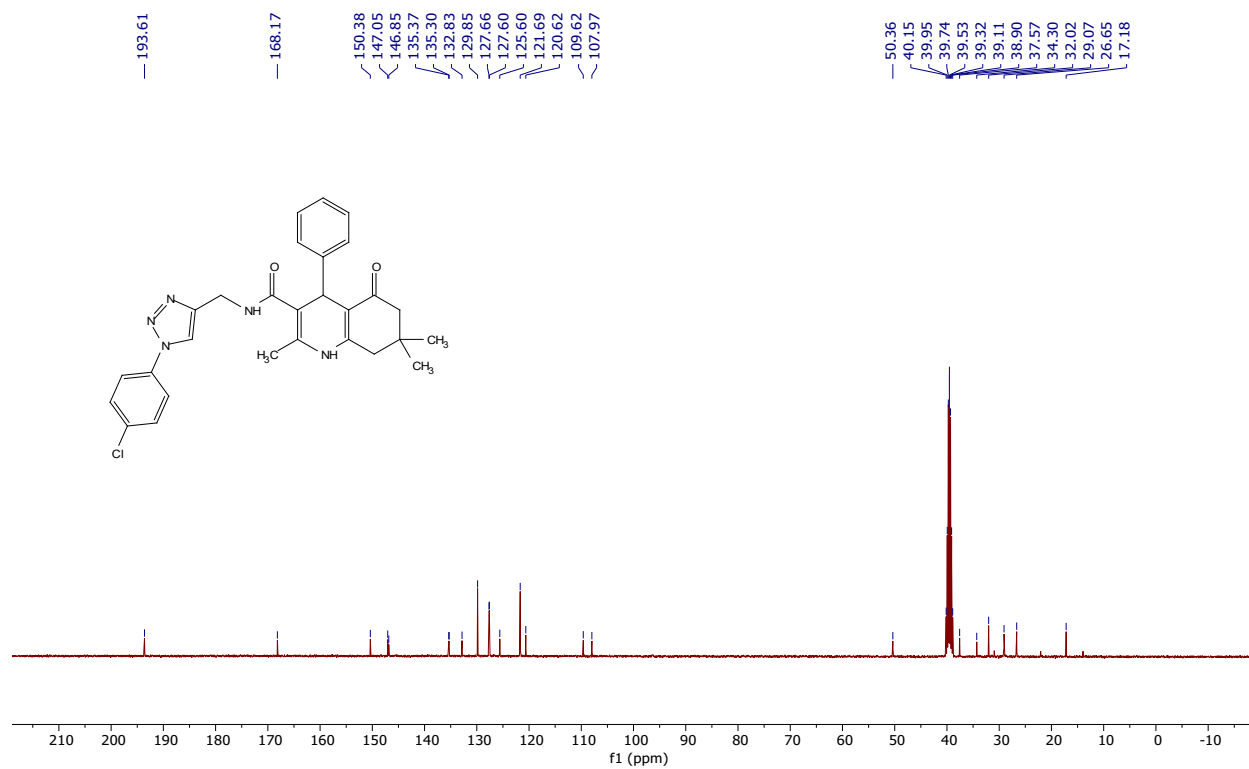

# NMR spectrum of compound J5

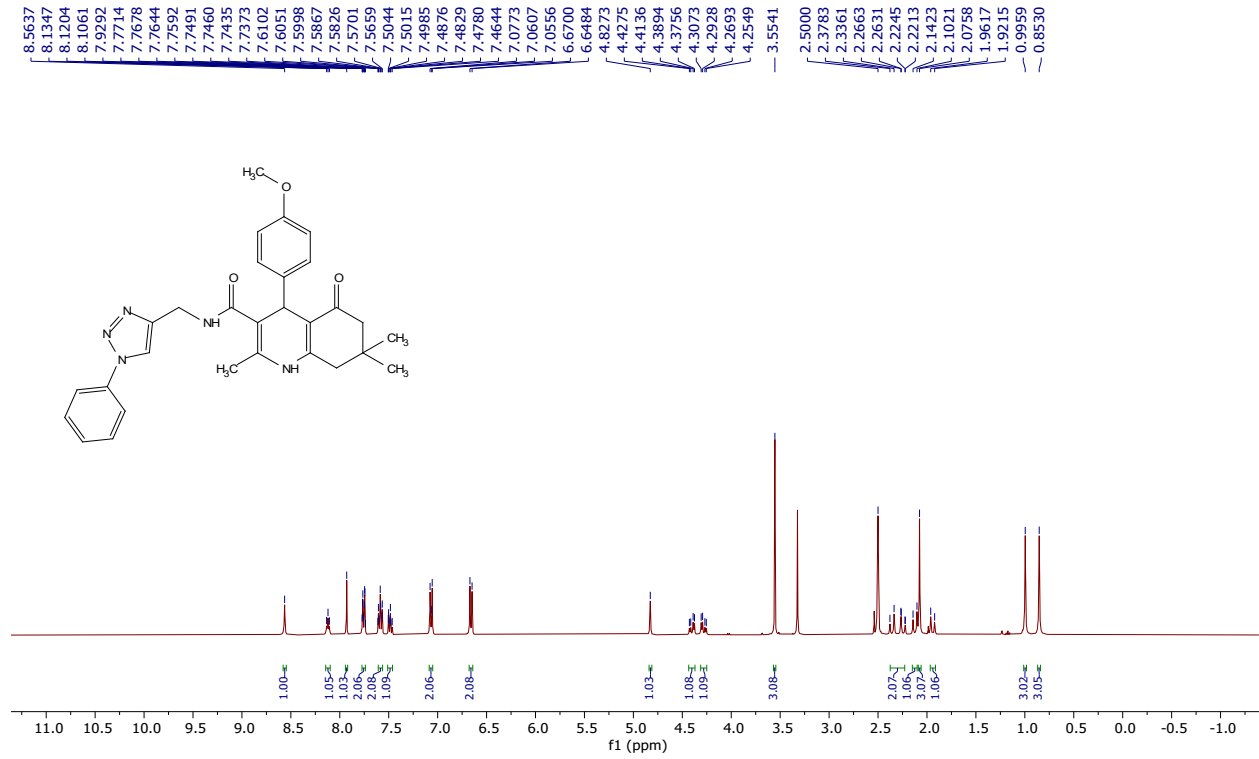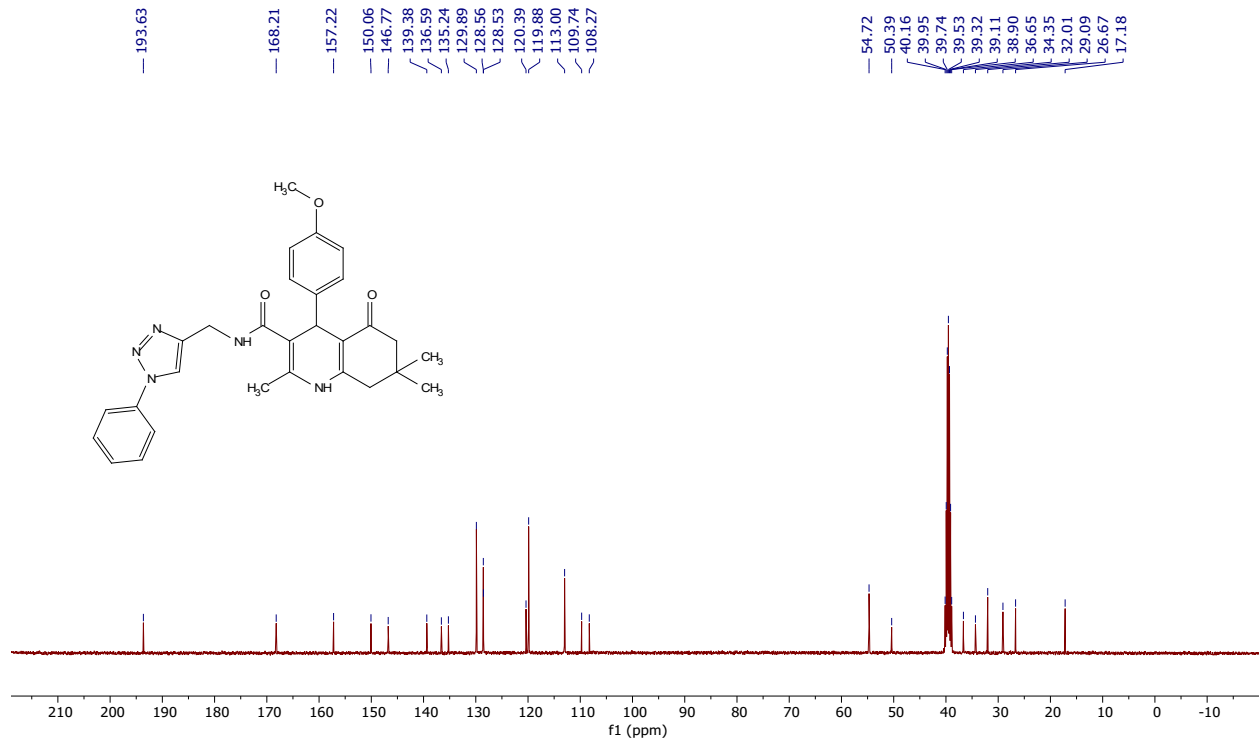

# NMR spectrum of compound J6

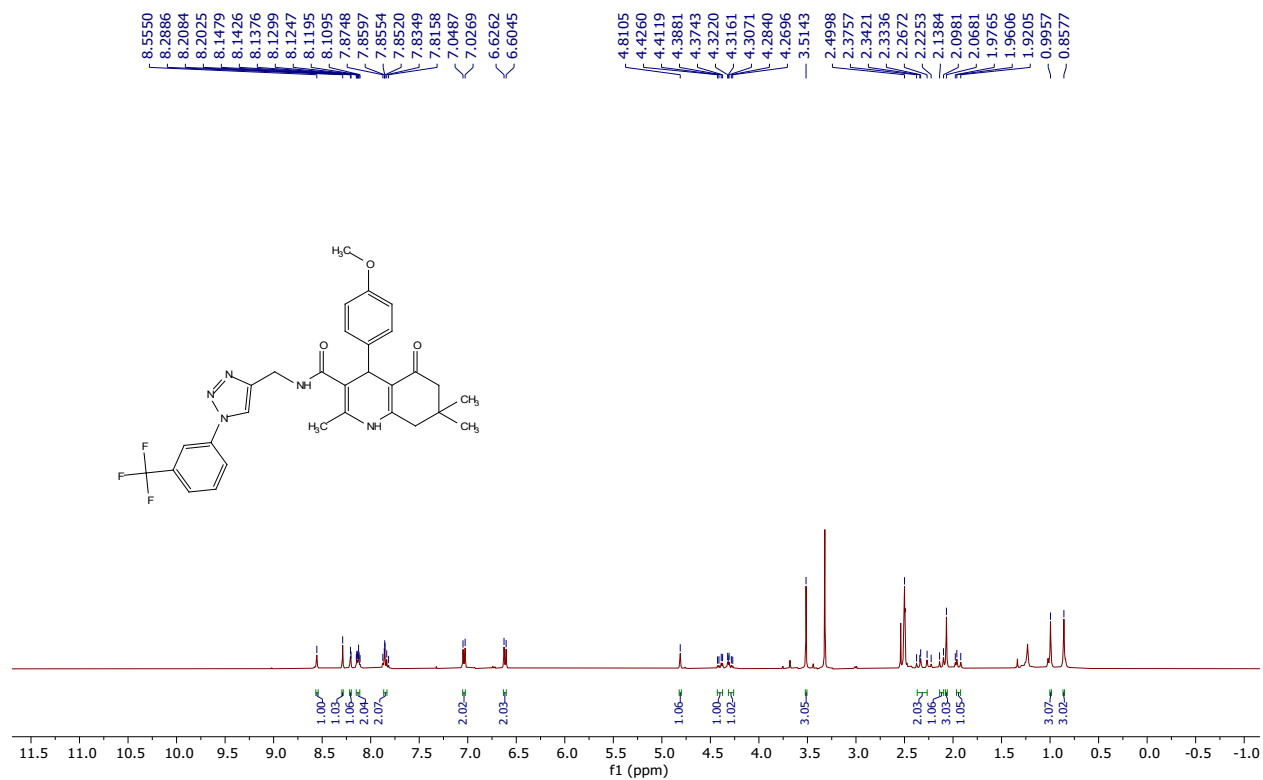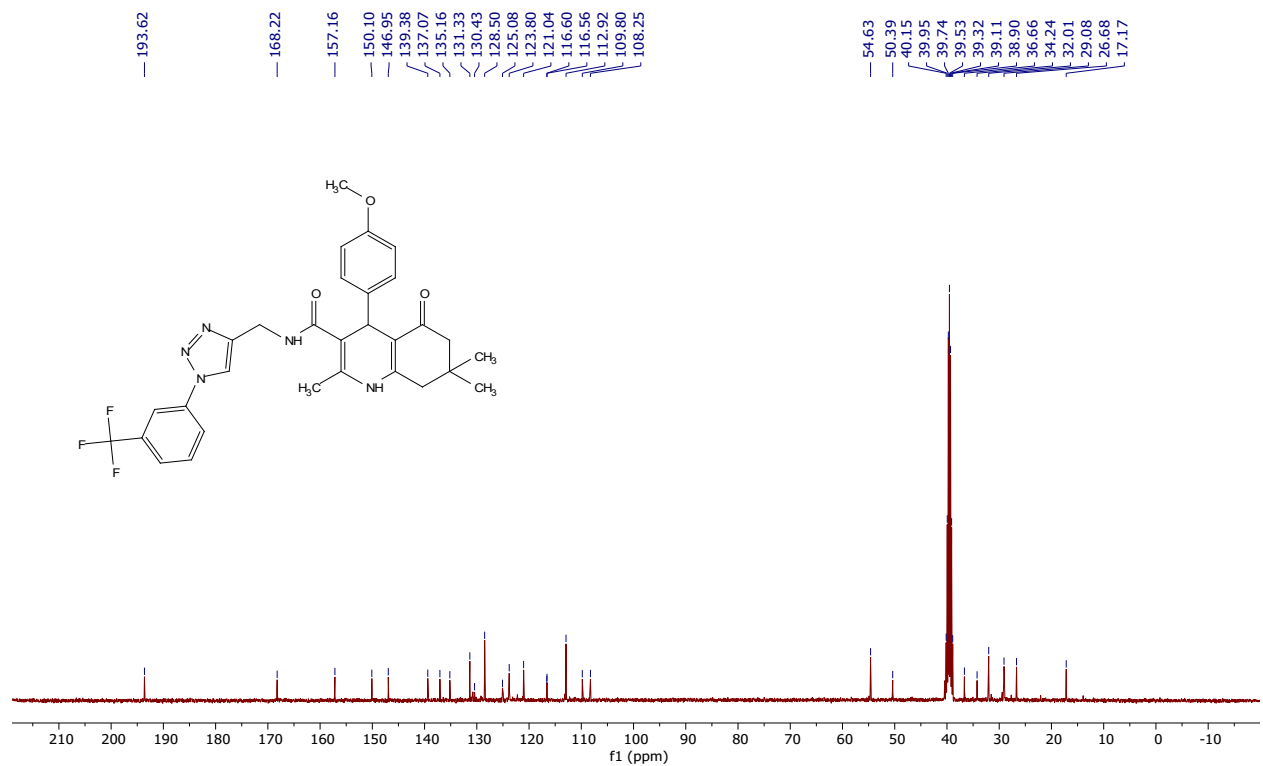

# NMR spectrum of compound J7

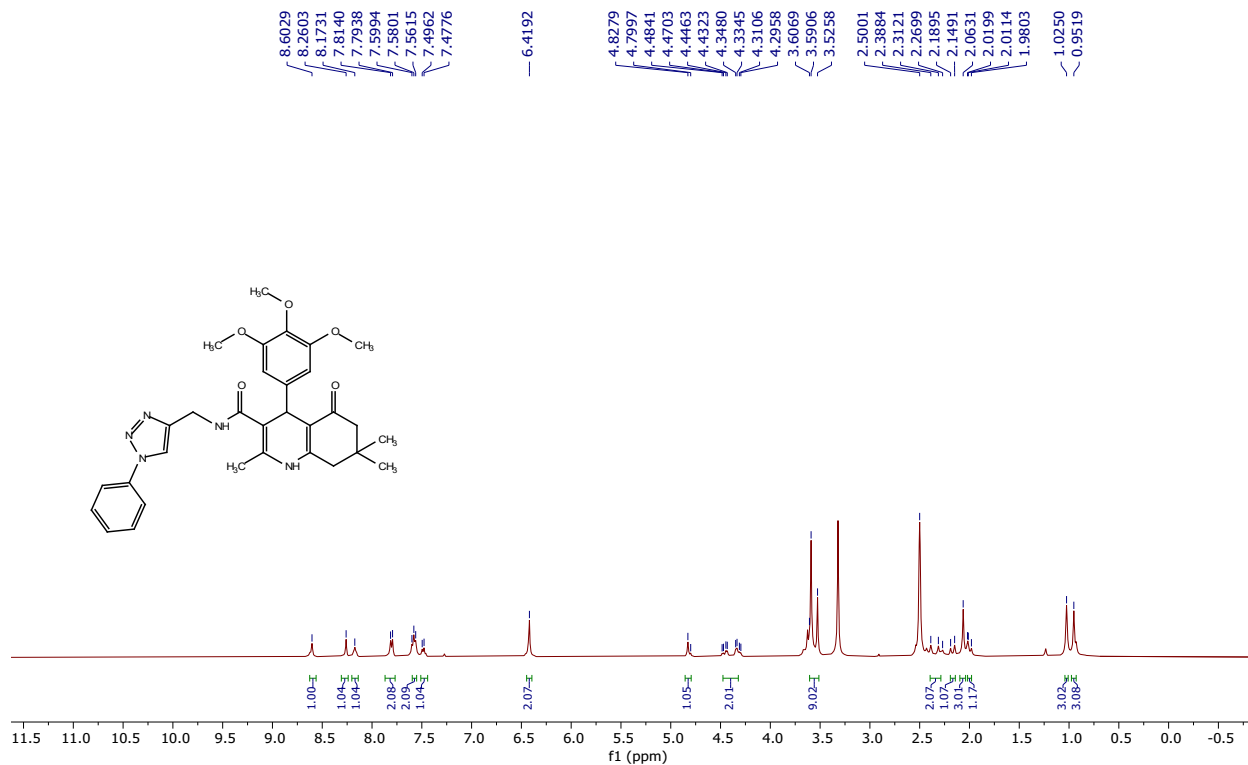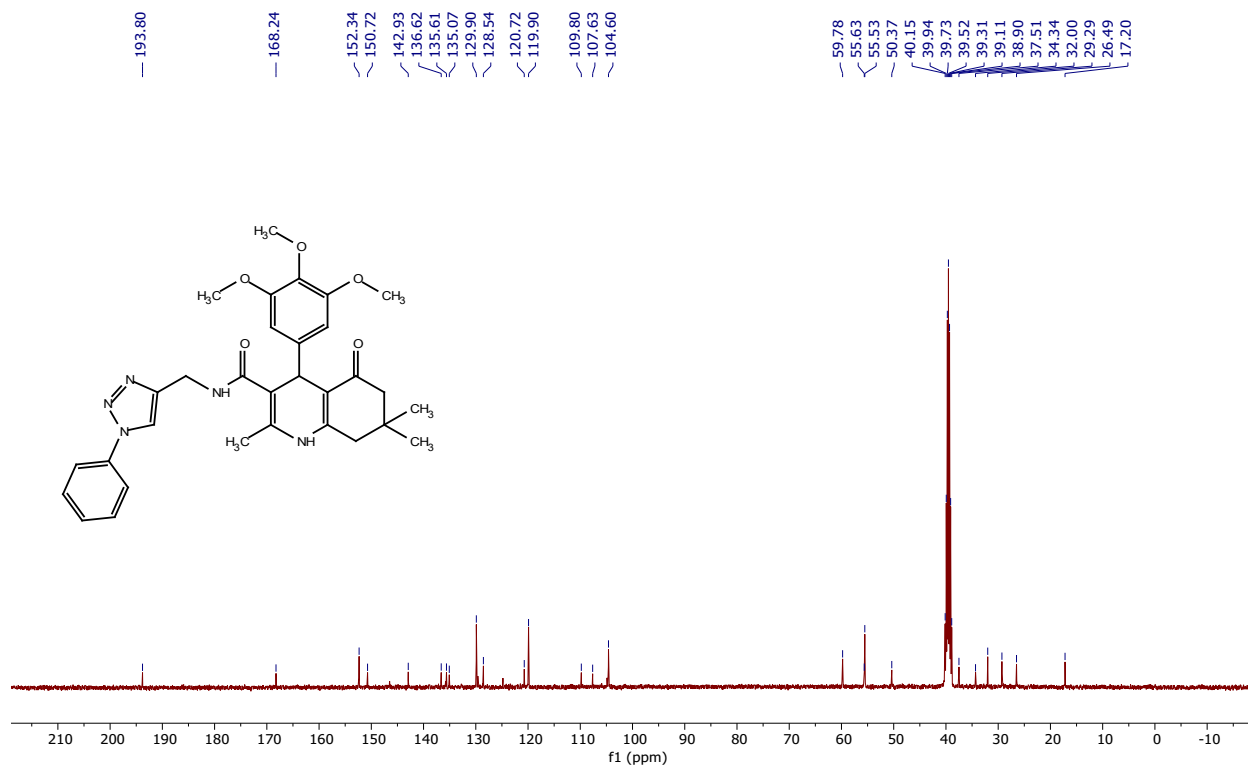

# NMR spectrum of compound J8

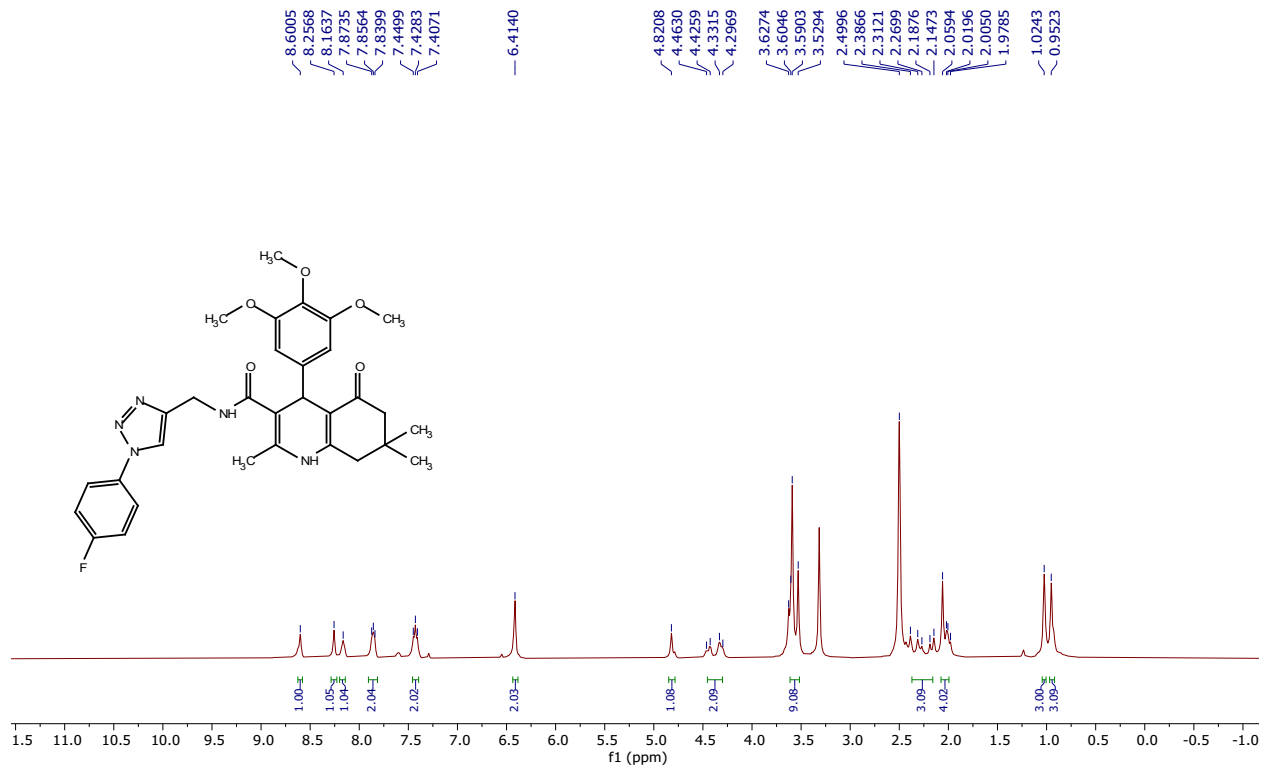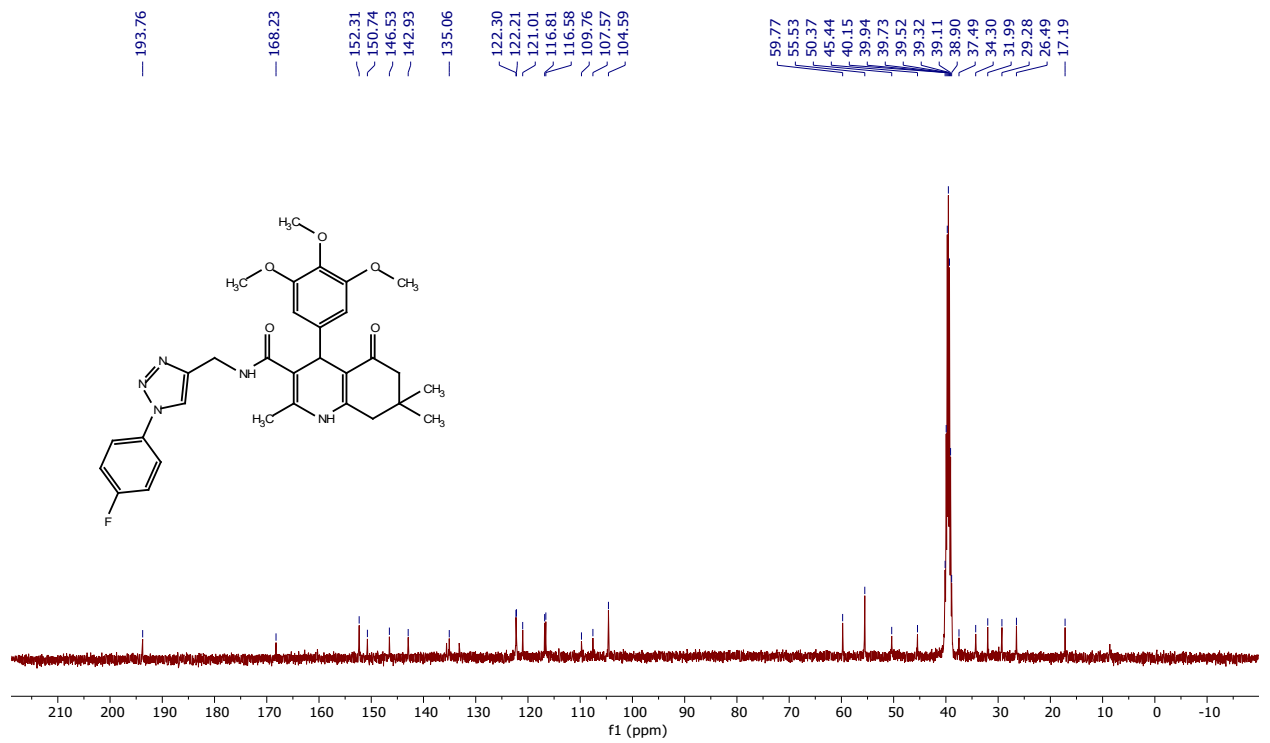

# NMR spectrum of compound J9

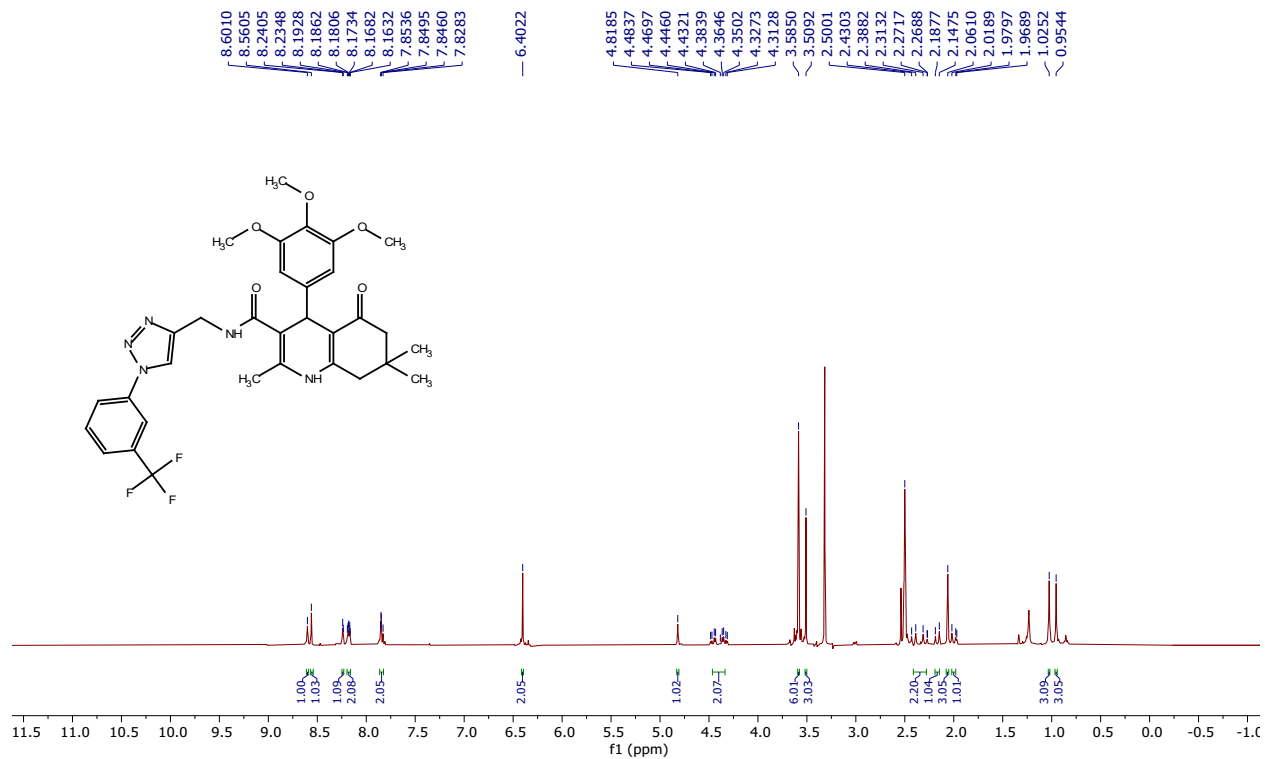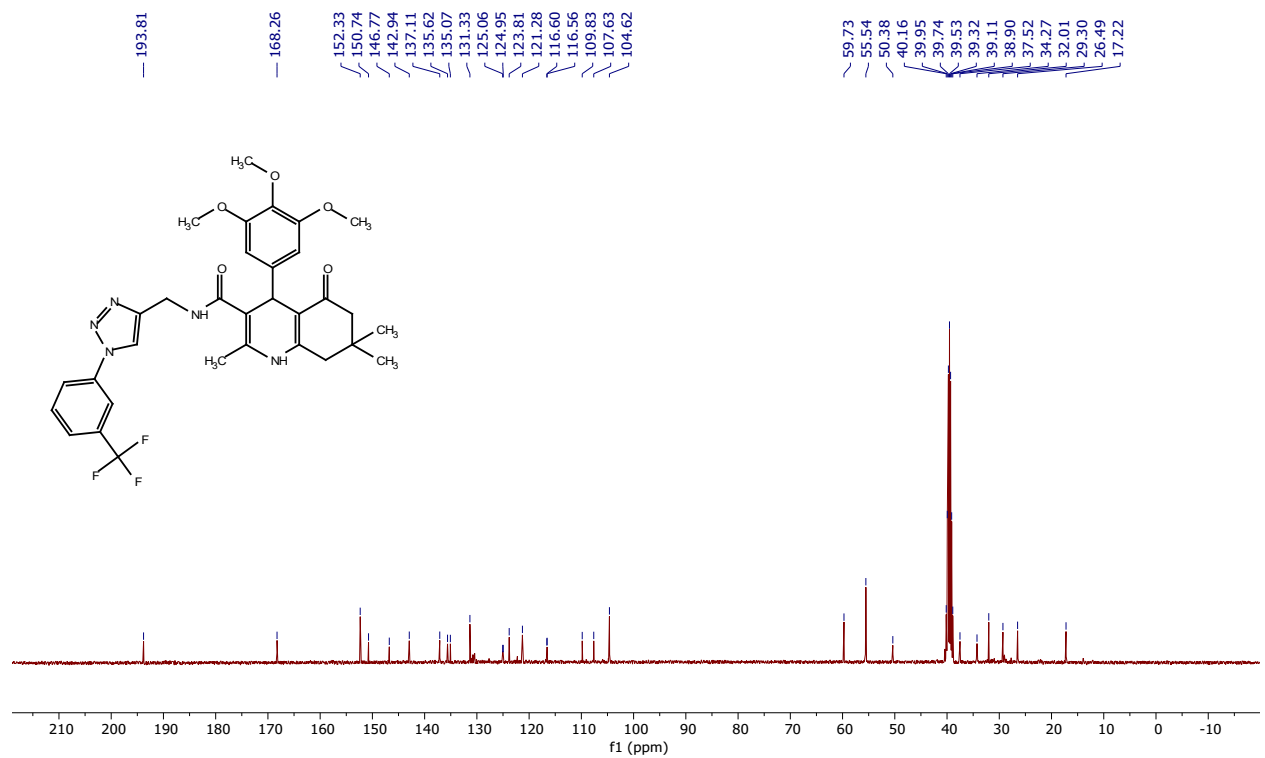



# NMR spectrum of compound J10

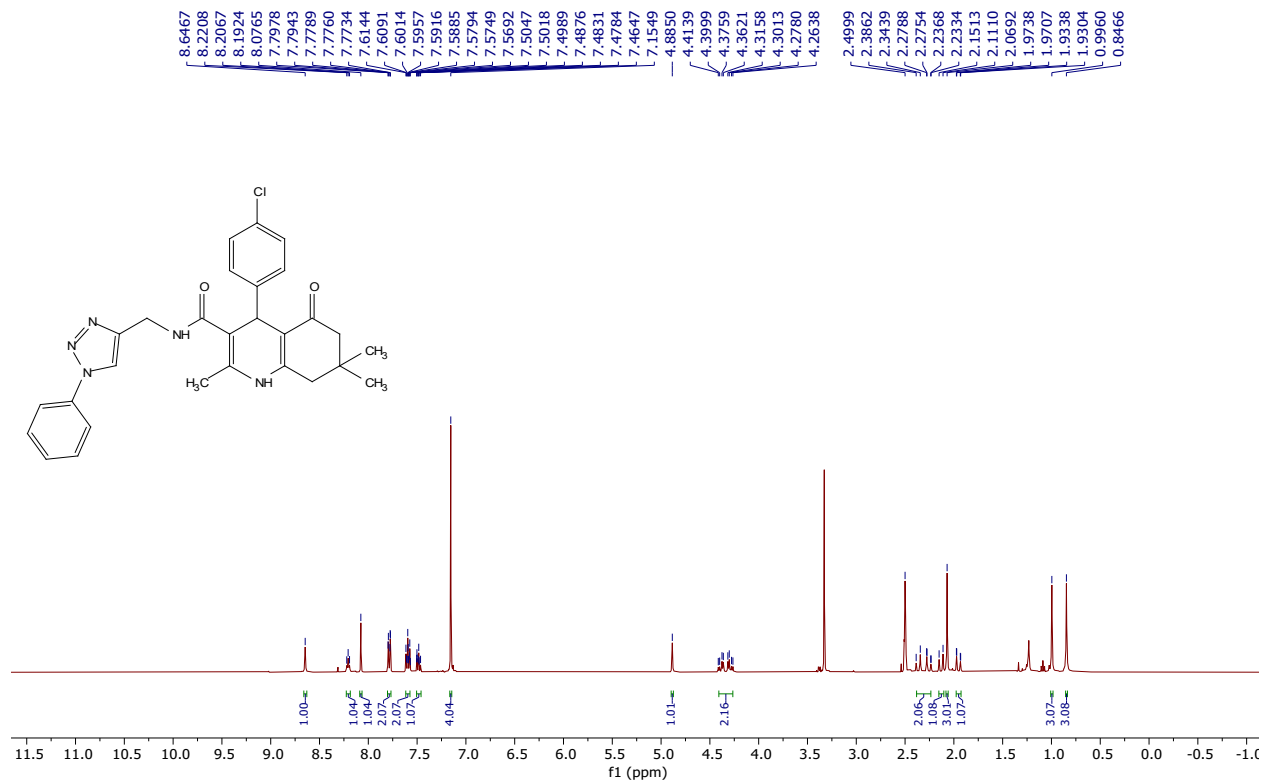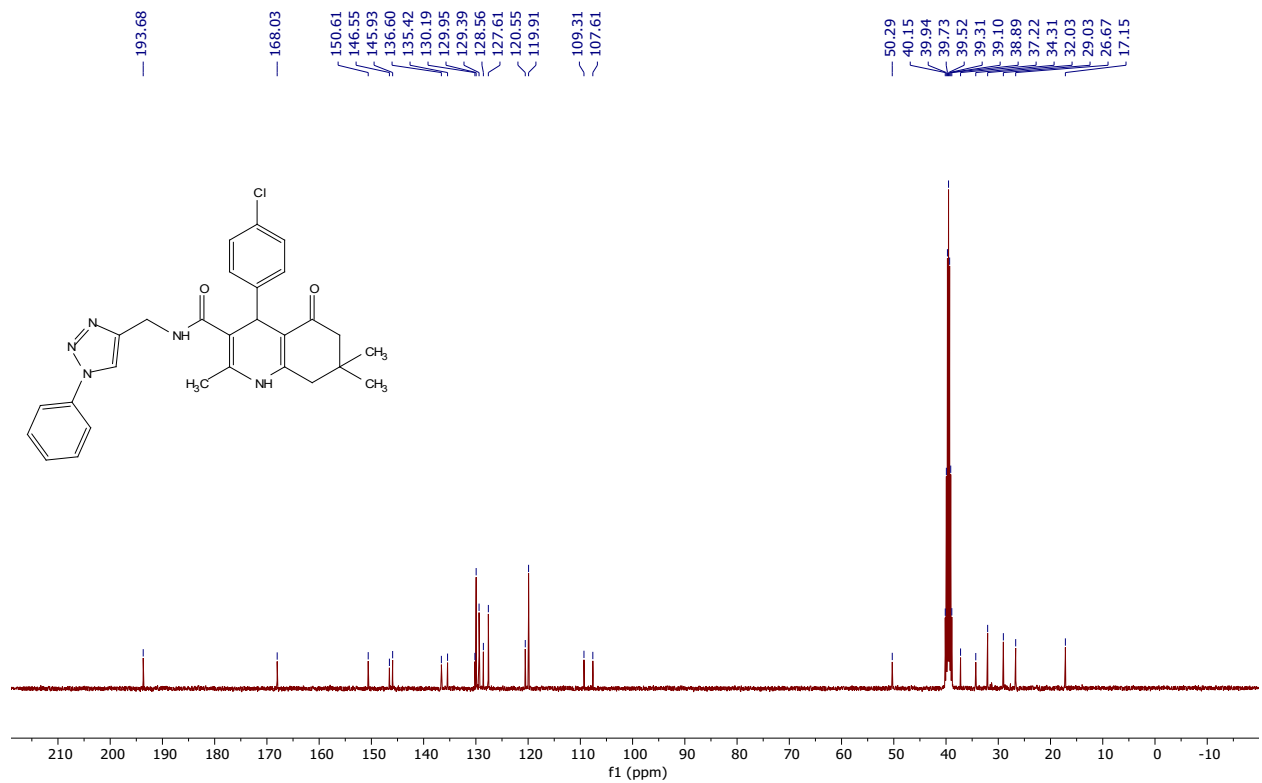

# NMR spectrum of compound J11

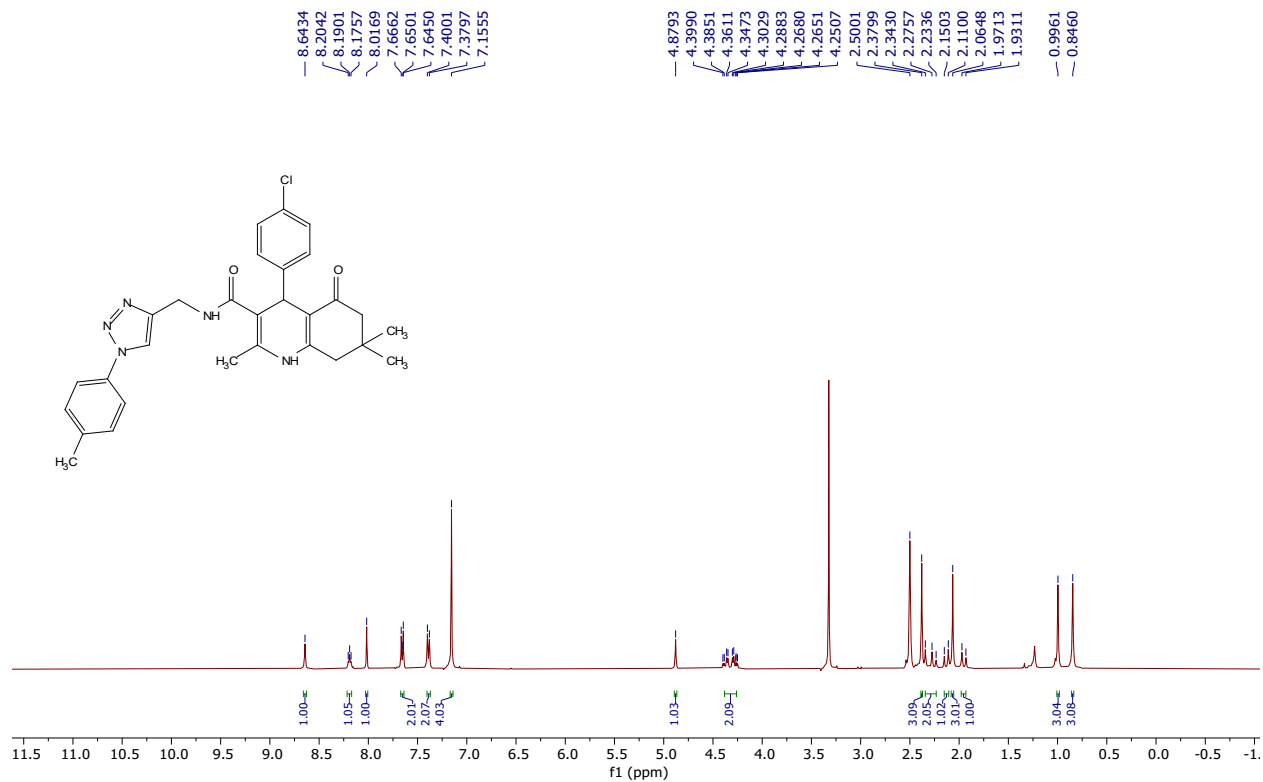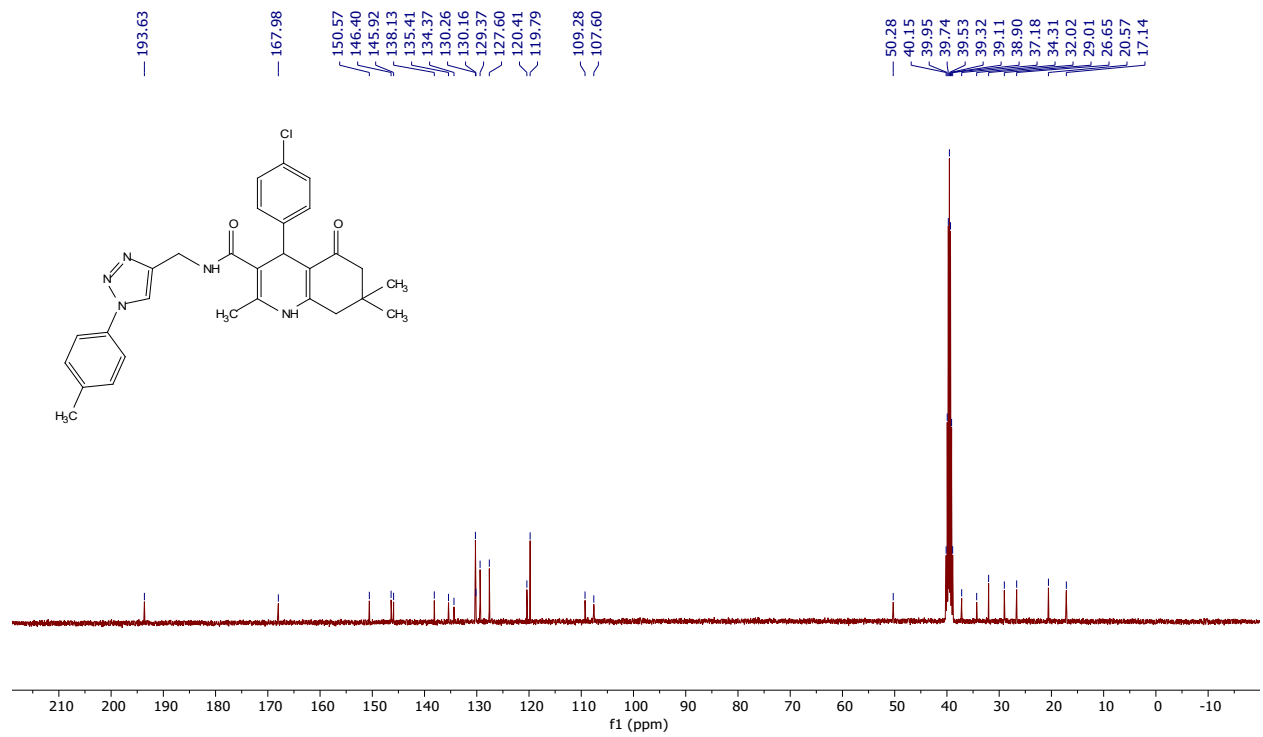

NMR spectrum of compound J12

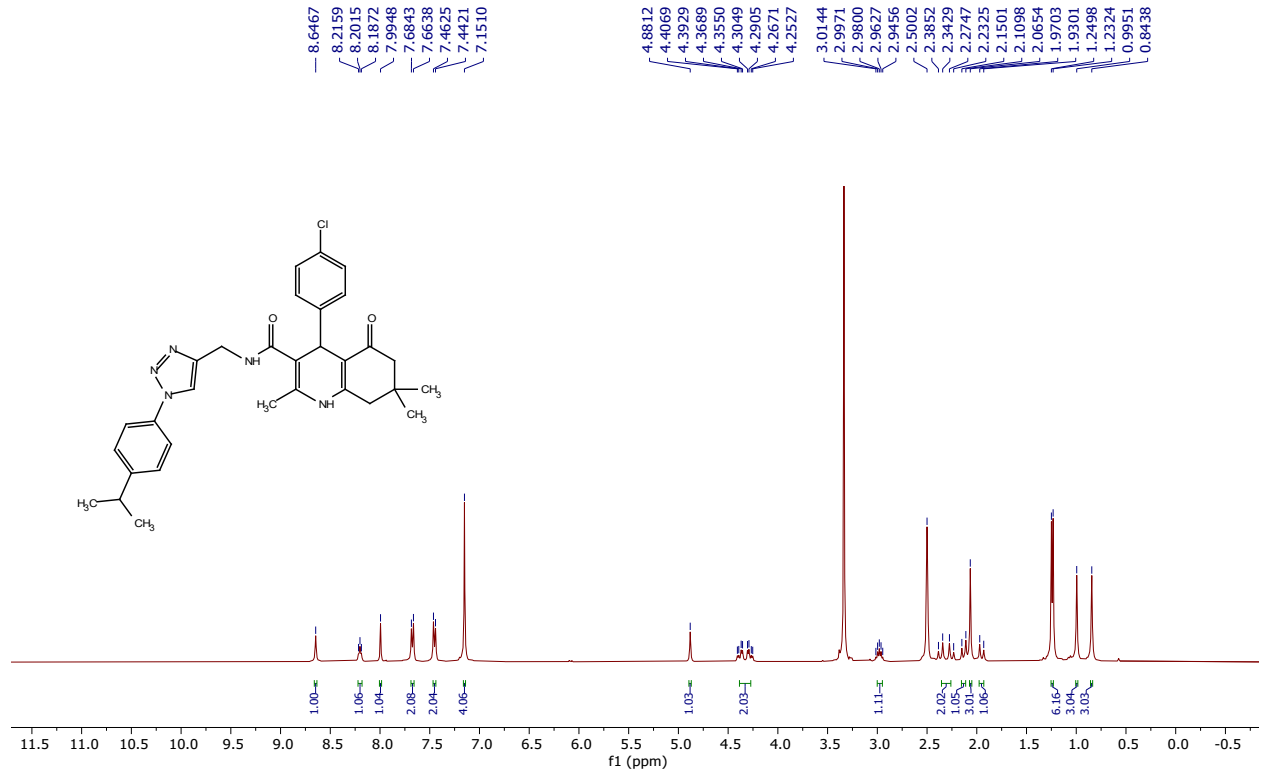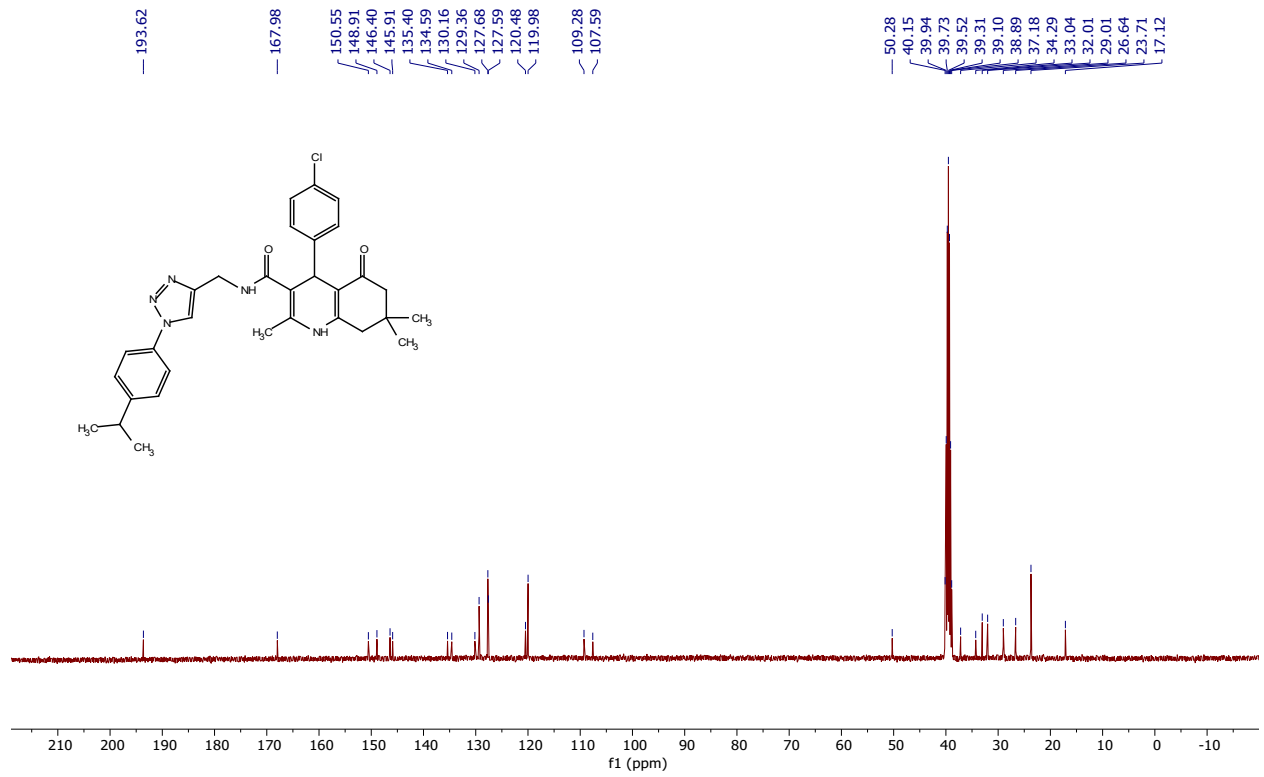

NMR spectrum of compound J13

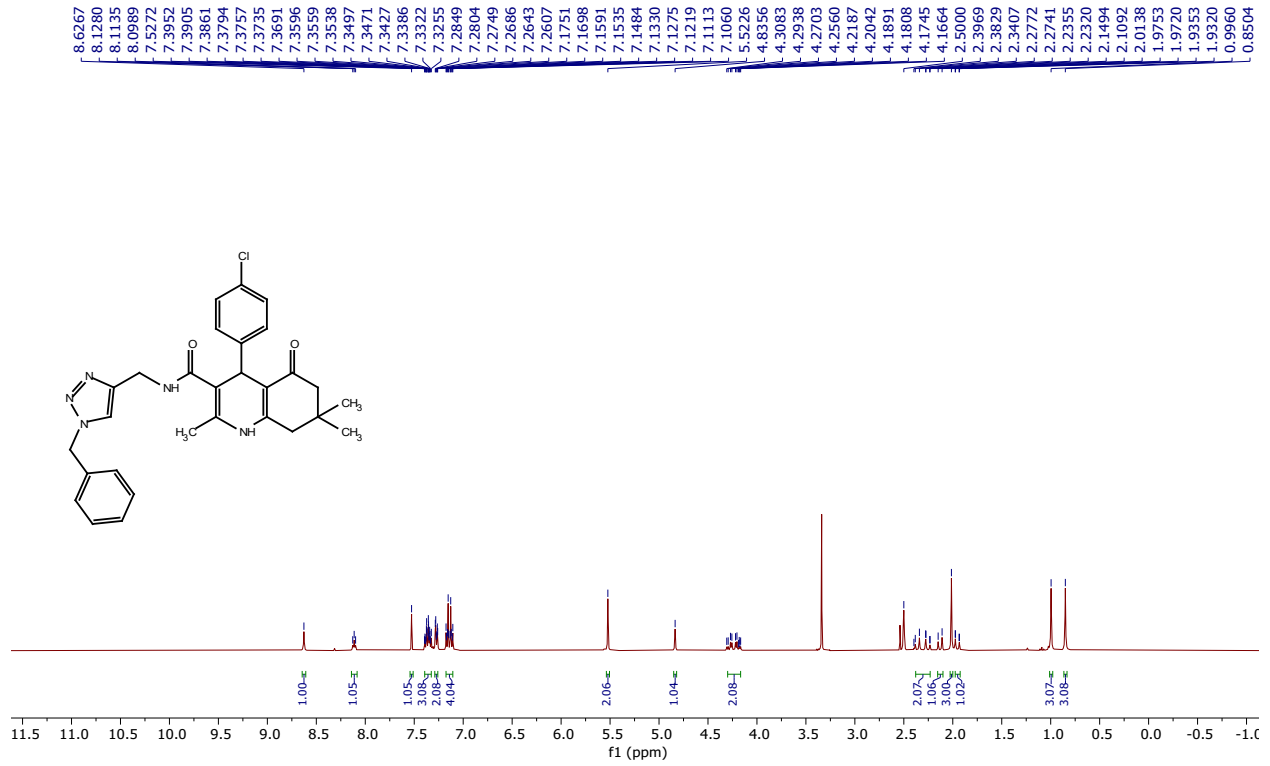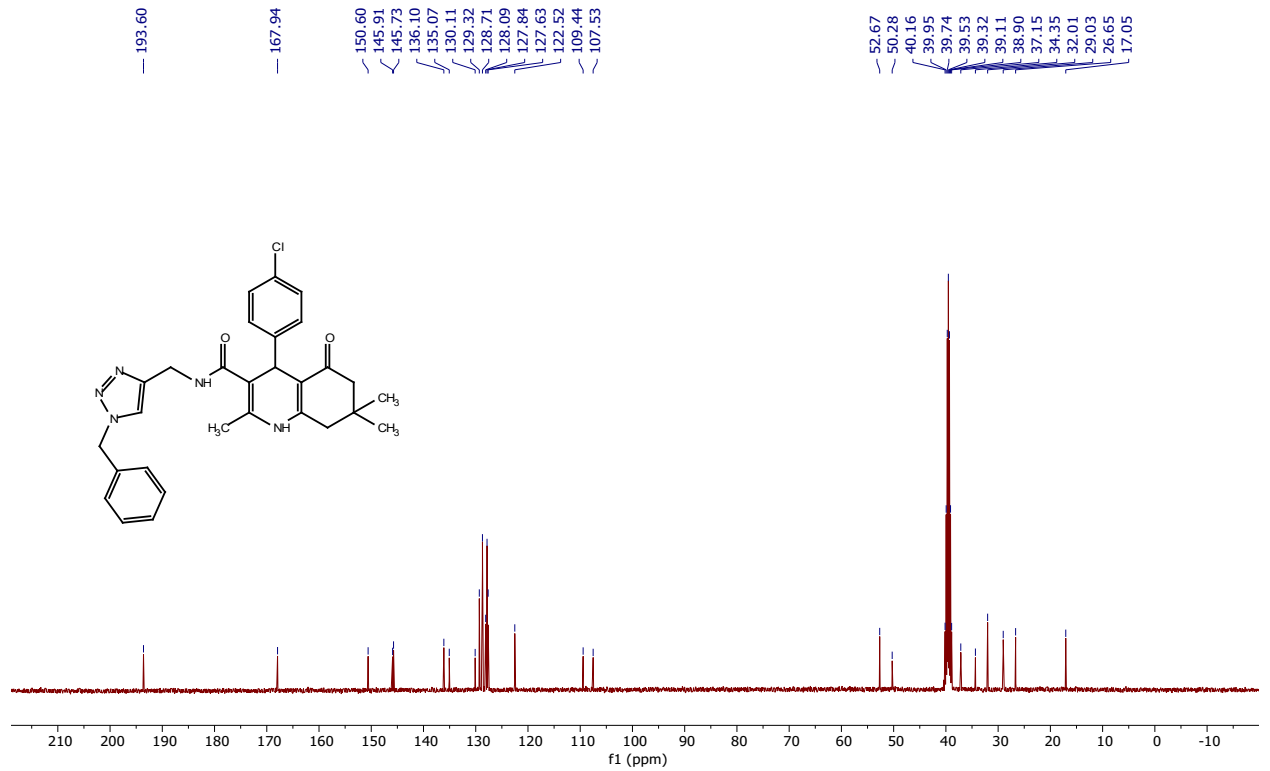

NMR spectrum of compound J14

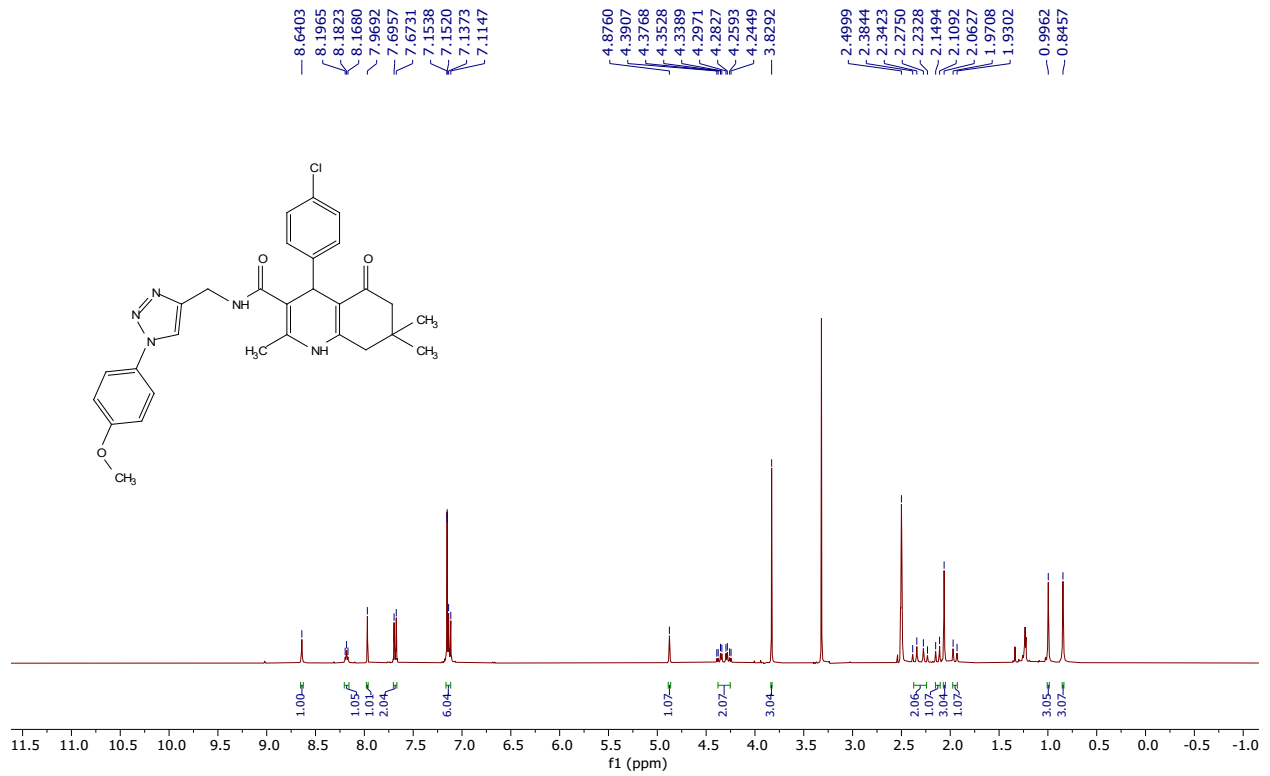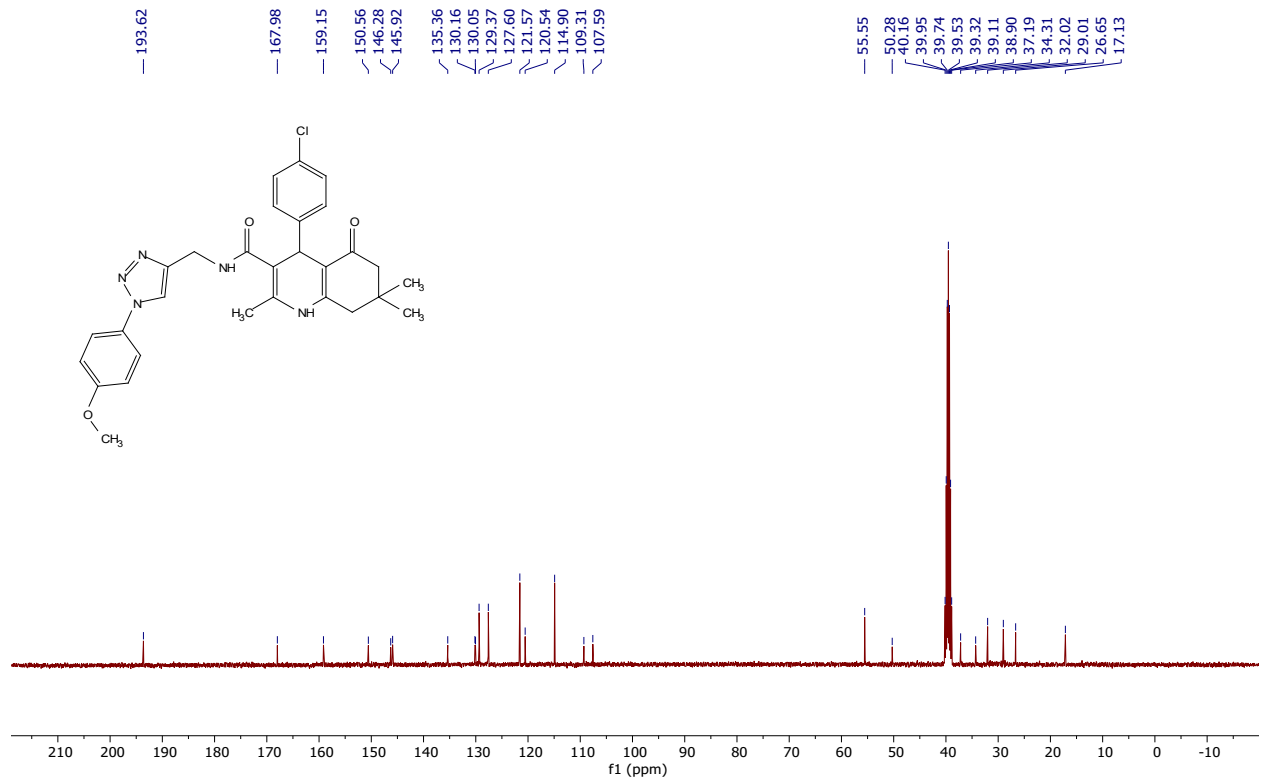

NMR spectrum of compound J15

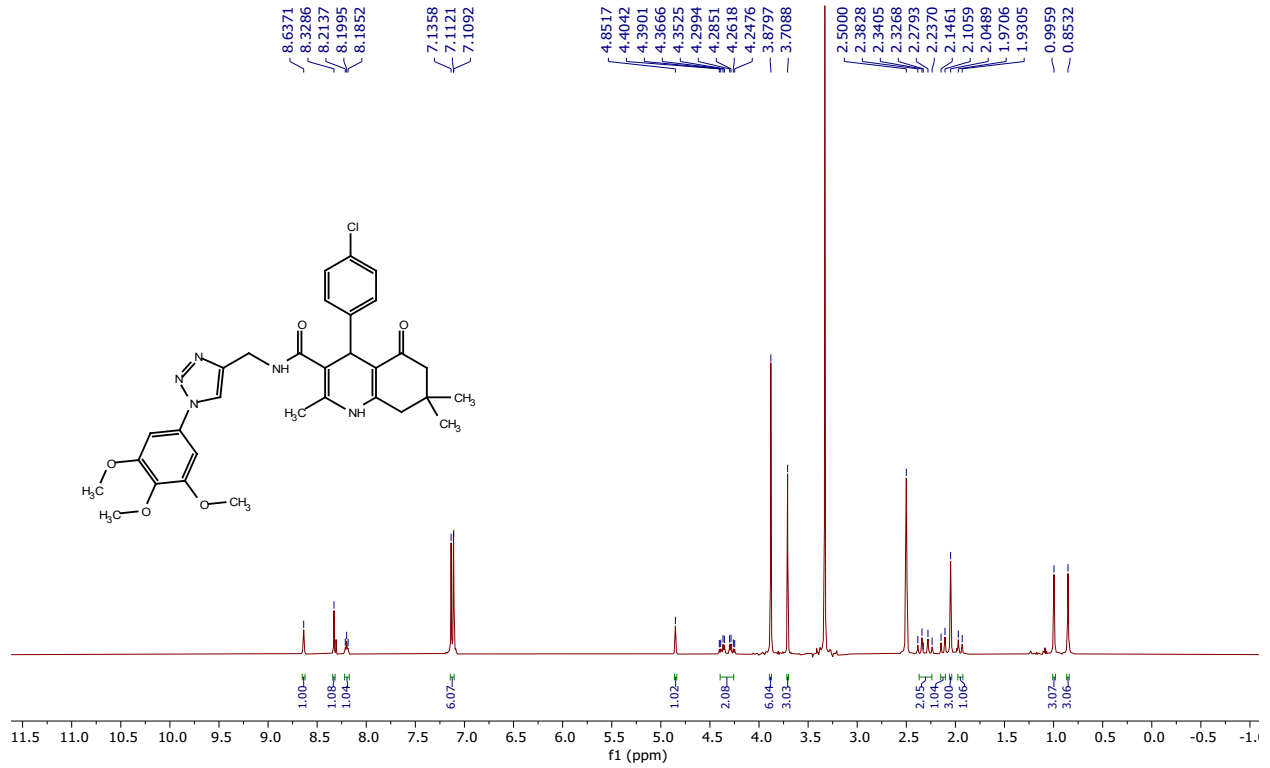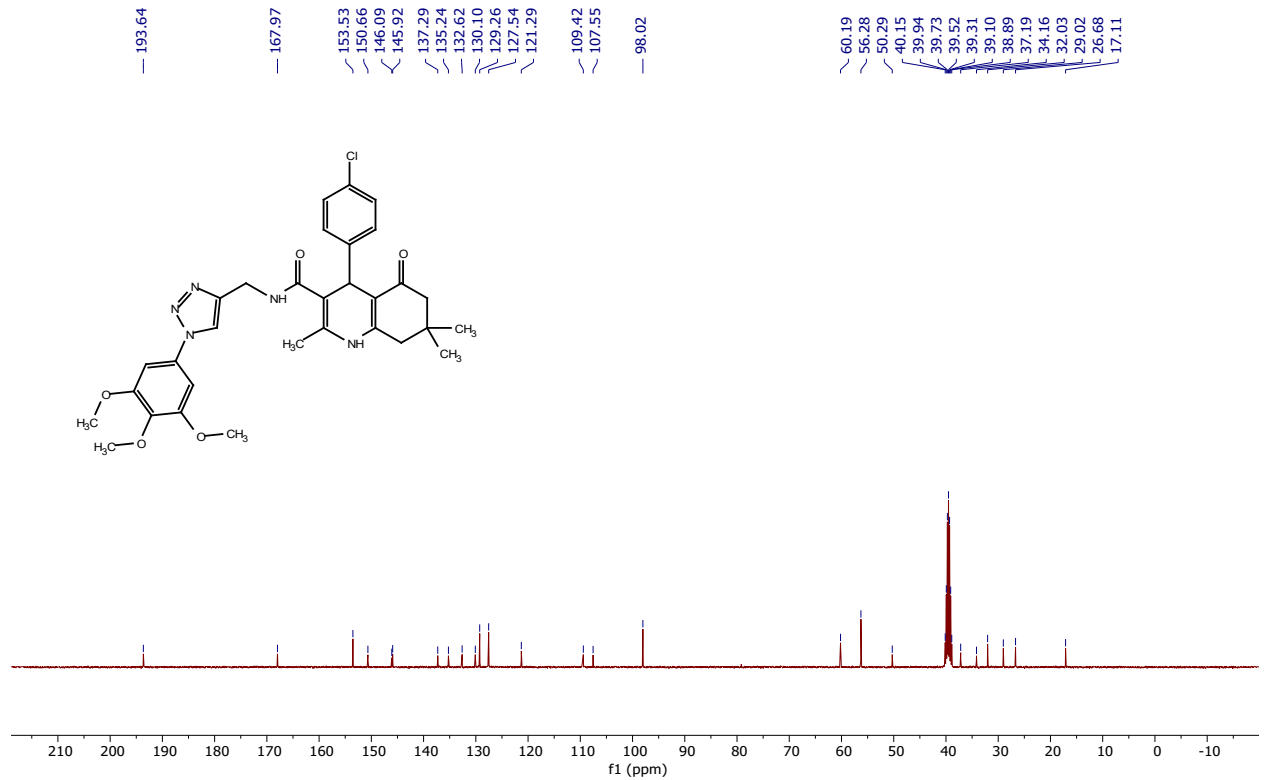

# NMR spectrum of compound J16

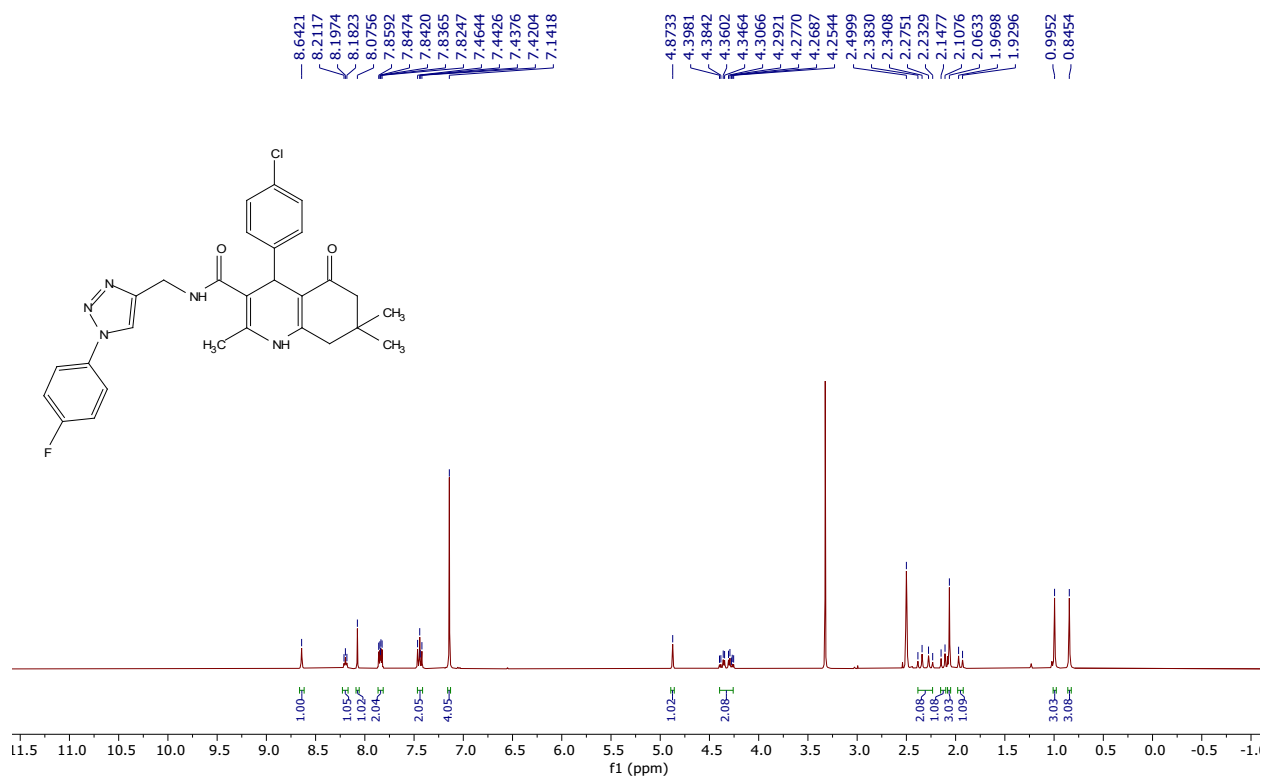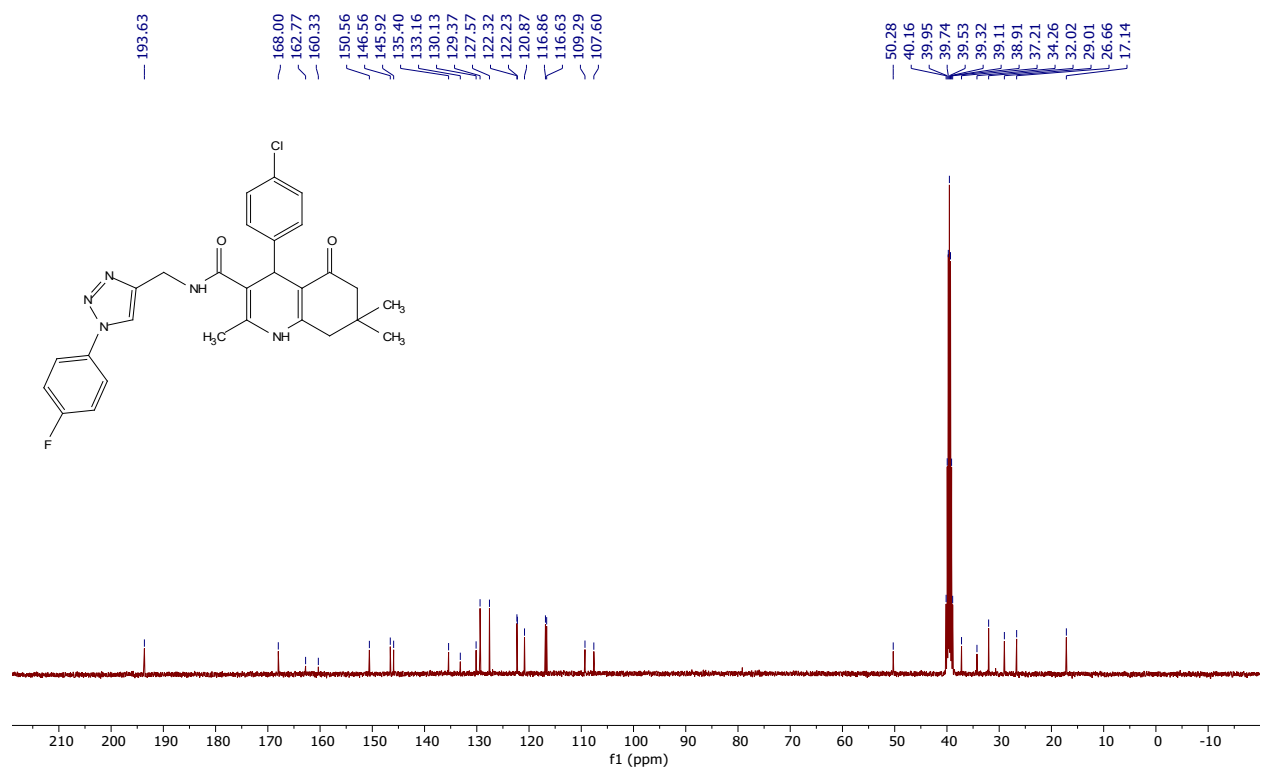

# NMR spectrum of compound J17

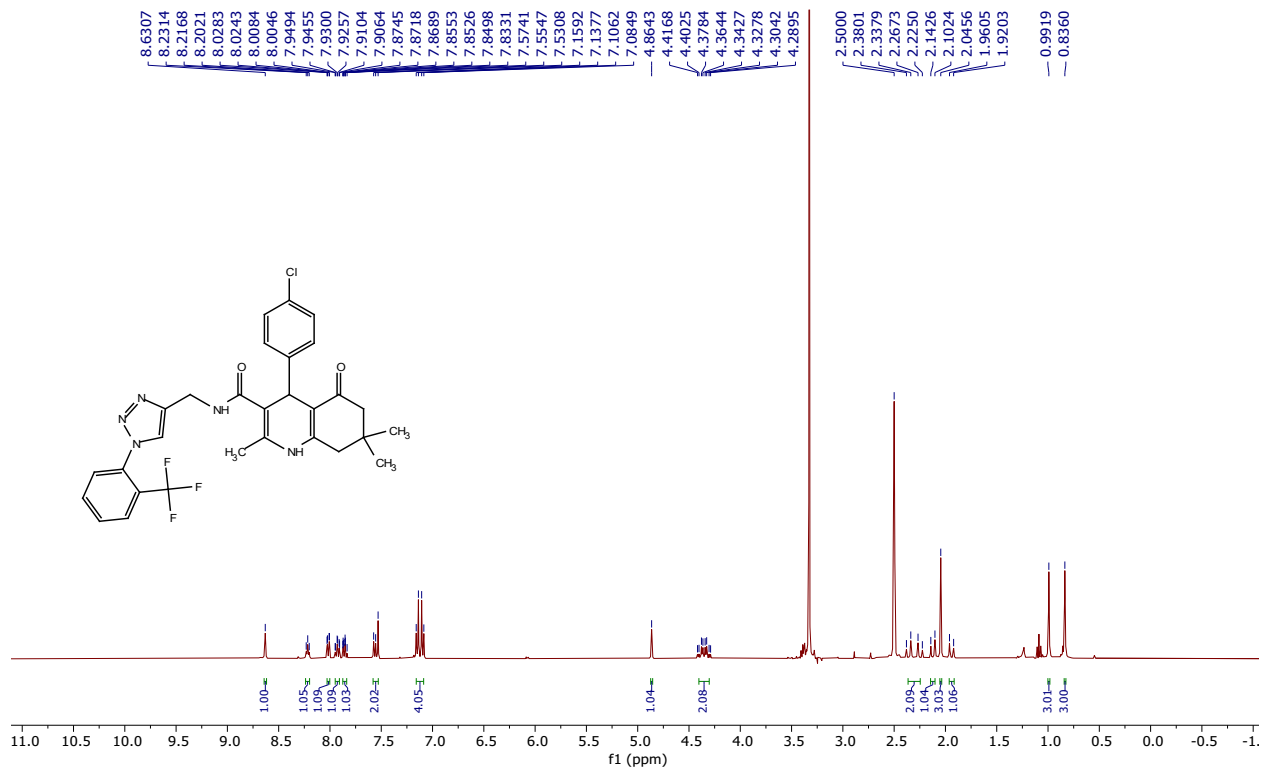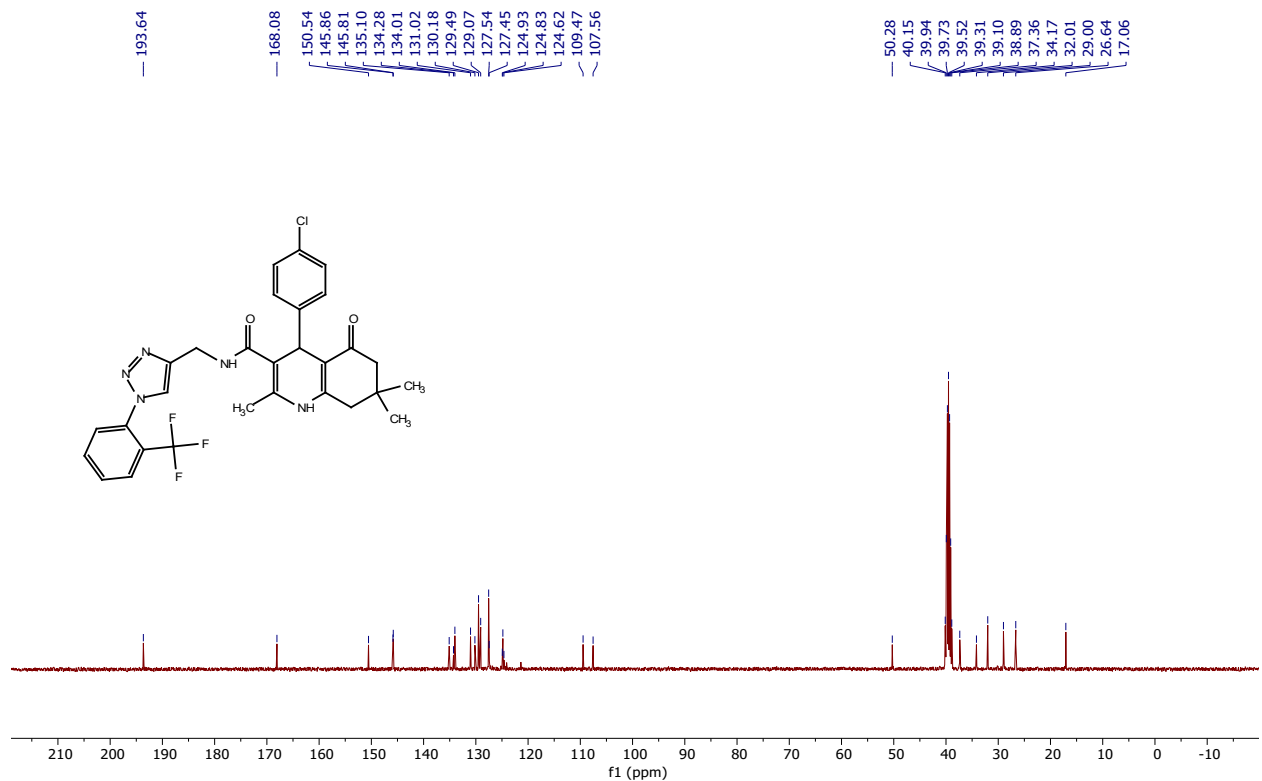



NMR spectrum of compound J18

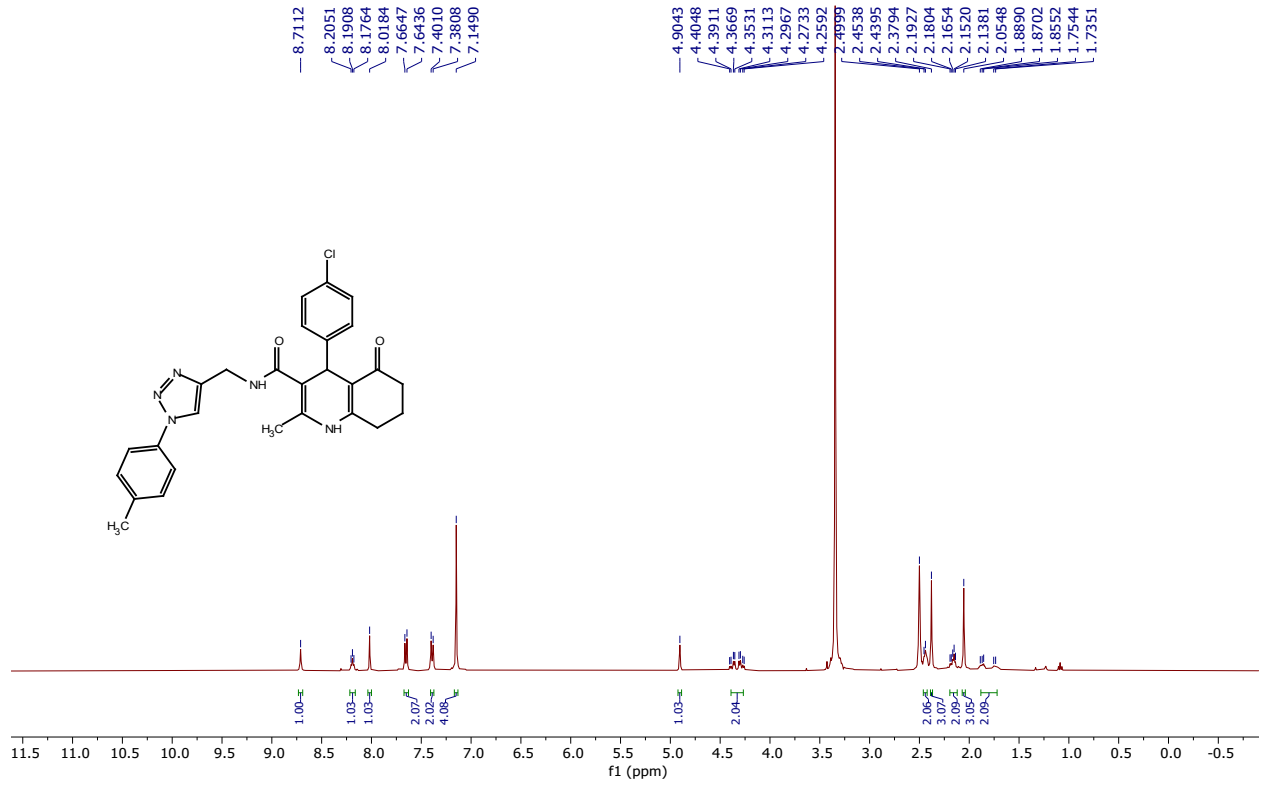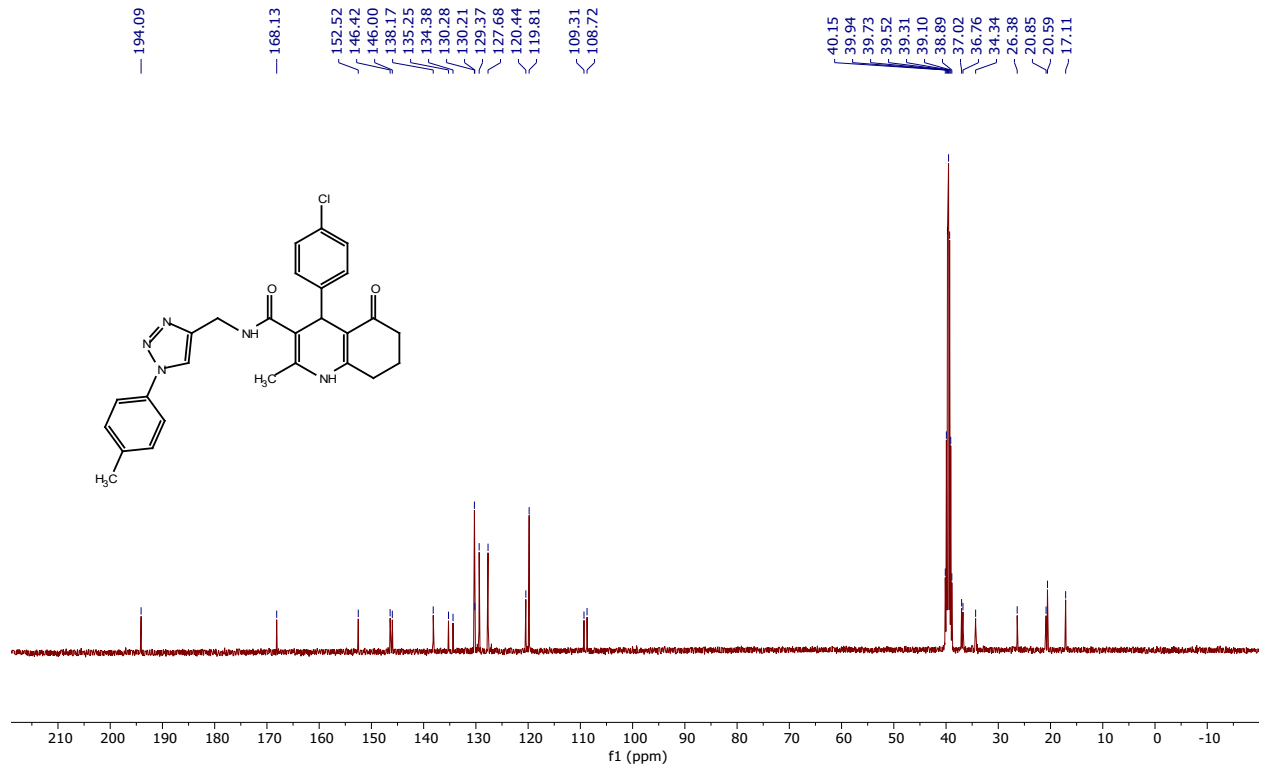

NMR spectrum of compound J19

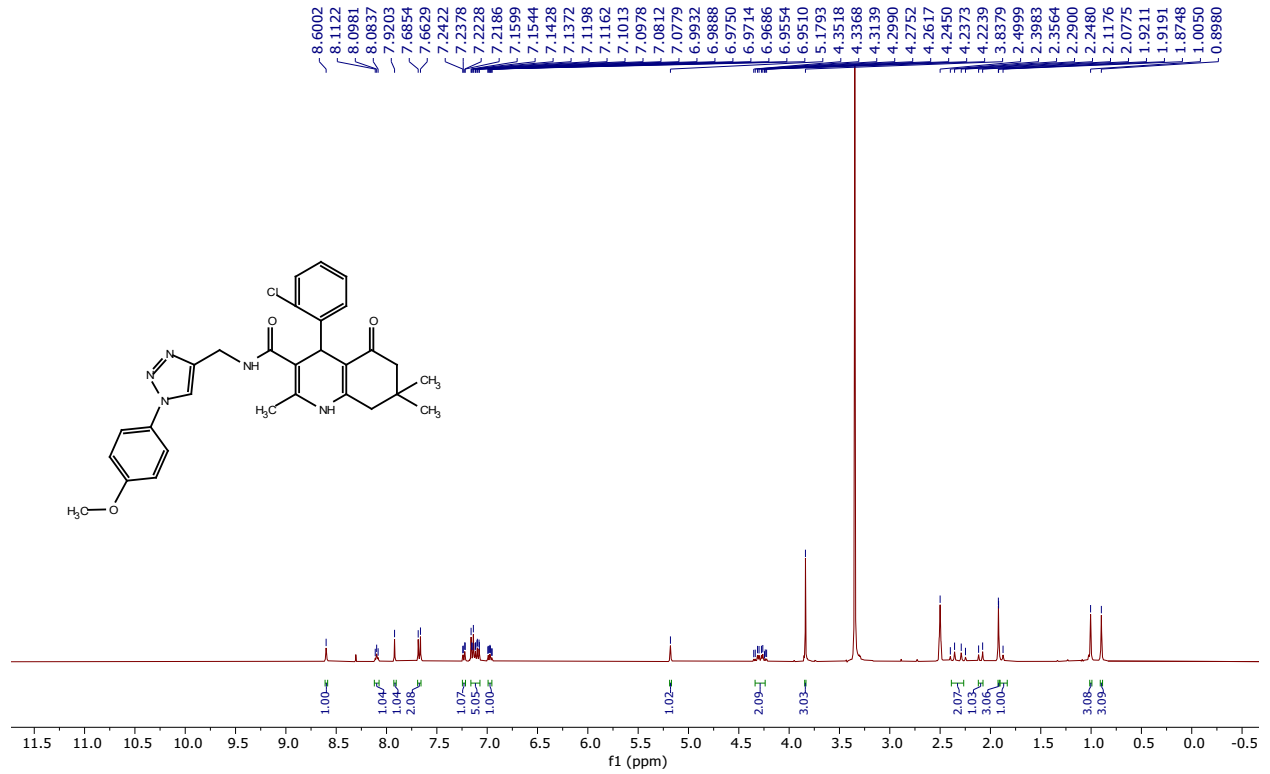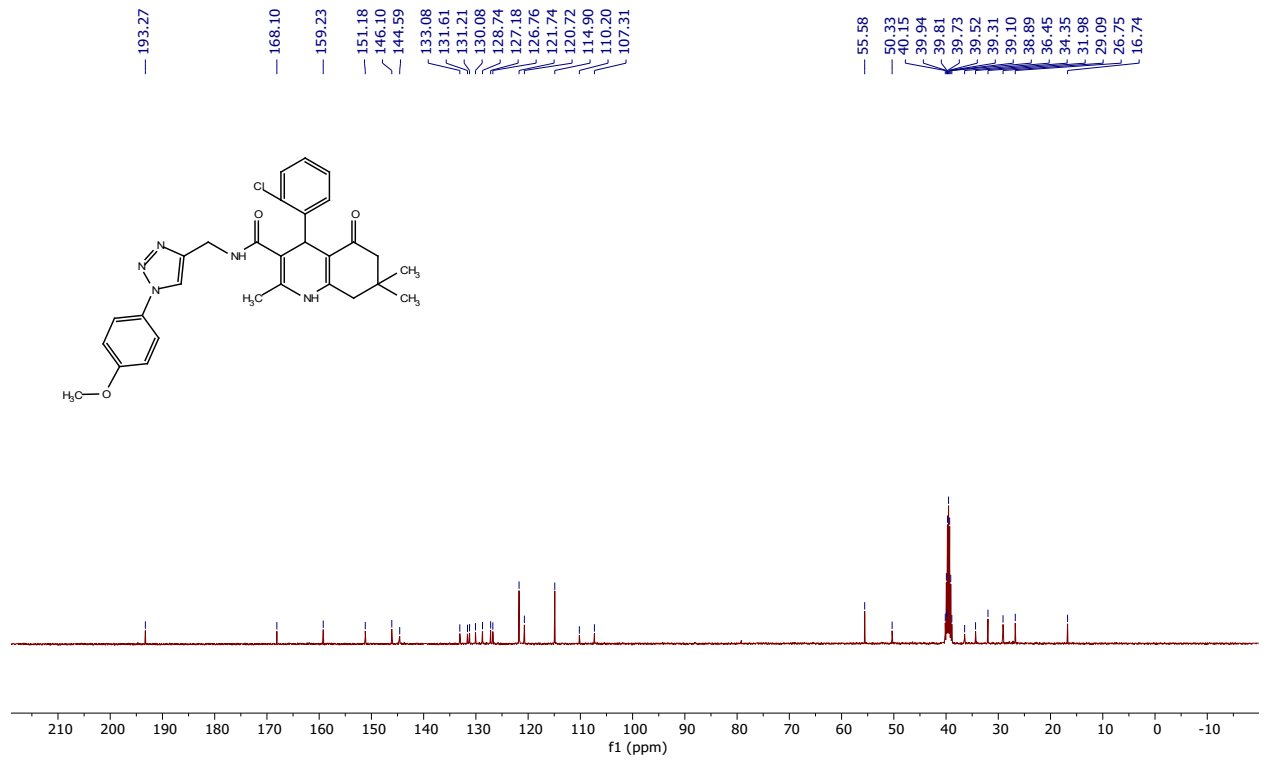

# NMR spectrum of compound J20

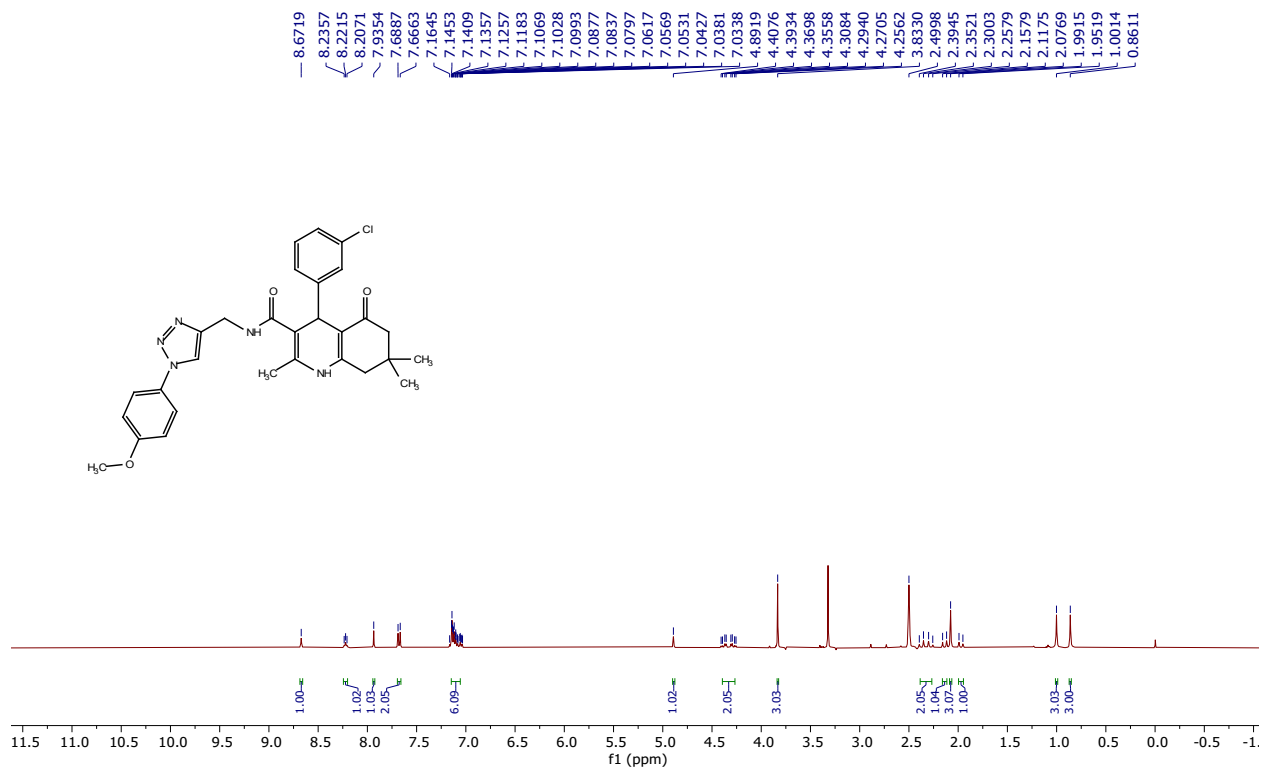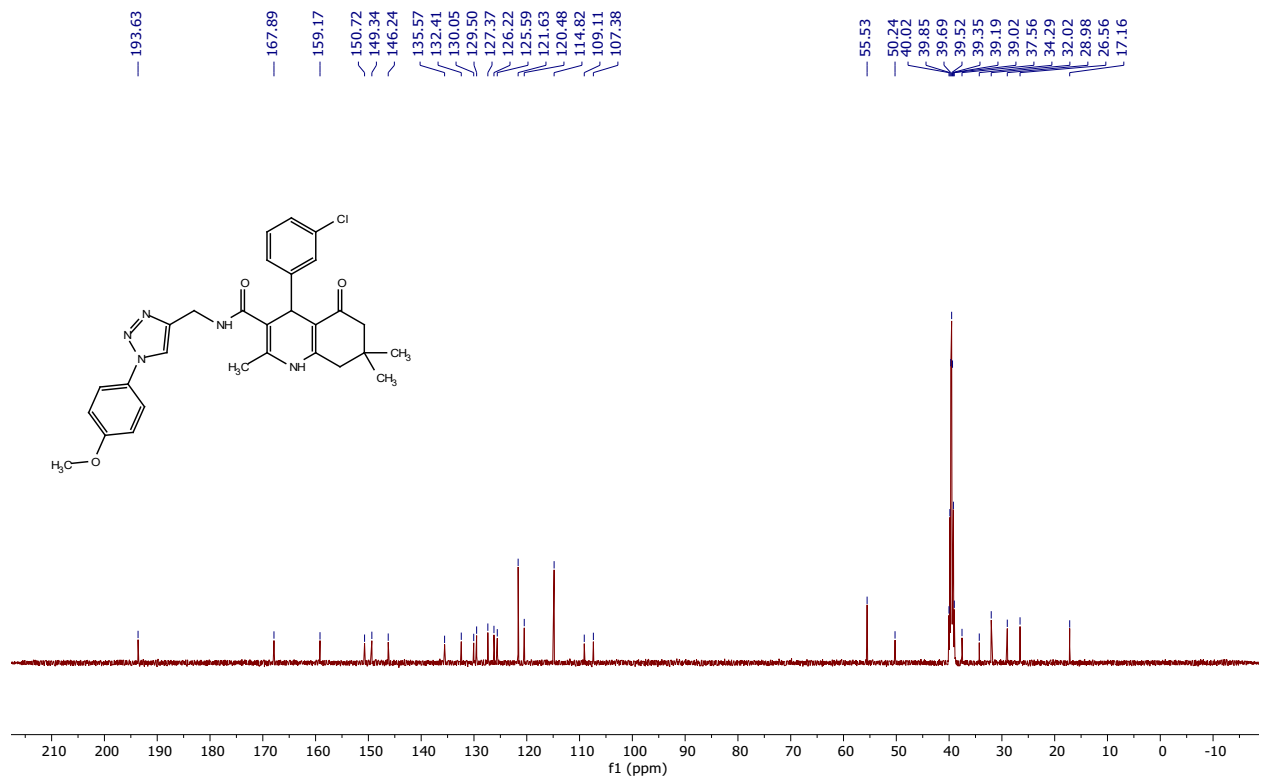

# NMR spectrum of compound J21

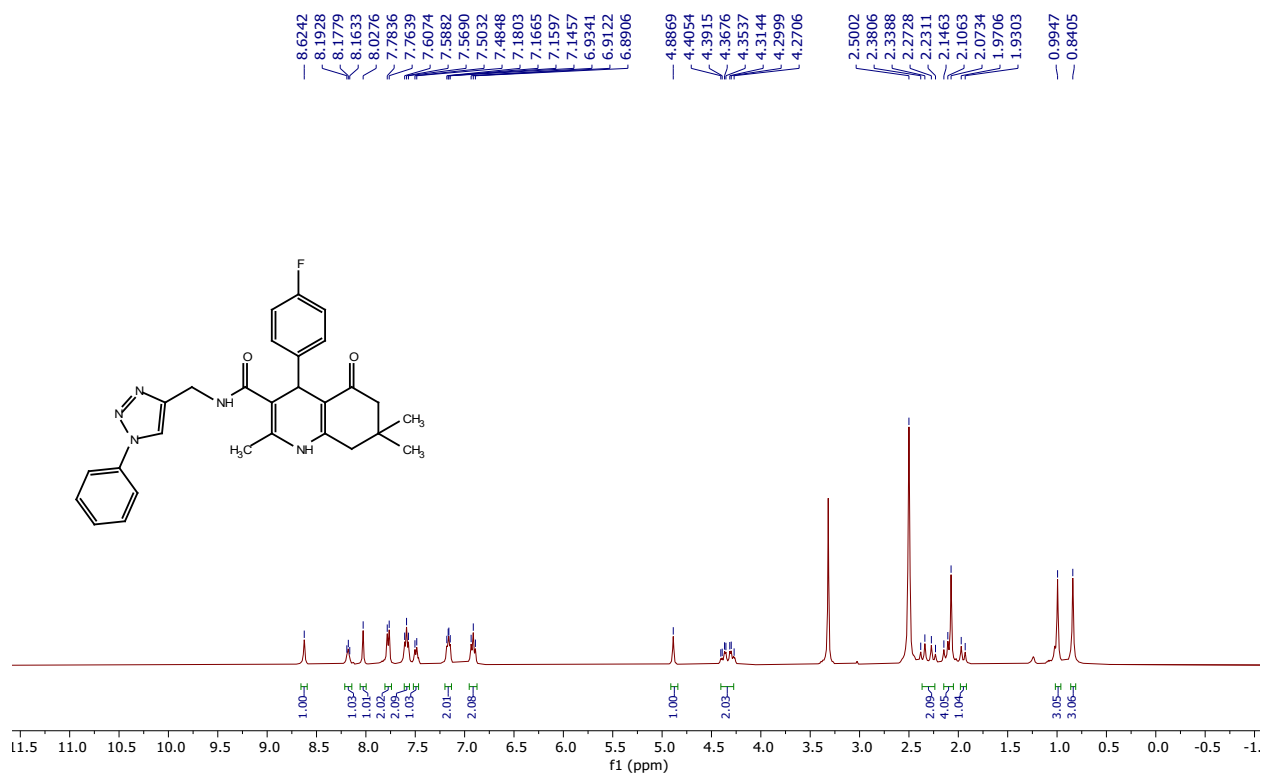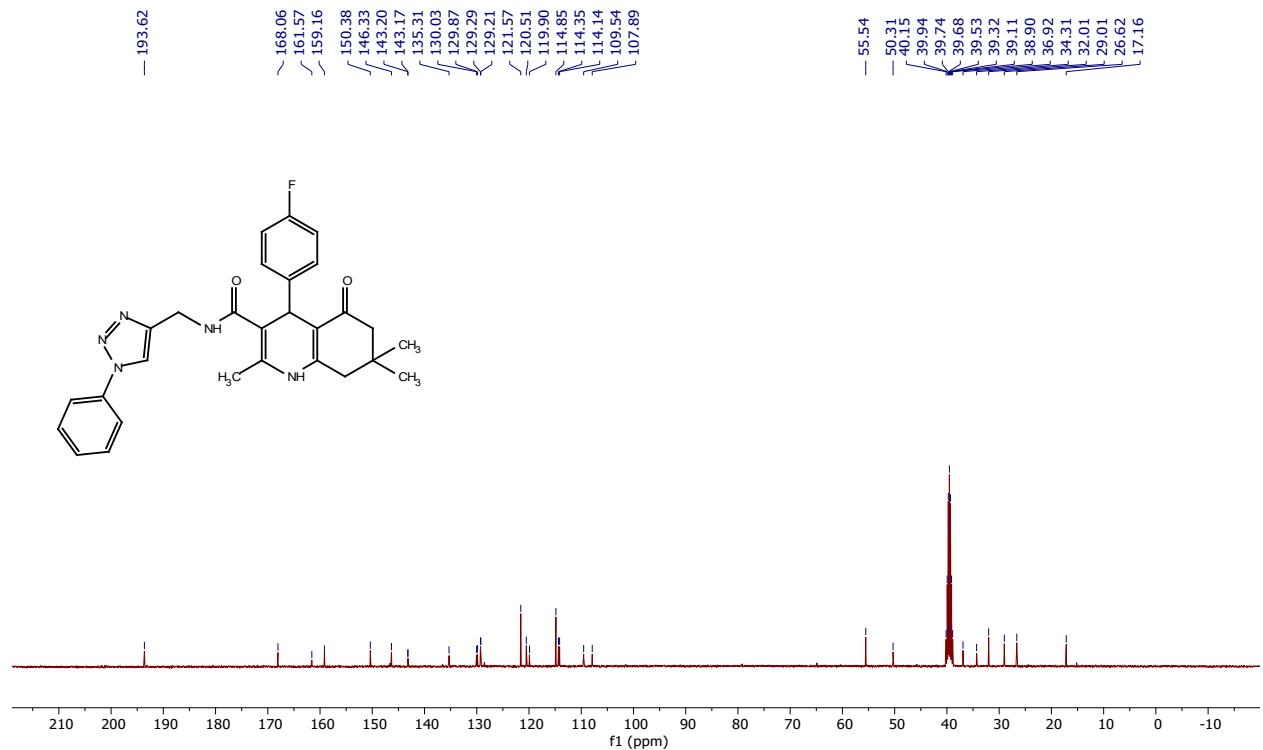

# NMR spectrum of compound J22

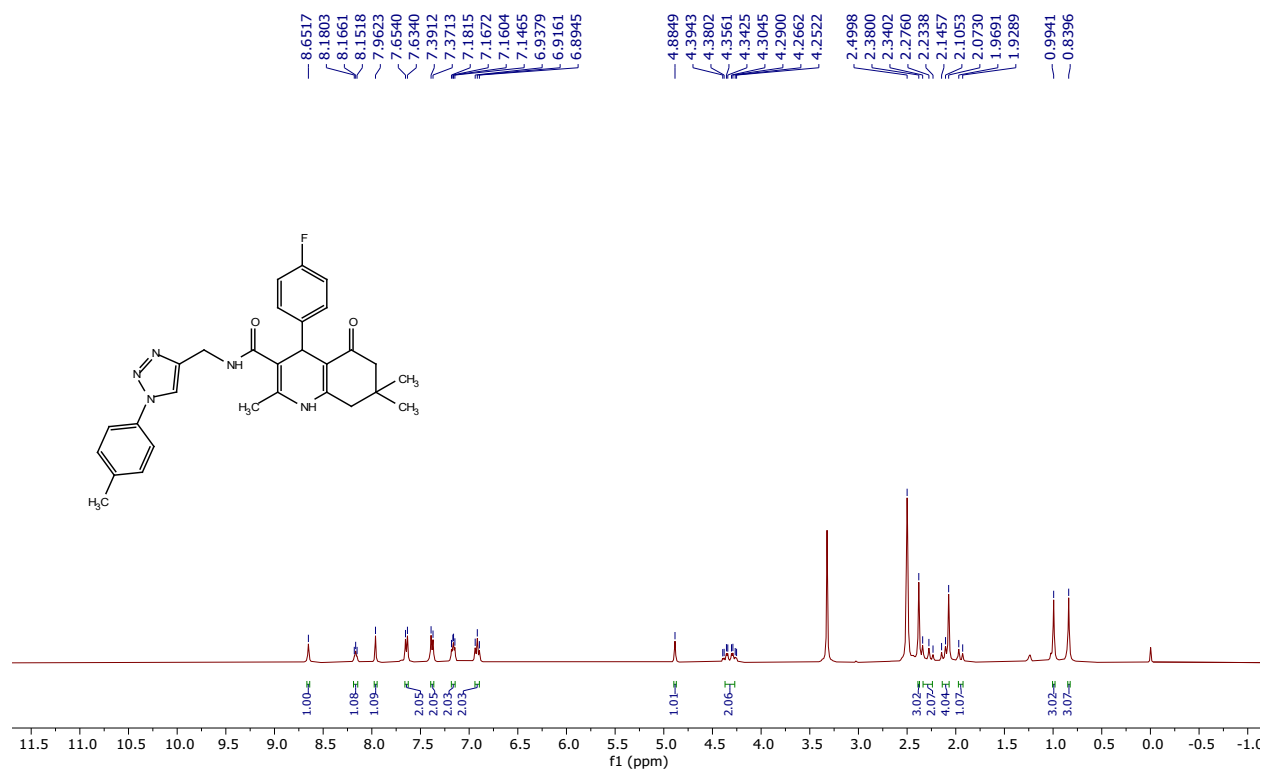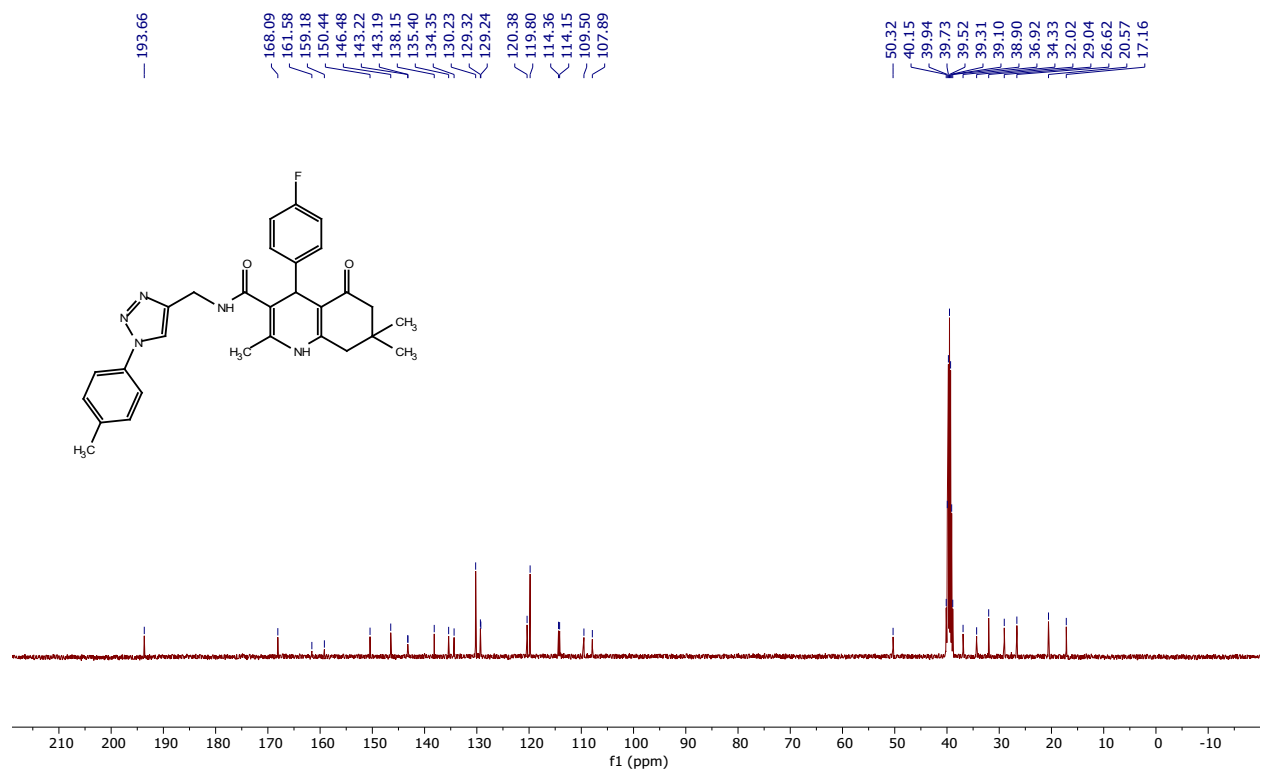

NMR spectrum of compound J23

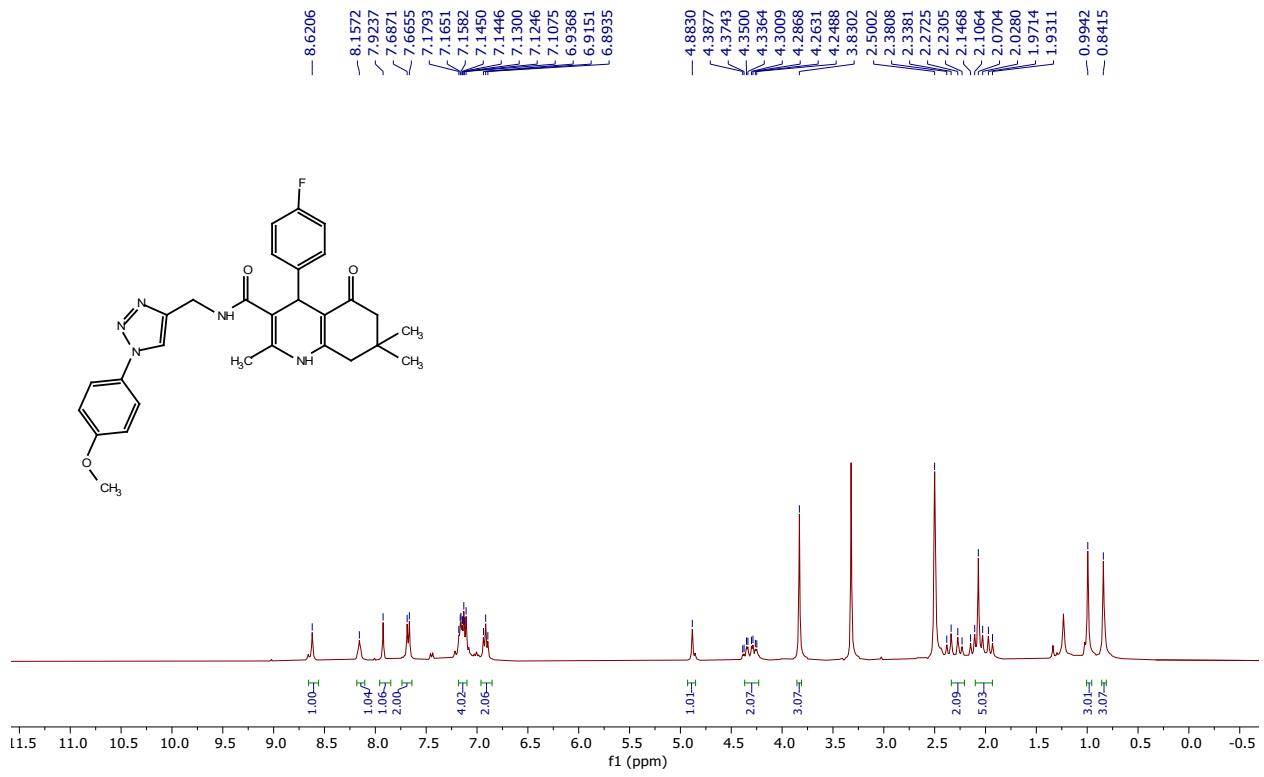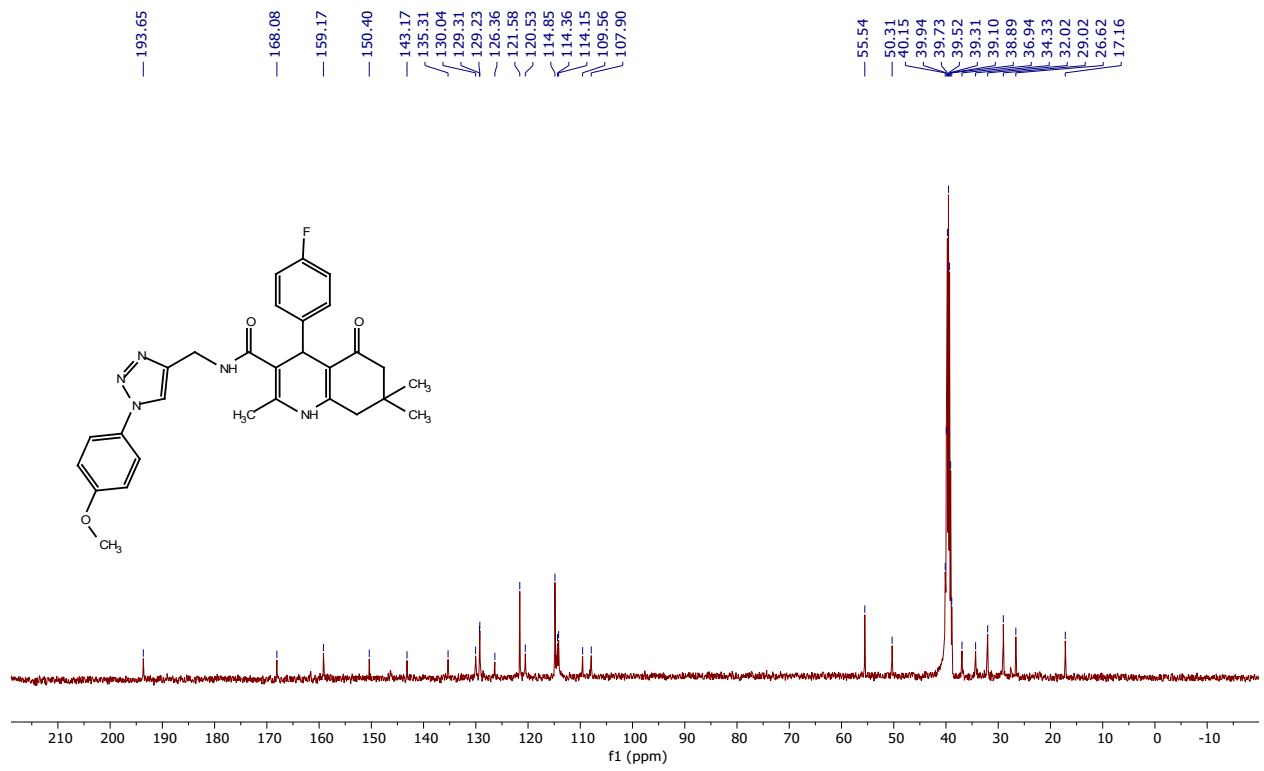

NMR spectrum of compound J24

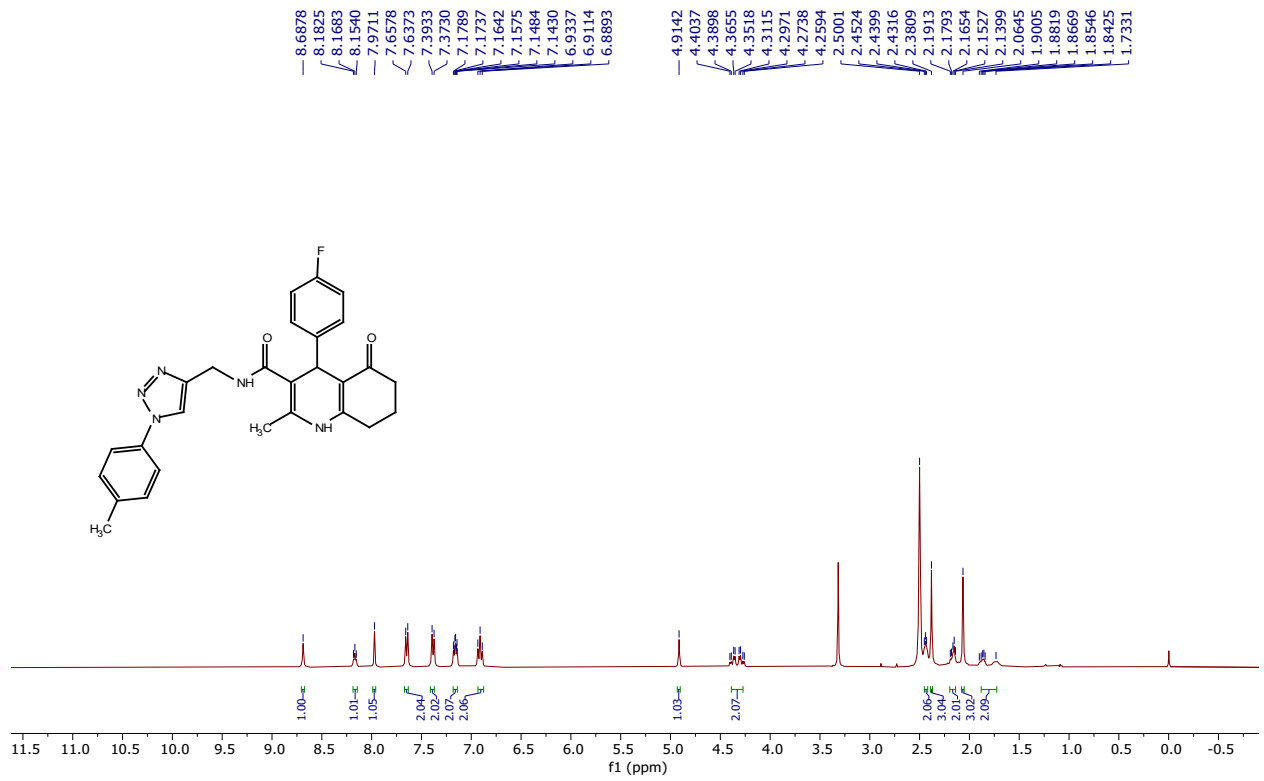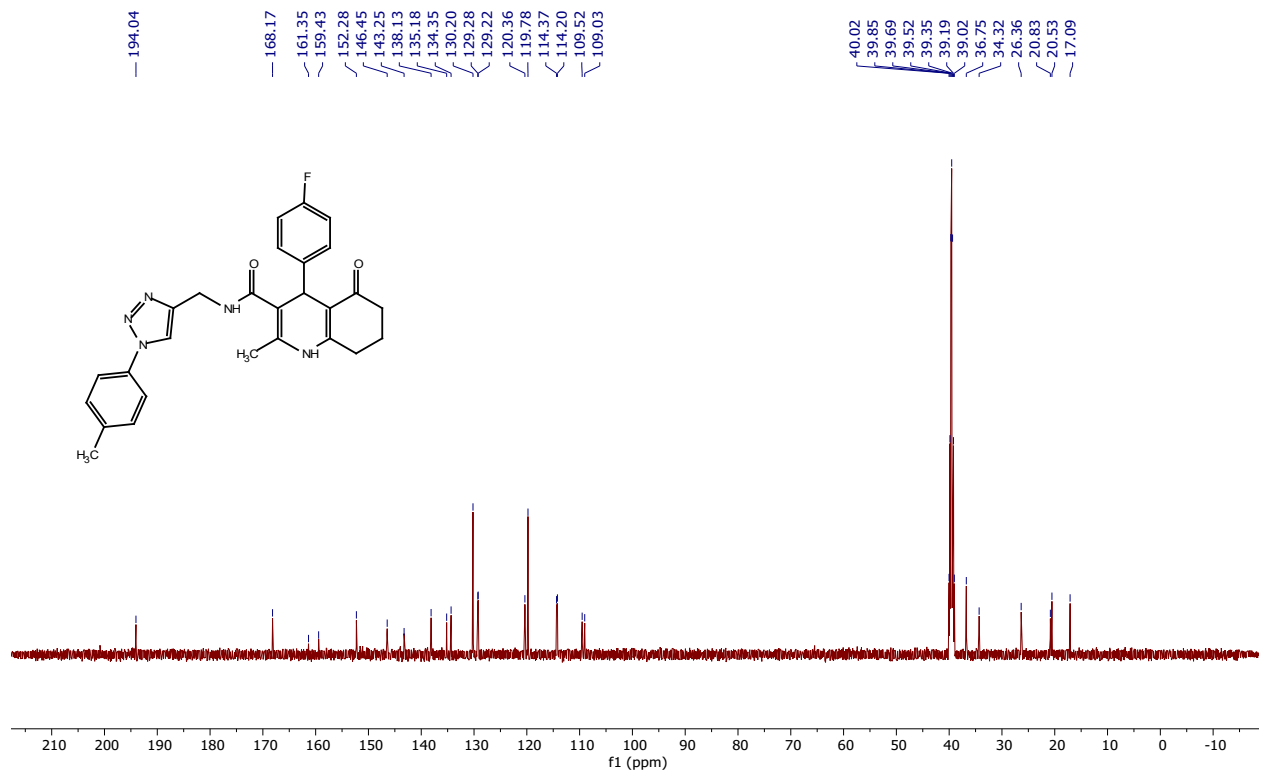

# NMR spectrum of compound J25

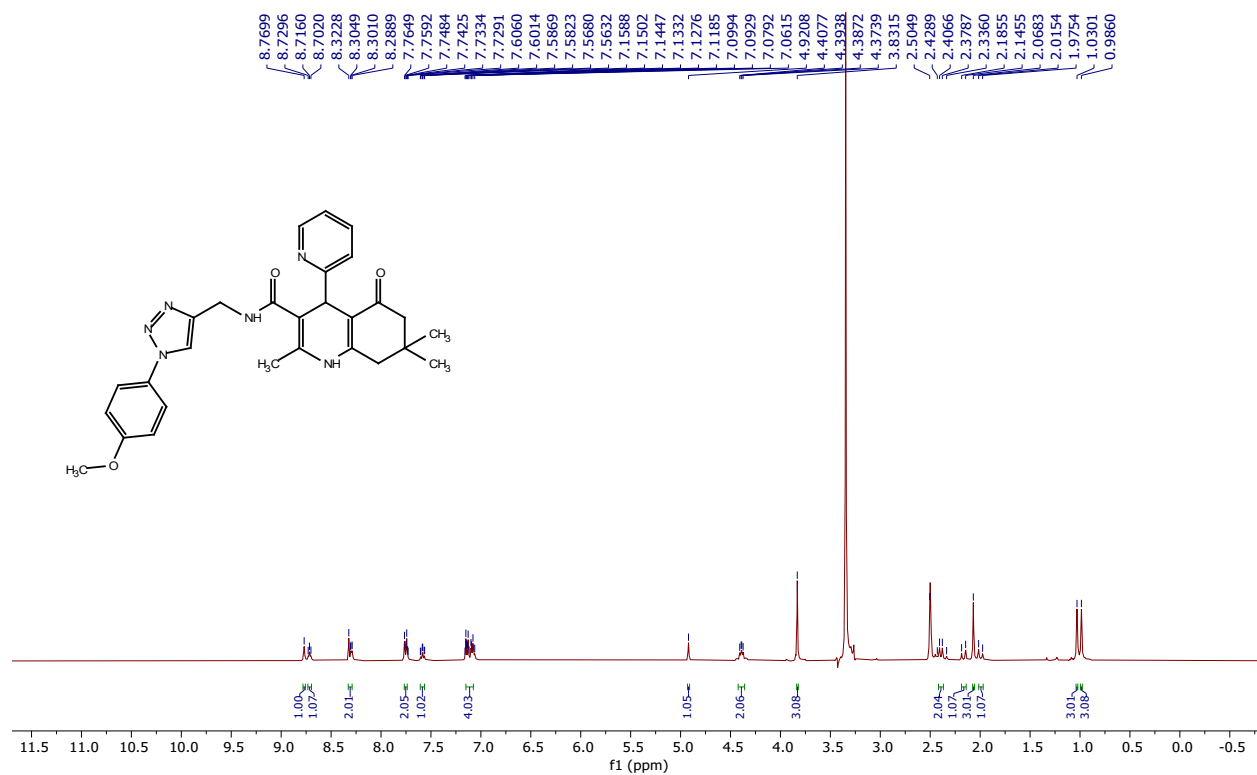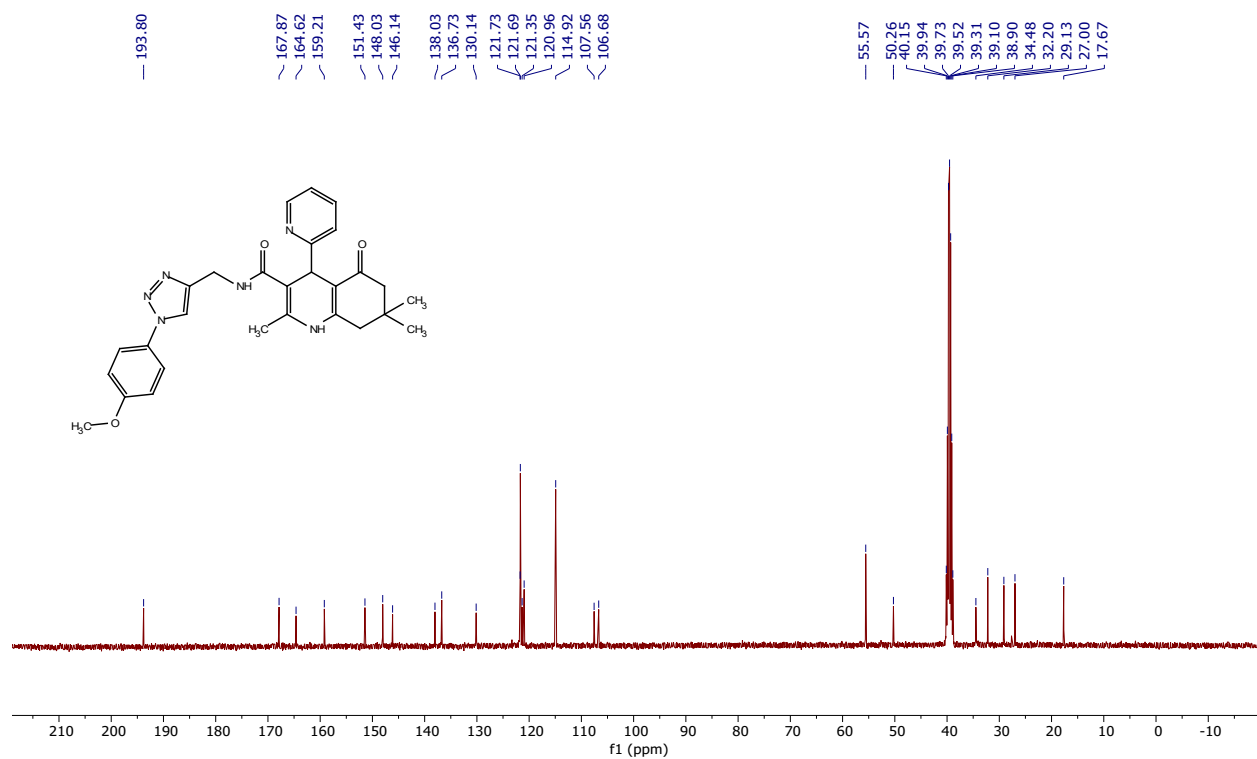



# NMR spectrum of compound K1

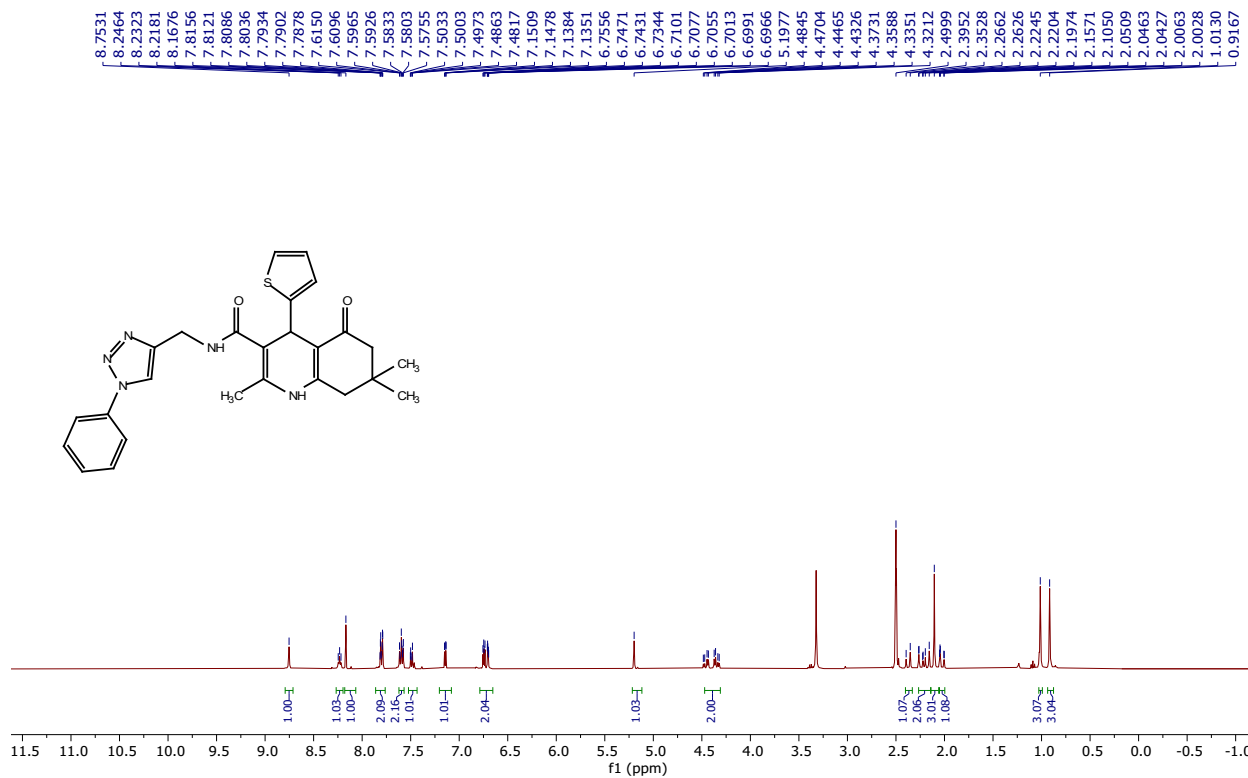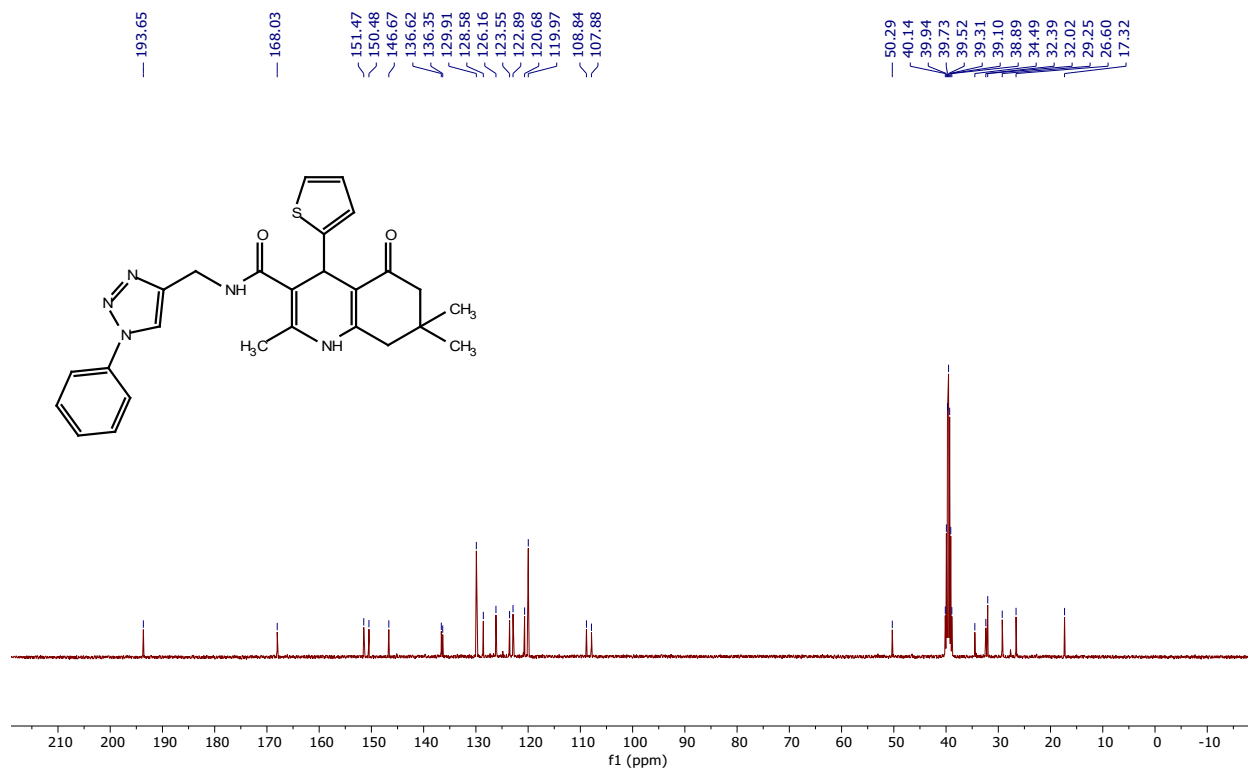

# NMR spectrum of compound K2

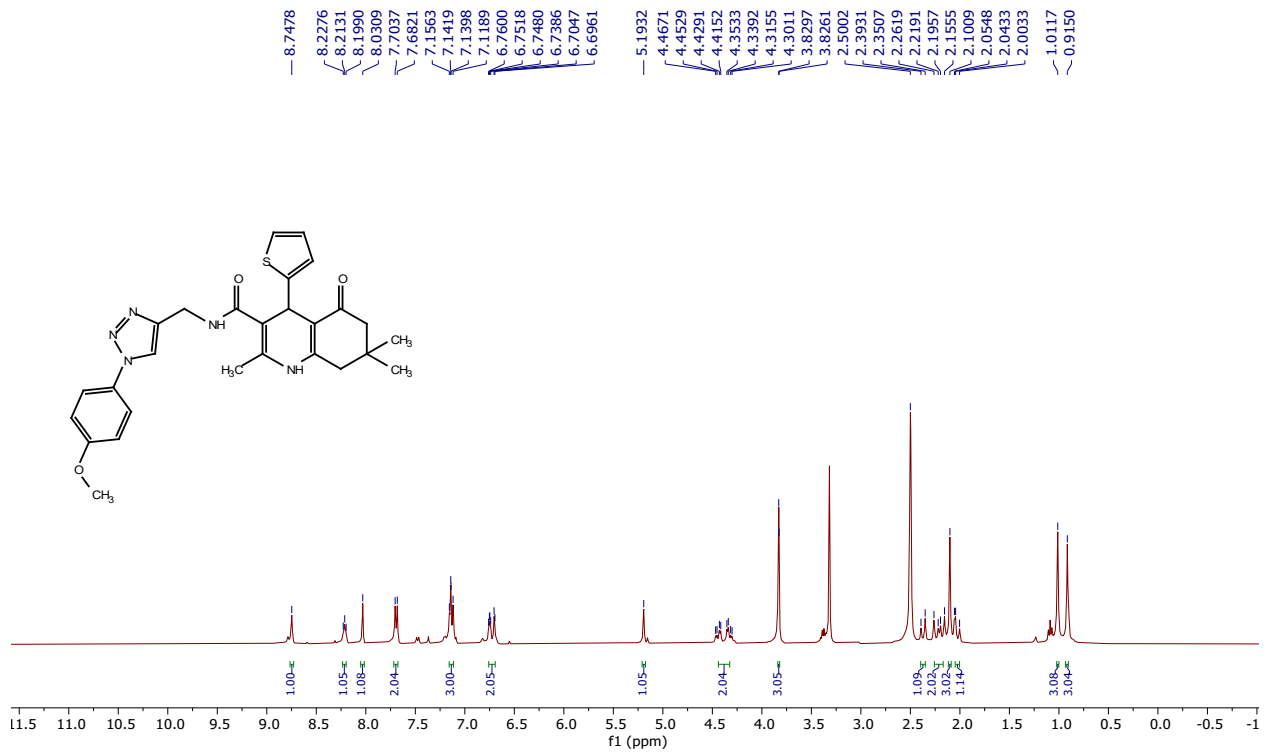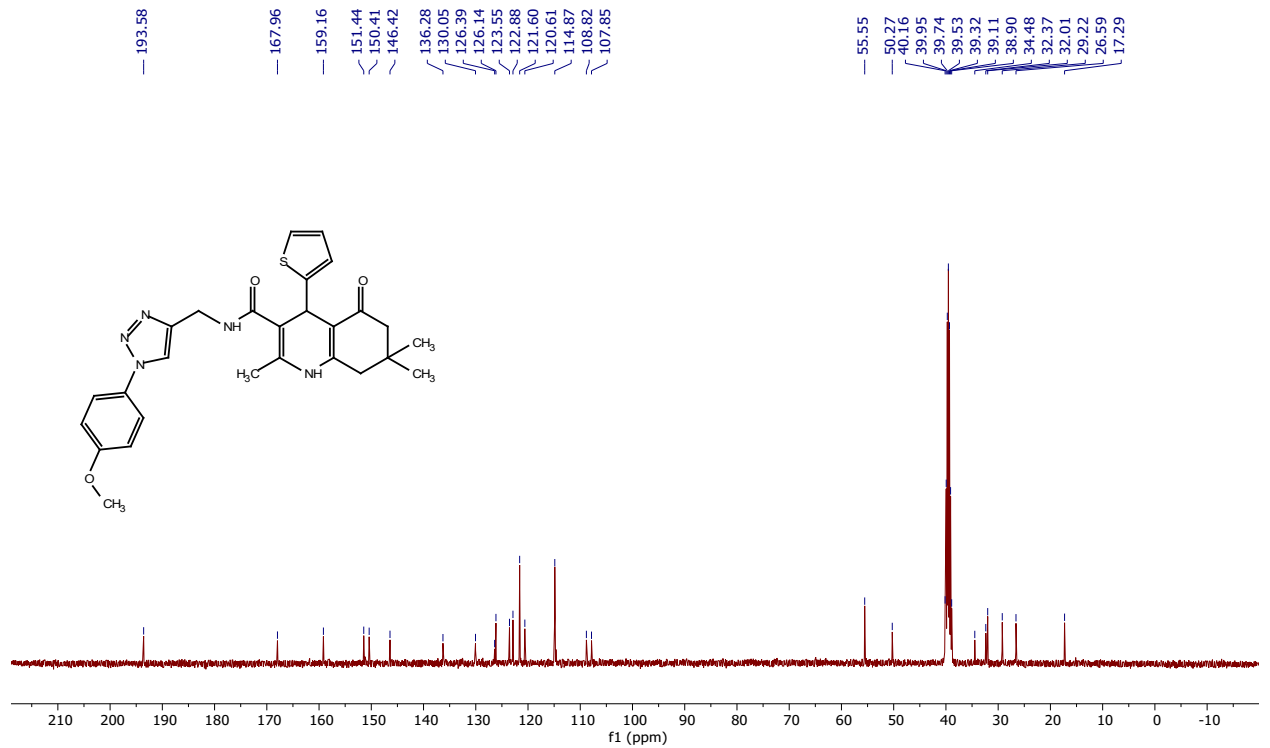

NMR spectrum of compound K3

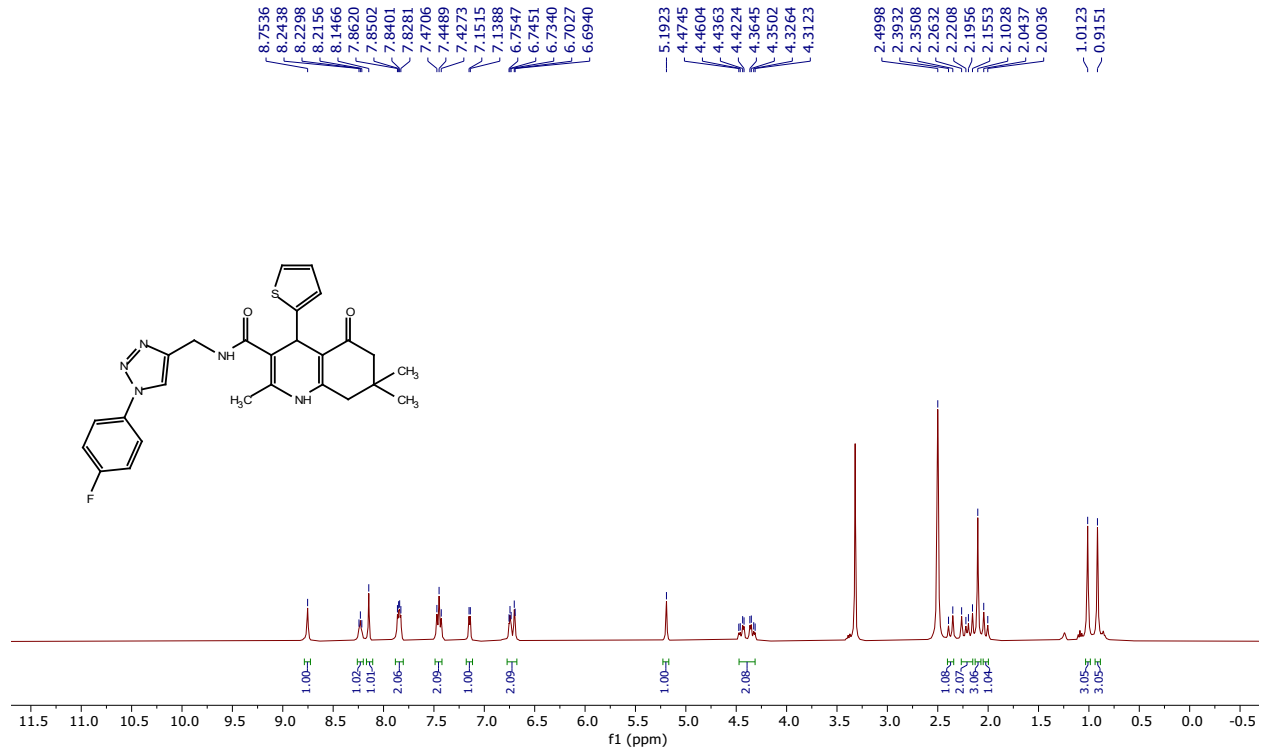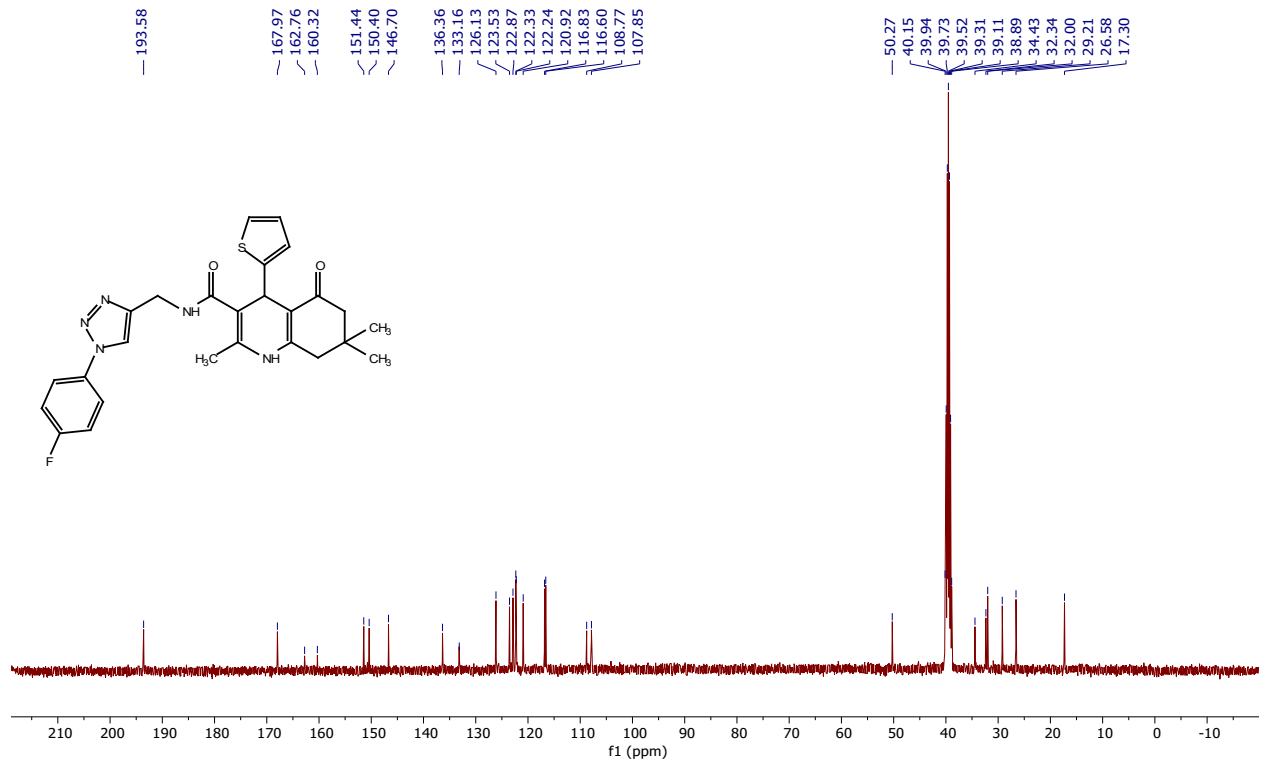

# NMR spectrum of compound K4

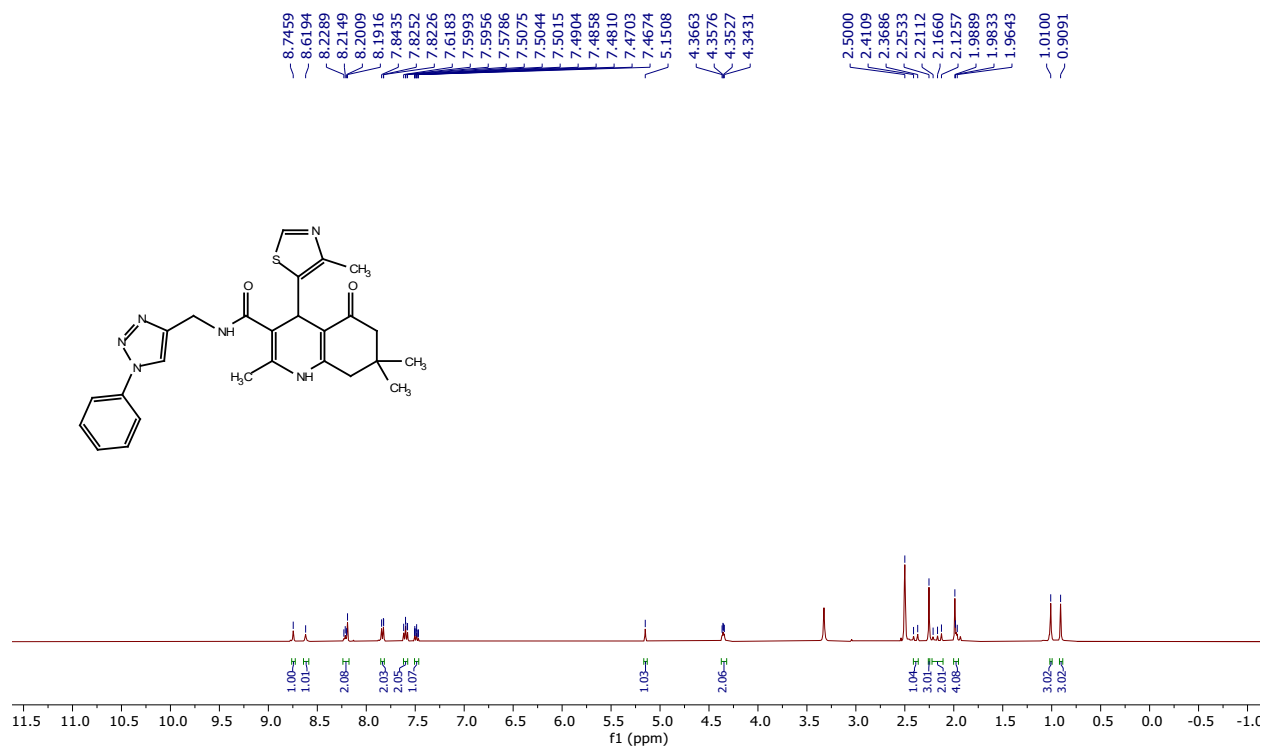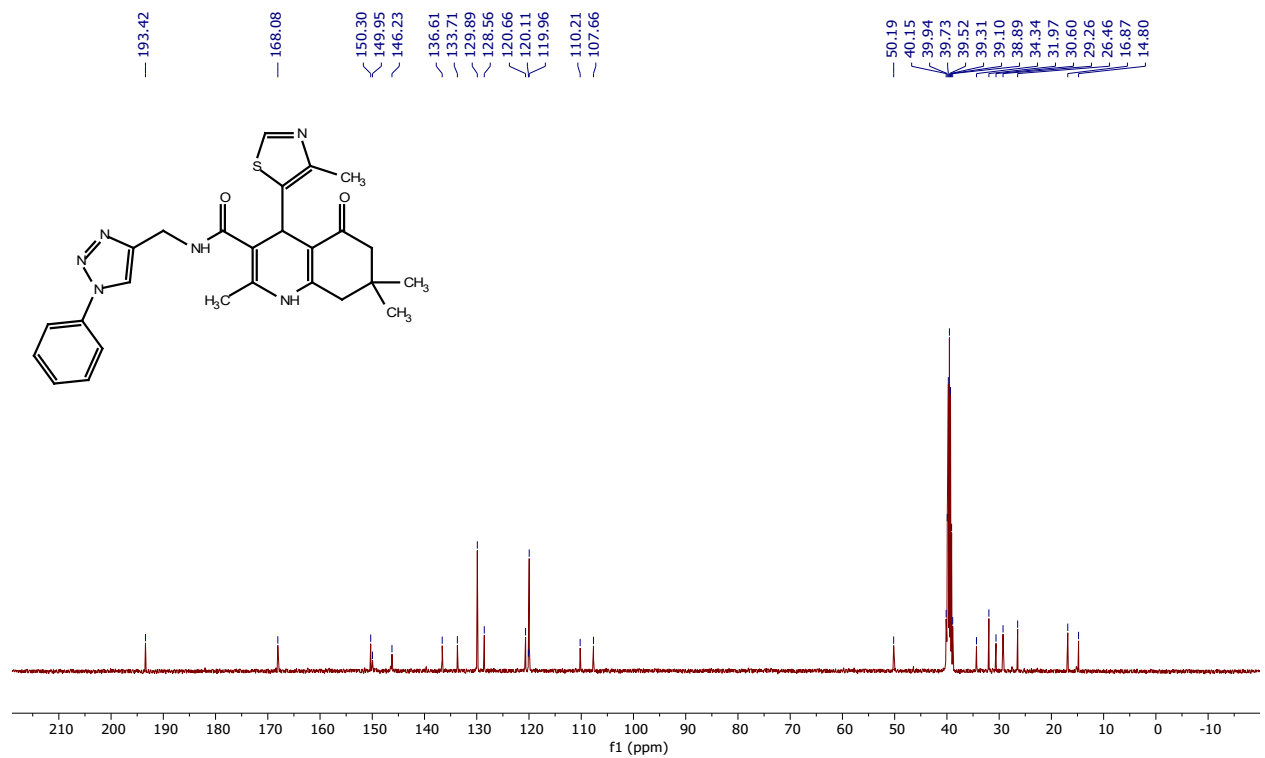

NMR spectrum of compound K5

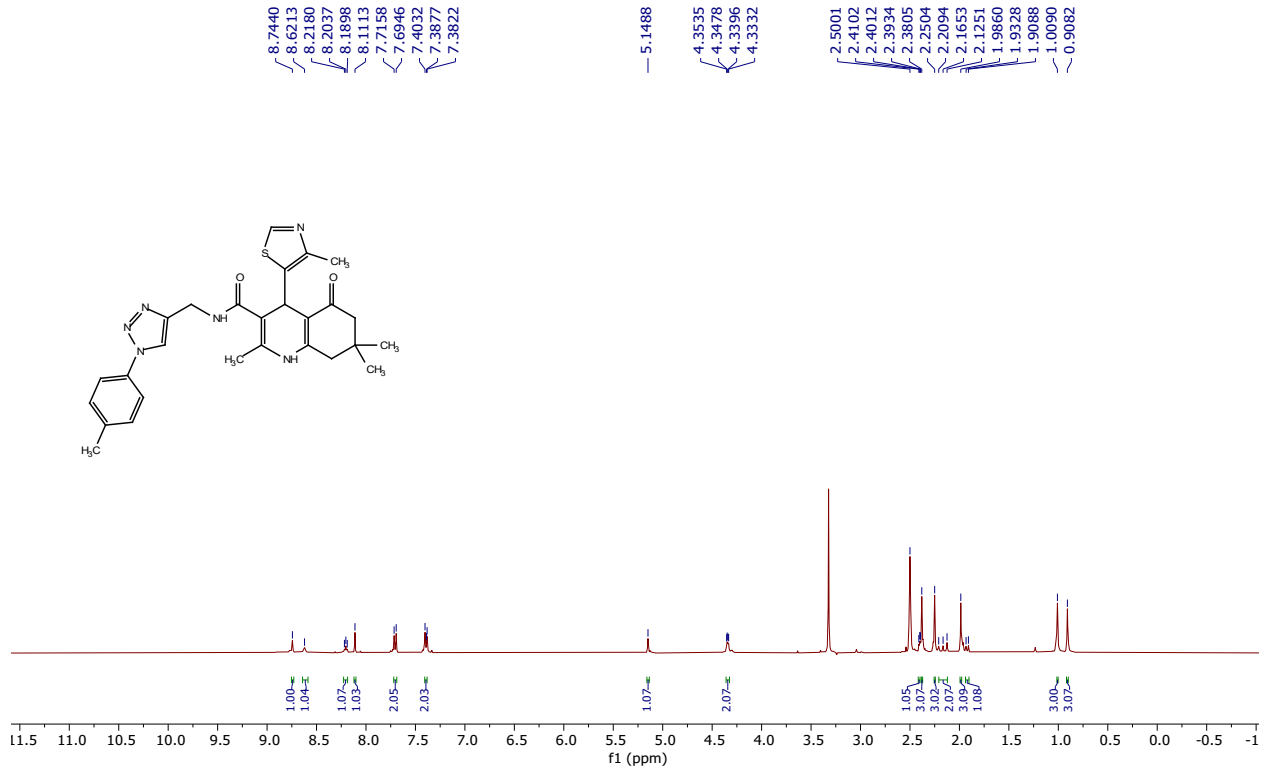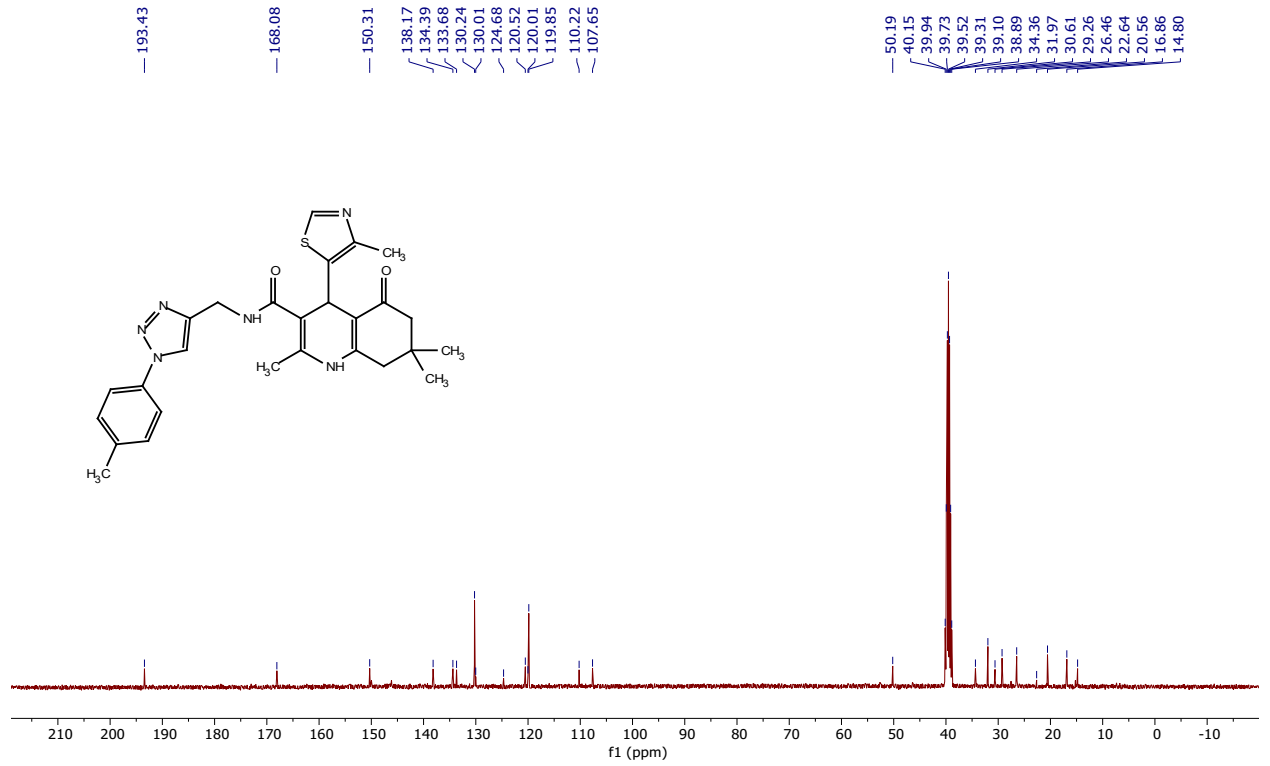

NMR spectrum of compound K6

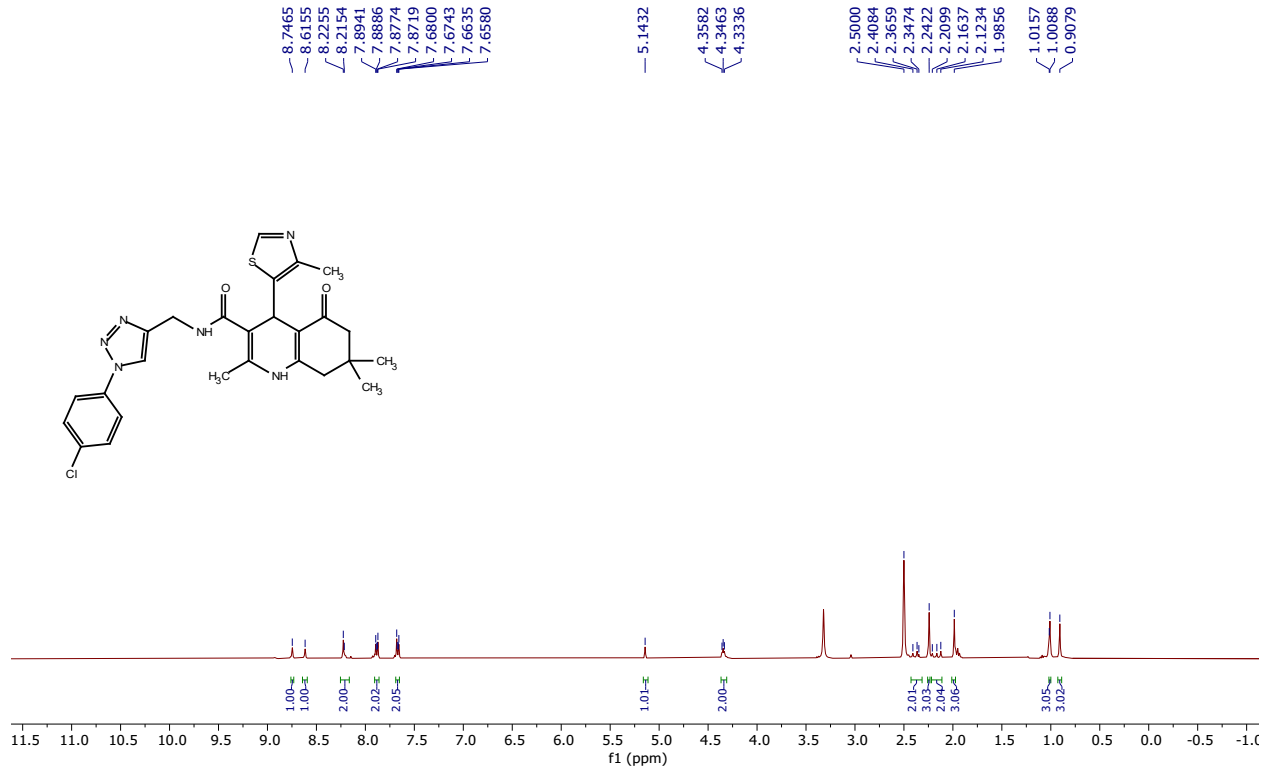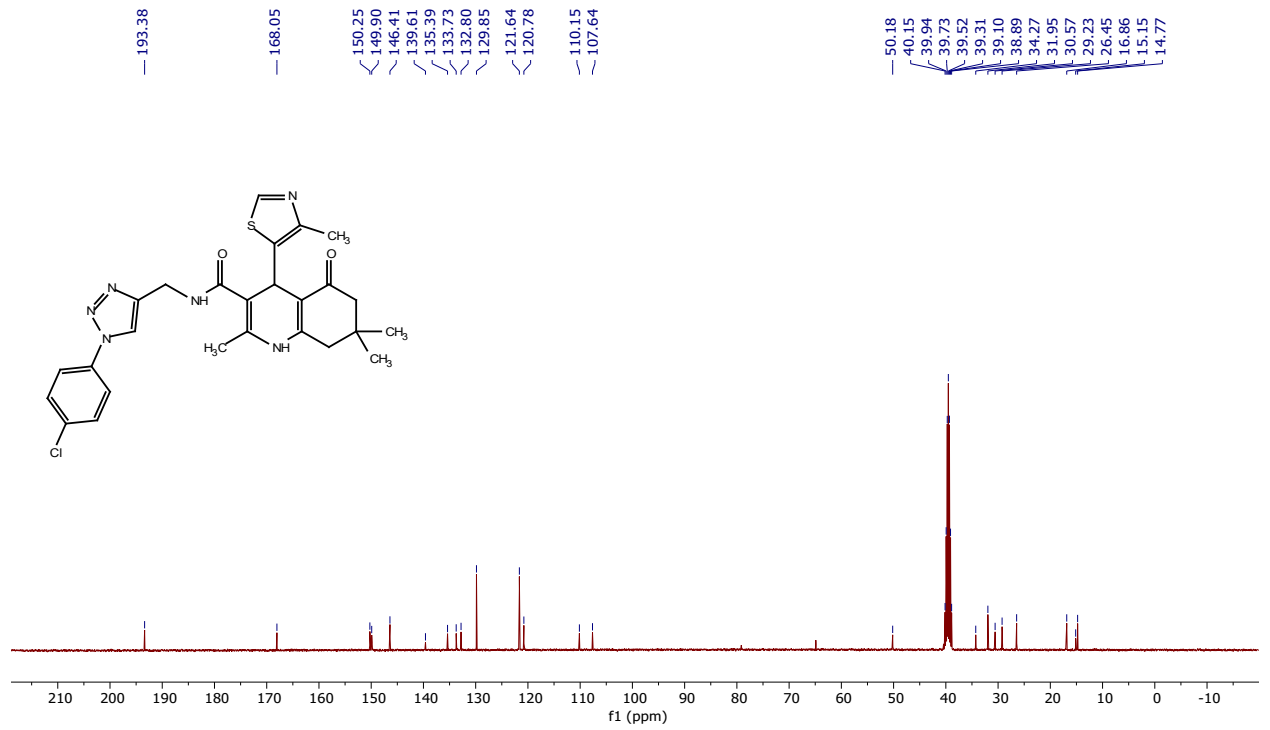

# NMR spectrum of compound K7

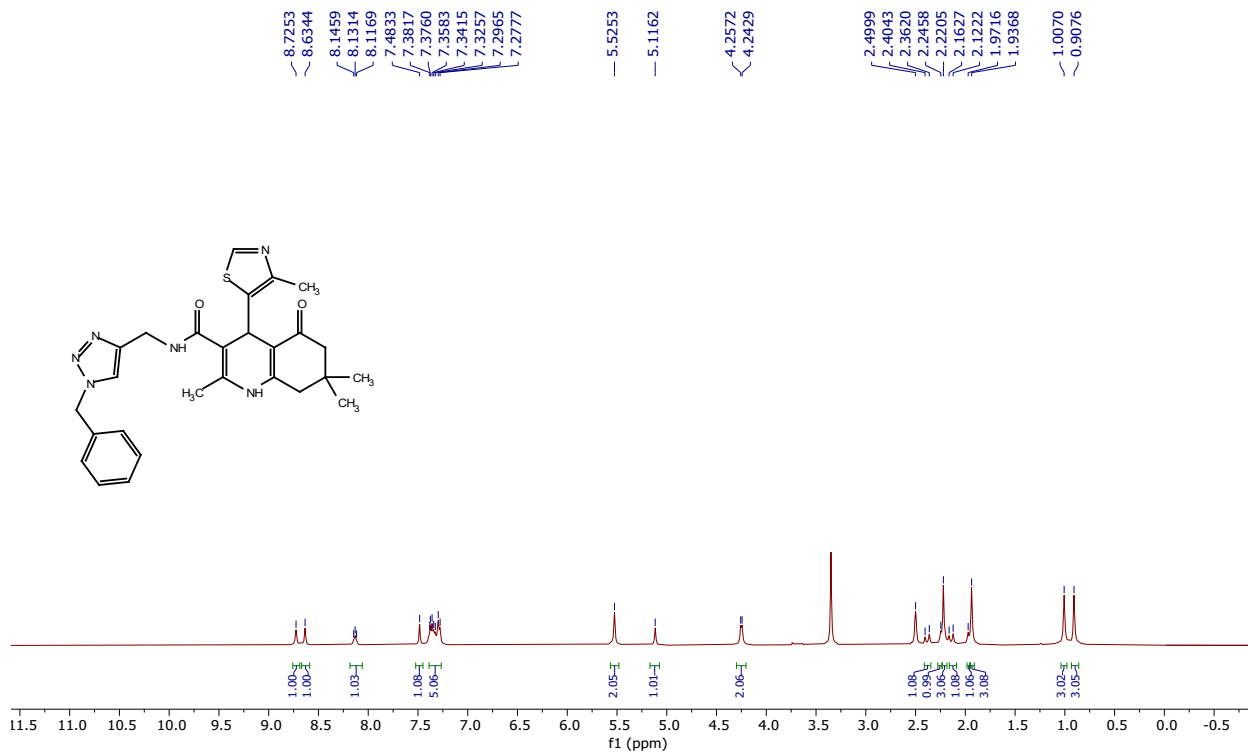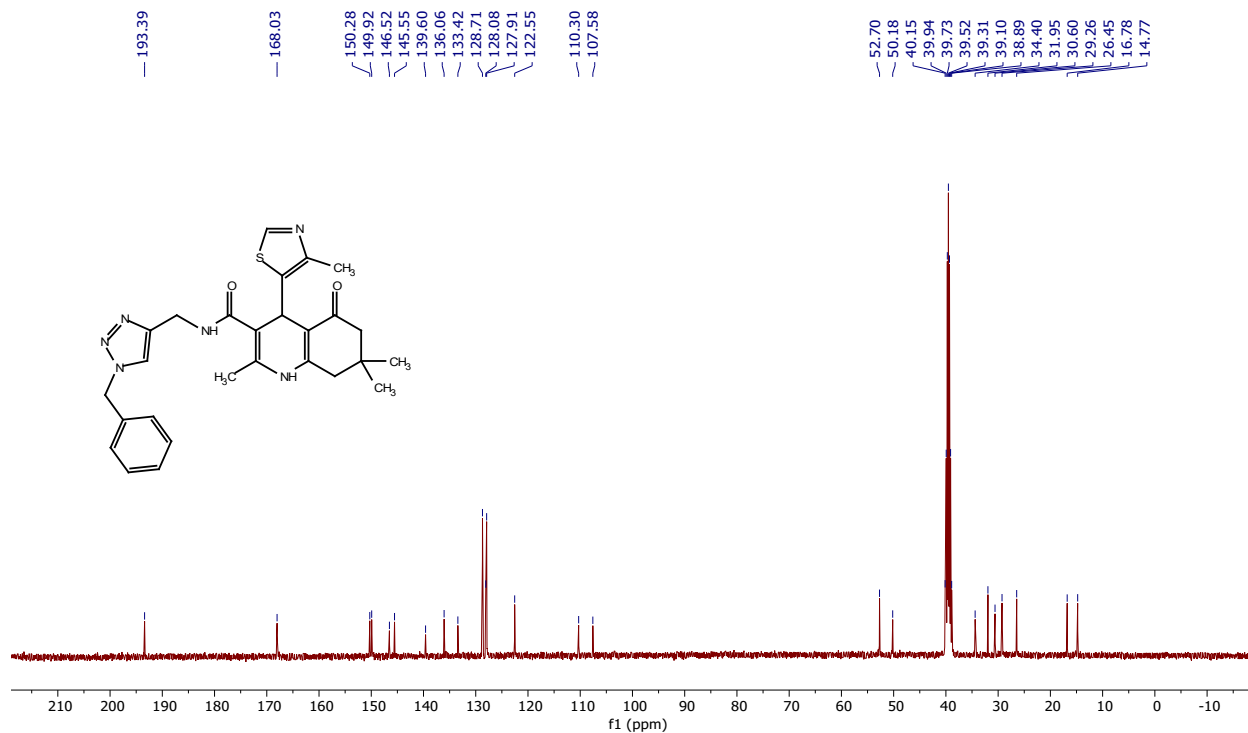

# HRMS Spectra of compound J1

|               |                  |             |             |                 |              |                        |                      |
|---------------|------------------|-------------|-------------|-----------------|--------------|------------------------|----------------------|
| Sample Name   | KVAJ-DHP-23      | Position    | Vial 5      | Instrument Name | Instrument 1 | User Name              |                      |
| Inj Vol       | 1                | InjPosition |             | SampleType      | Sample       | IRM Calibration Status | Some Ions Missed     |
| Data Filename | HRMS22102SEP05.d | ACQ Method  | ISOCRATIC.m | Comment         |              | Acquired Time          | 9/2/2022 11:28:15 AM |

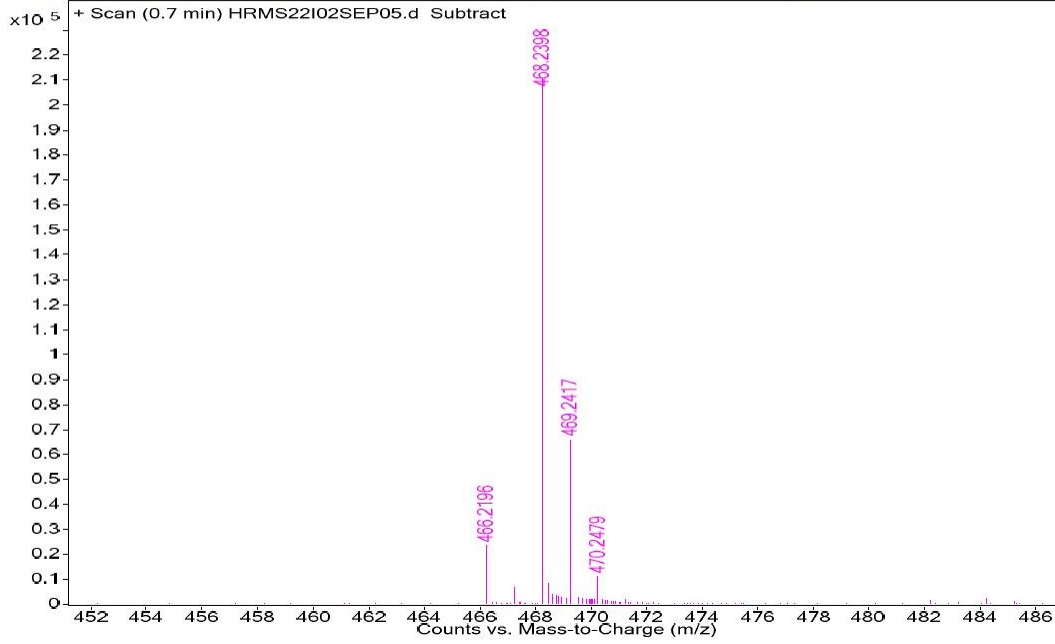

# HRMS Spectra of compound J2

|               |                  |             |             |                 |              |                        |                       |
|---------------|------------------|-------------|-------------|-----------------|--------------|------------------------|-----------------------|
| Sample Name   | KVA-DHP-21       | Position    | Vial 12     | Instrument Name | Instrument 1 | User Name              |                       |
| Inj Vol       | 1                | InjPosition |             | SampleType      | Sample       | IRM Calibration Status | Some Ions Missed      |
| Data Filename | HRMS22125AUG12.d | ACQ Method  | ISOCRATIC.m | Comment         |              | Acquired Time          | 8/25/2022 11:54:58 AM |

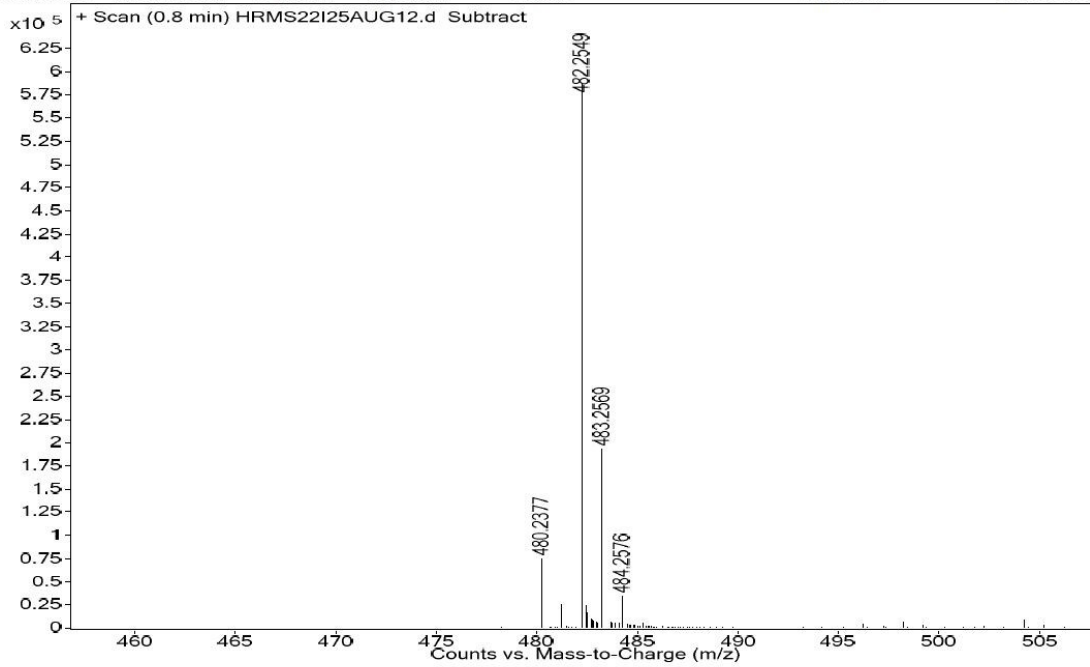



# HRMS Spectra of compound J3

D:\INTERNALS 2022\...HRMS22126SEP06

9/26/2022 11:10:40 AM

KVAJ-DHP-24

HRMS22126SEP06 #17 RT: 0.14 AV: 1 SB: 6 0.03-0.07 NL: 1.14E6  
T: FTMS + c ESI Full ms [100.00-750.00]

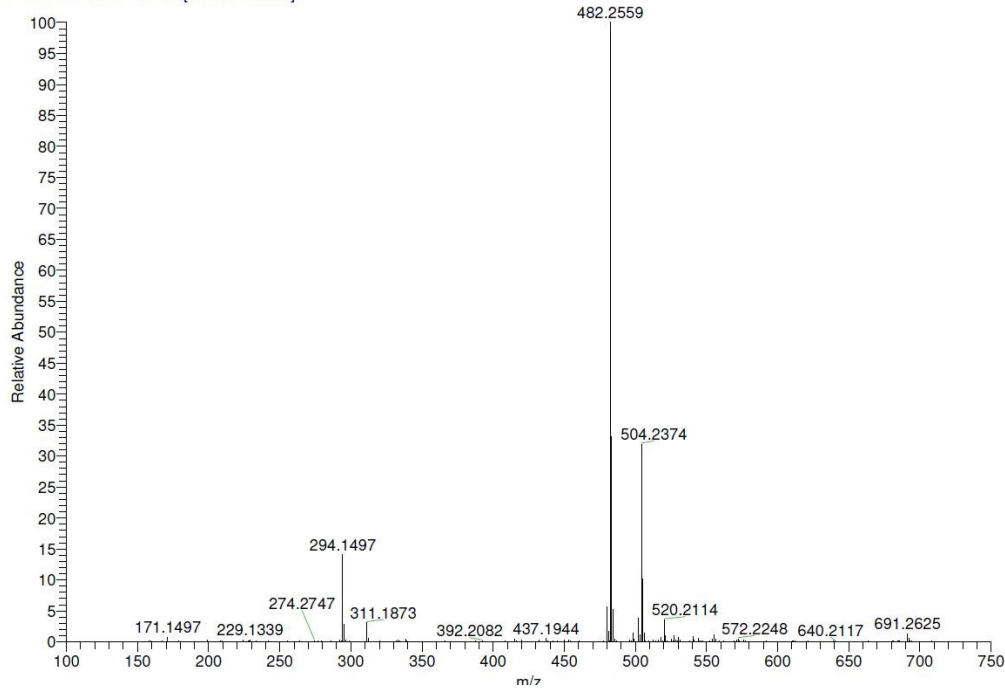

# HRMS Spectra of compound J4

| Sample Name   | KVAJ-DHP-22      | Position    | Vial 13     | Instrument Name | Instrument 1 | User Name              |                       |
|---------------|------------------|-------------|-------------|-----------------|--------------|------------------------|-----------------------|
| Inj Vol       | 1                | InjPosition |             | SampleType      | Sample       | IRM Calibration Status | Some Ions Missed      |
| Data Filename | HRMS22125AUG13.d | ACQ Method  | ISOCRATIC.m | Comment         |              | Acquired Time          | 8/25/2022 11:58:01 AM |

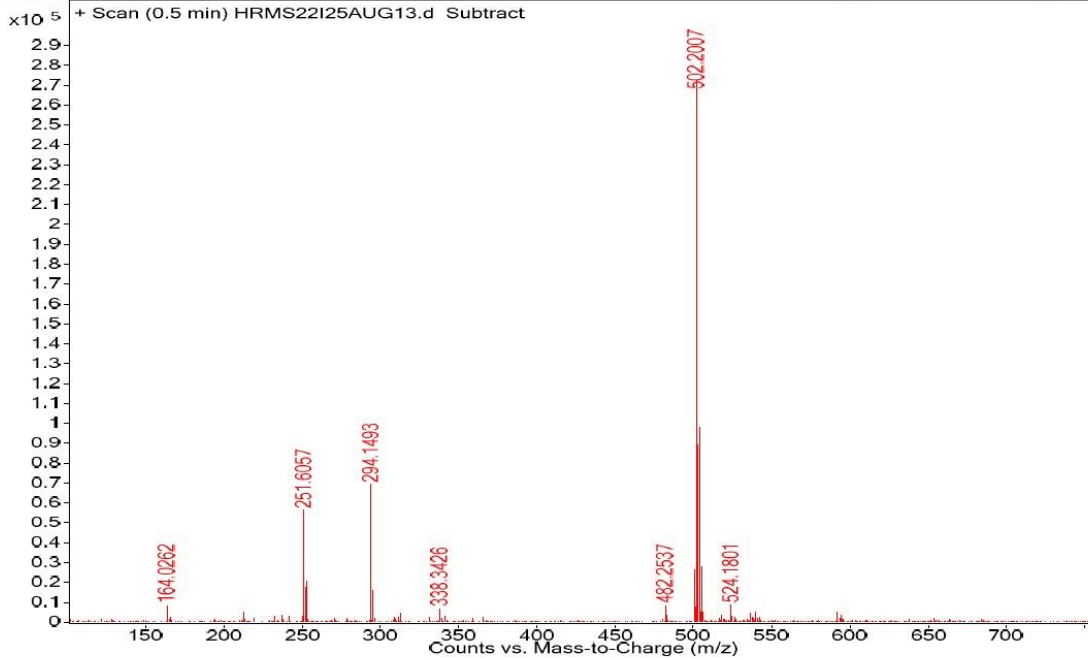

# HRMS Spectra of compound J5

D:\internals 2022\NOV22\HRMS22I23NOV08

11/23/2022 11:39:46 AM

HRMS22I23NOV08 #26 RT: 0.21 AV: 1 SB: 1 0.79 NL: 1.28E5  
T: FTMS + c ESI Full ms [100.00-750.00]

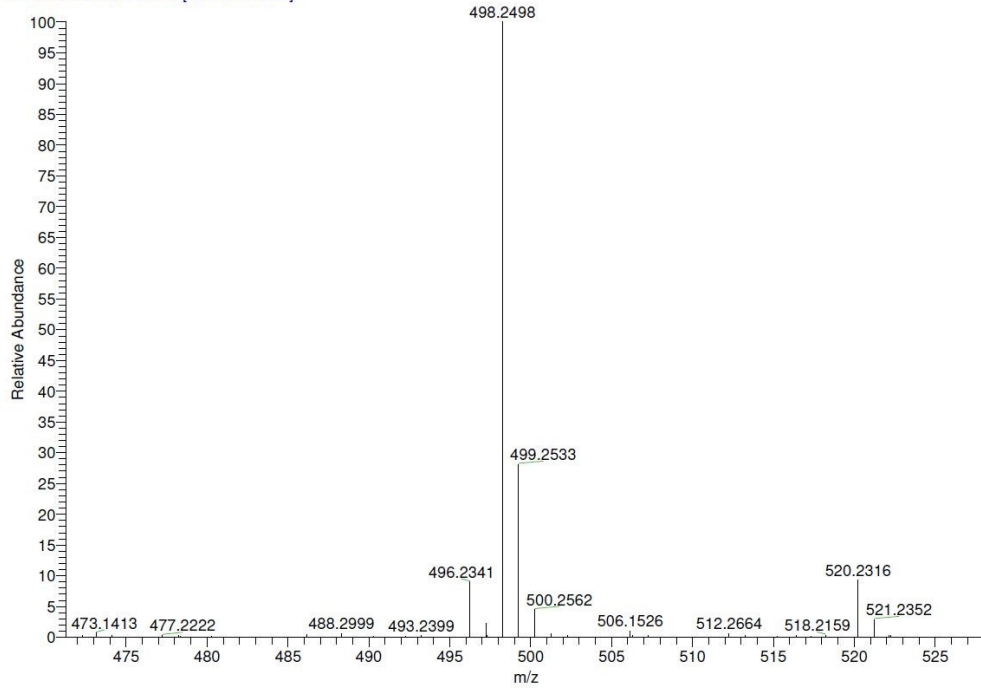

# HRMS Spectra of compound J6

D:\internals 2022\...HRMS22I20OCT06

10/20/2022 11:42:03 AM

HRMS22I20OCT06 #25 RT: 0.19 AV: 1 NL: 2.60E6  
T: FTMS + c ESI Full ms [100.00-750.00]

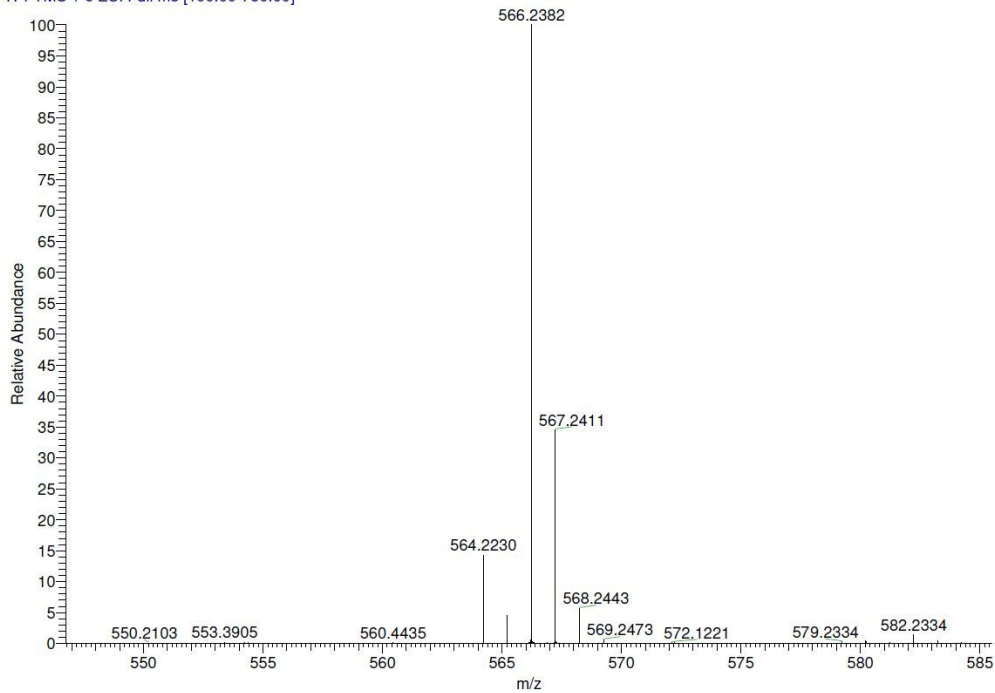

# HRMS Spectra of compound J7

D:\INTERNALS 2022\...HRMS22114SEP30

9/14/2022 11:57:18 AM

kvaj-bt-12

HRMS22114SEP30 #18 RT: 0.14 AV: 1 SB: 7 0.02-0.07 NL: 1.22E6  
T: FTMS + c ESI Full ms [100.00-750.00]

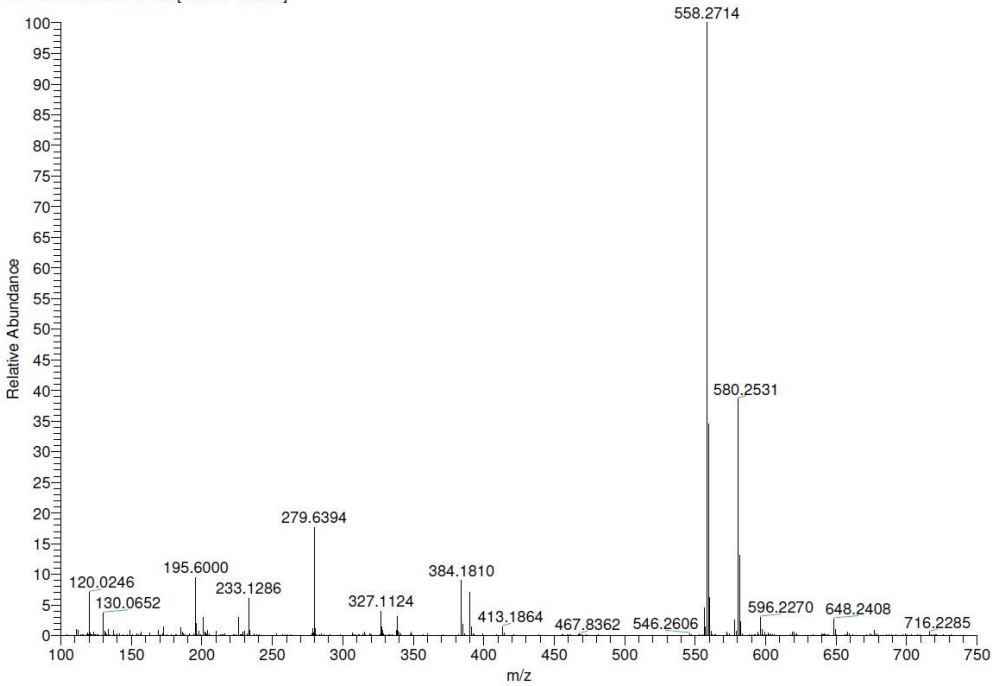

# HRMS Spectra of compound J8

| Sample Name   | kvaj-dhp6        | Position    | Vial 23     | Instrument Name | Instrument 1 | User Name              |                       |
|---------------|------------------|-------------|-------------|-----------------|--------------|------------------------|-----------------------|
| Inj Vol       | 1                | InjPosition |             | SampleType      | Sample       | IRM Calibration Status | Some Ions Missed      |
| Data Filename | HRMS22119MAY23.d | ACQ Method  | ISOCRATIC.m | Comment         |              | Acquired Time          | 5/19/2022 12:56:56 PM |

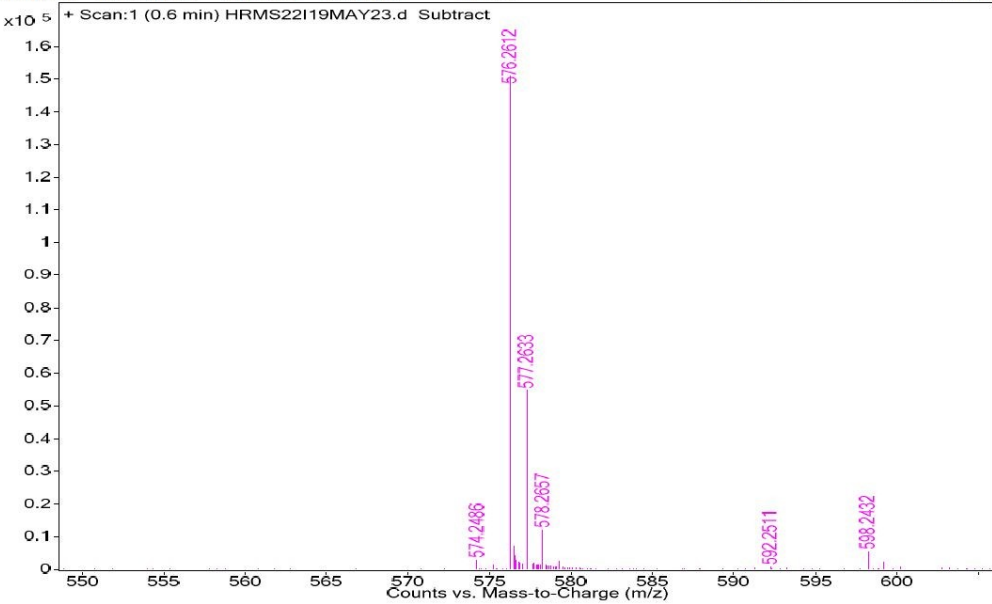

# HRMS Spectra of compound J9

D:\internals 2022\NOV22\HRMS22\02NOV19

11/2/2022 11:48:25 AM

HRMS22\02NOV19 #23 RT: 0.19 AV: 1 NL: 1.97E6  
T: FTMS + c ESI Full ms [100.00-750.00]

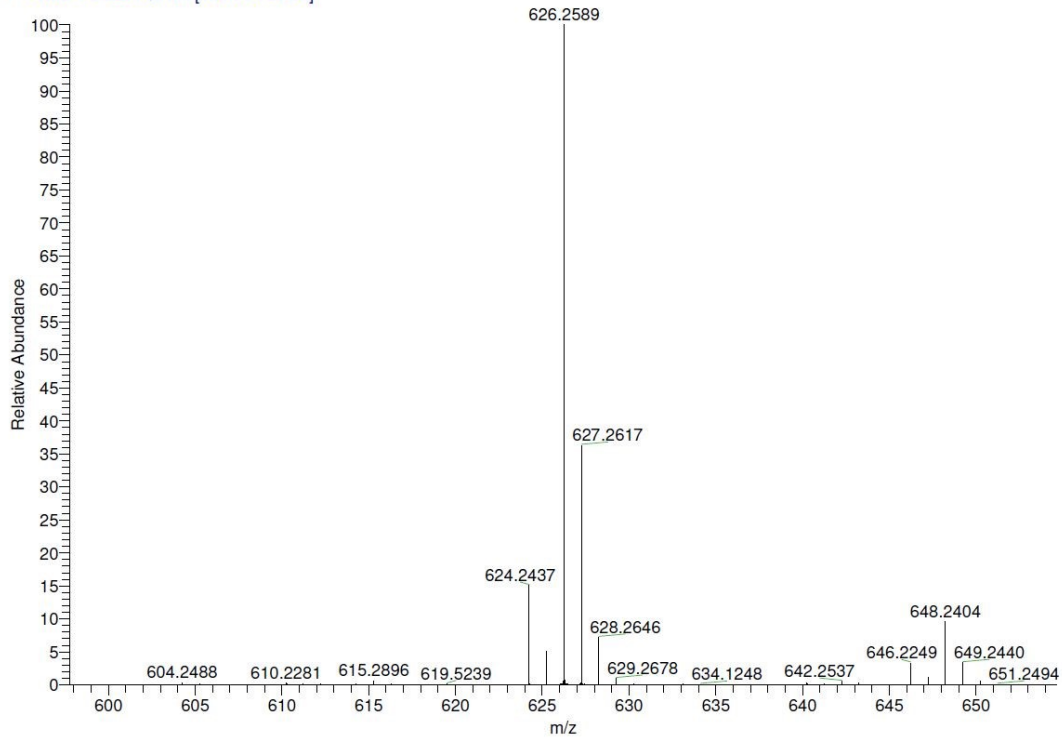

# HRMS Spectra of compound J10

D:\internals 2022\...HRMS22\12OCT05

10/12/2022 11:08:44 AM

HRMS22\12OCT05 #16-33 RT: 0.12-0.25 AV: 18 NL: 3.30E6  
T: FTMS + c ESI Full ms [100.00-750.00]

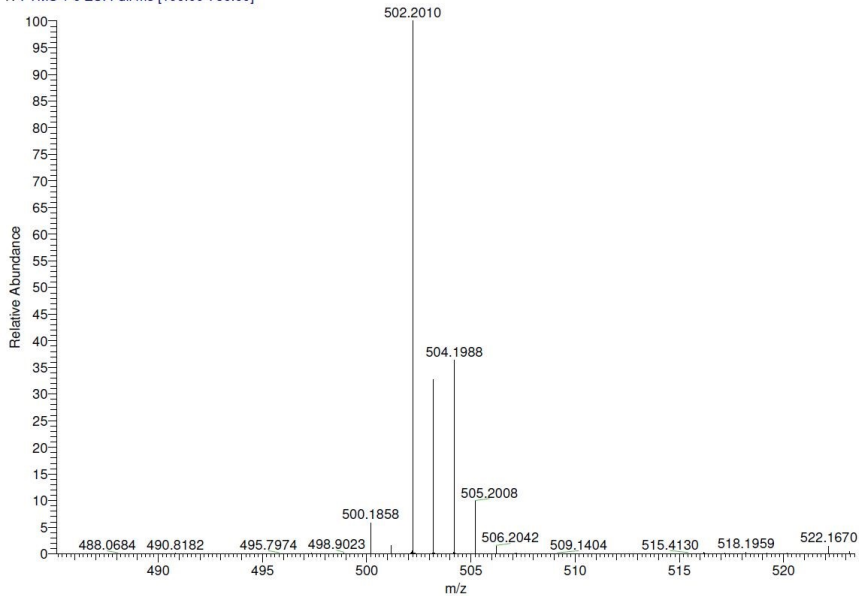

## HRMS Spectra of compound J11

D:\internals 2022\...HRMS22120OCT07

10/20/2022 11:44:00 AM

HRMS22120OCT07 #25 RT: 0.19 AV: 1 NL: 1.98E6  
T: FTMS + c ESI Full ms [100.00-750.00]

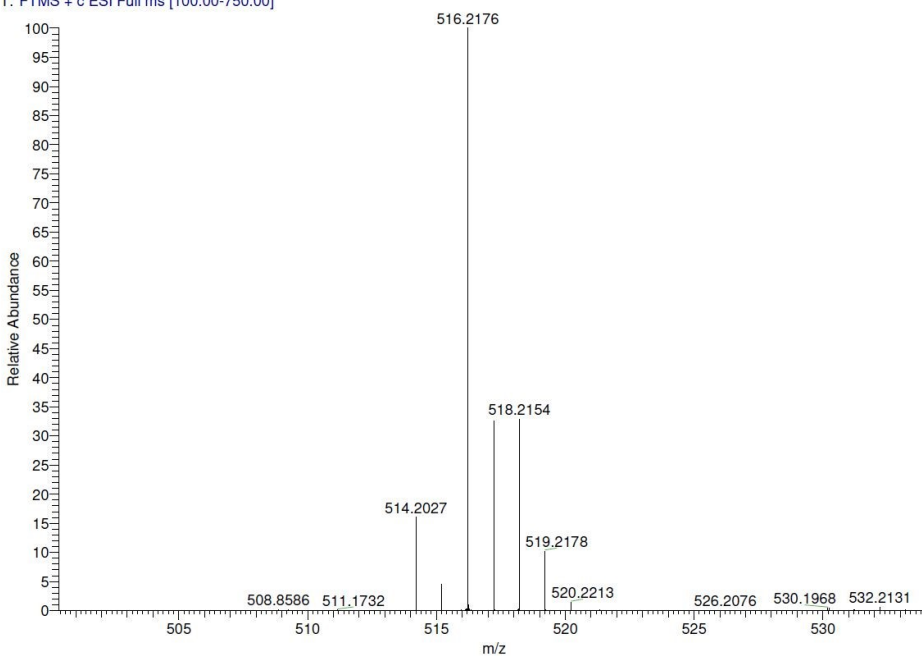

## HRMS Spectra of compound J12

D:\INTERNAL 2023\MAR 2023\HRMS23114MAR48

3/14/2023 12:16:21 PM

HRMS23114MAR48 #16 RT: 0.13 AV: 1 SB: 1 0.96 NL: 2.42E5  
T: FTMS + c ESI Full ms [100.00-750.00]

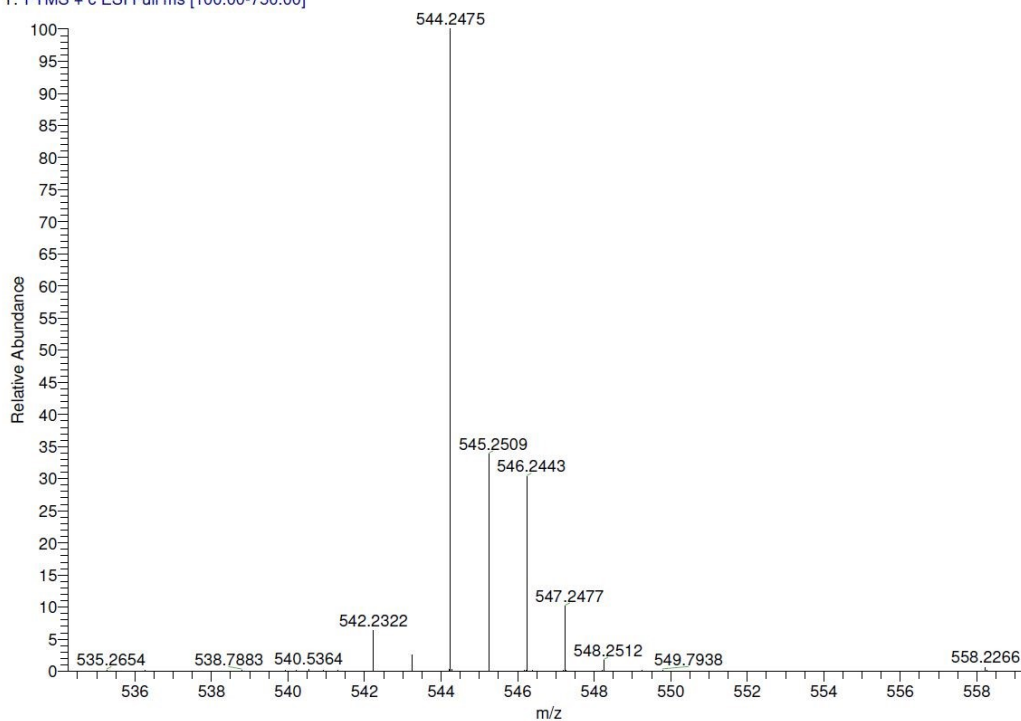

# HRMS Spectra of compound J13

D:\INTERNALS 2022\...HRMS22114SEP31

9/14/2022 11:59:15 AM

KVAJ-DHP25

HRMS22114SEP31 #31 RT: 0.24 AV: 1 SB: 7 0.03-0.07 NL: 1.56E6  
T: FTMS + c ESI Full ms [100.00-750.00]

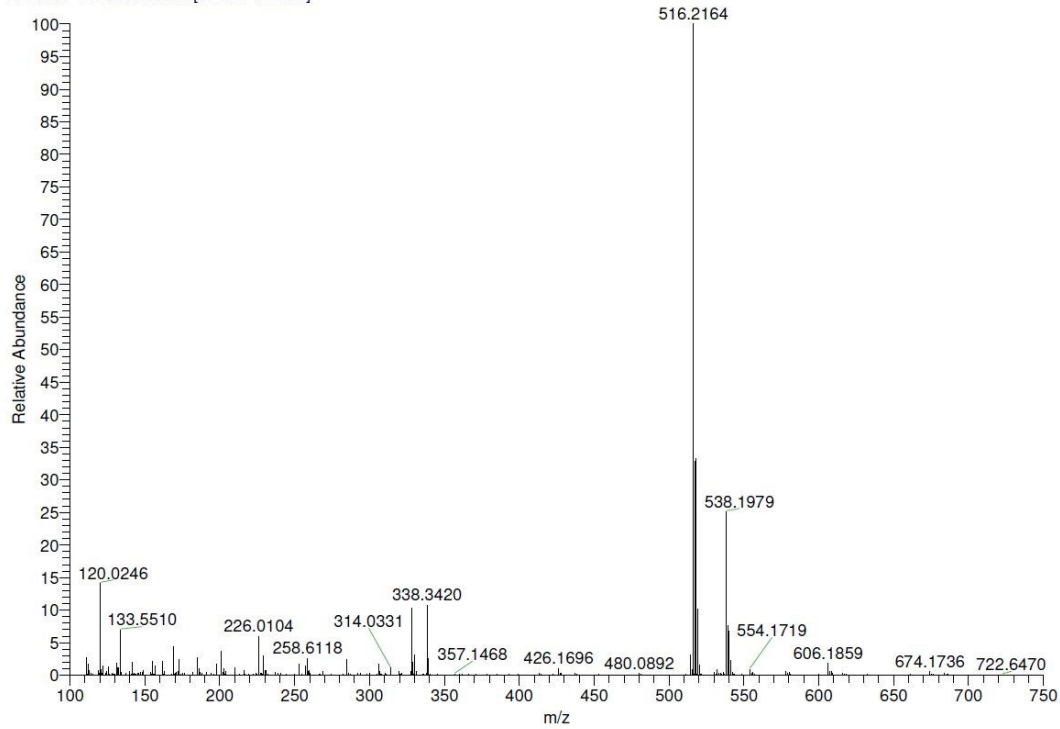

# HRMS Spectra of compound J14

| Sample Name      | Position    | Vial    | Instrument Name      | Instrument 1 | User Name              |
|------------------|-------------|---------|----------------------|--------------|------------------------|
| kvaj-dhp16       | Vial 6      | 6       | Instrument 1         | Sample       |                        |
| Inj Vol          | InjPosition |         | SampleType           |              | IRM Calibration Status |
| 1                |             |         |                      |              | Some Ions Missed       |
| Data Filename    | ACQ Method  | Comment | Acquired Time        |              |                        |
| HRMS22102SEP06.d | ISOCRATIC.m |         | 9/2/2022 11:31:24 AM |              |                        |

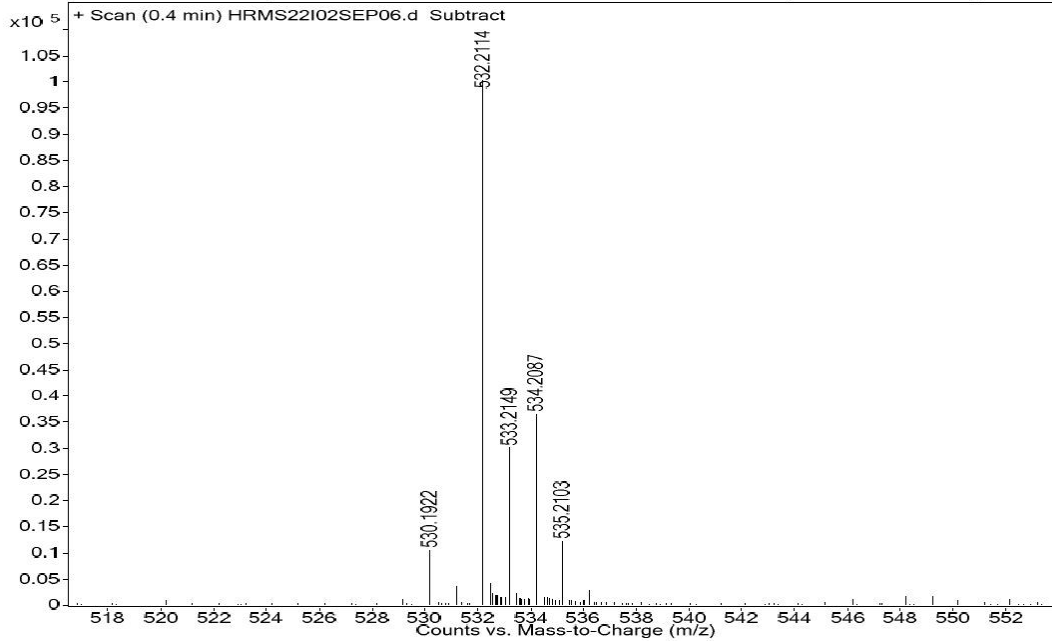

## HRMS Spectra of compound J15

D:\INTERNAL 2023\MAR 2023\HRMS23114MAR47

3/14/2023 12:14:24 PM

HRMS23114MAR47 #29 RT: 0.23 AV: 1 SB: 1 0.97 NL: 1.61E6  
T: FTMS + c ESI Full ms [100.00-750.00]

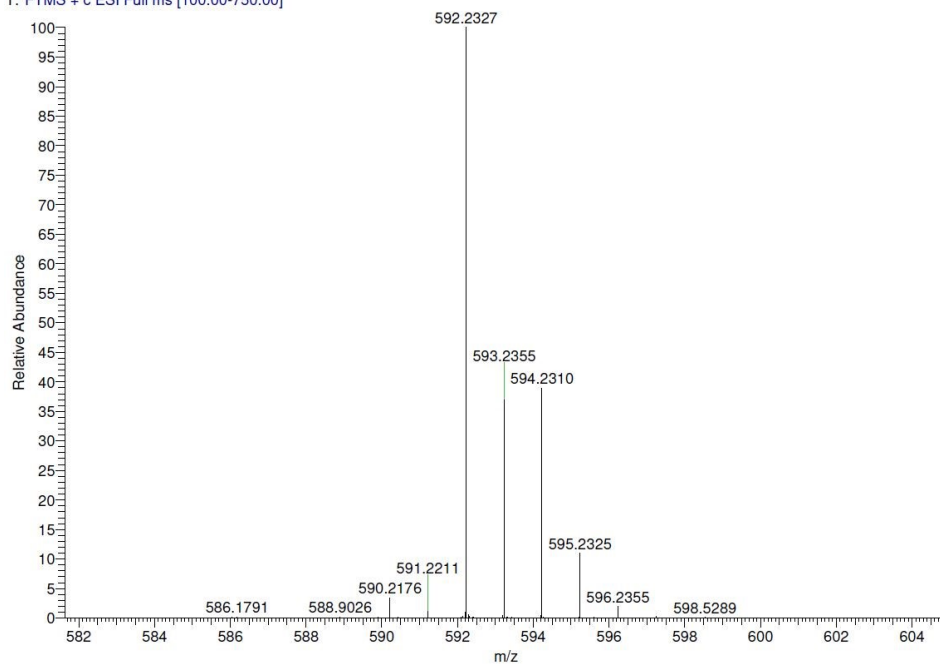

## HRMS Spectra of compound J16

D:\internals 2022...\HRMS22112OCT04

10/12/2022 11:06:48 AM

HRMS22112OCT04 #16-33 RT: 0.12-0.25 AV: 18 NL: 1.86E6  
T: FTMS + c ESI Full ms [100.00-750.00]

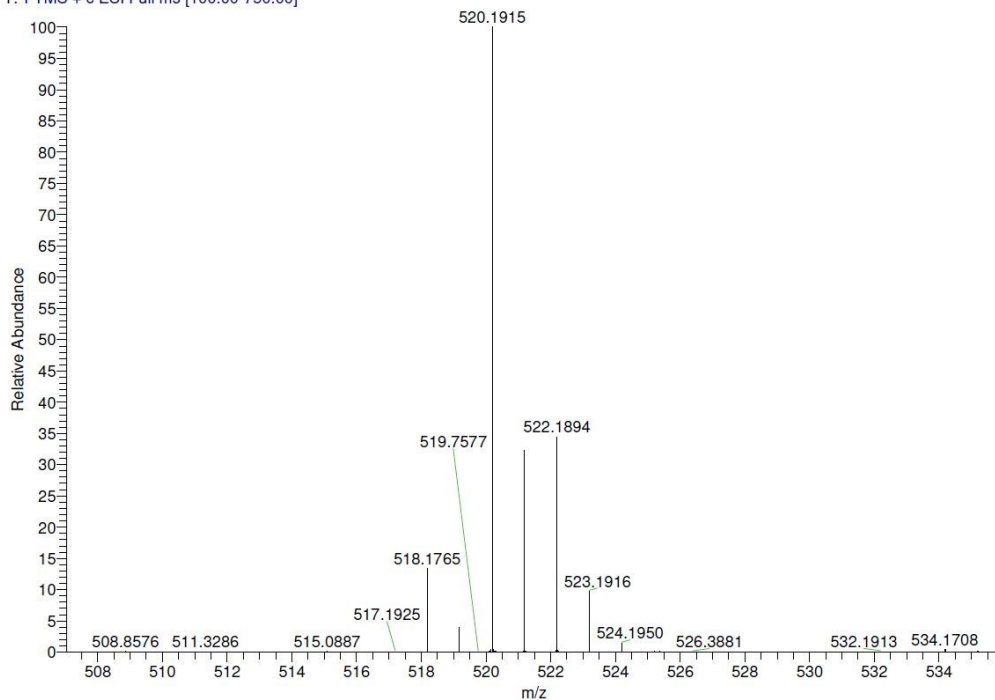

## HRMS Spectra of compound J17

D:\INTERNAL 2023\MAR 2023\HRMS23114MAR46

3/14/2023 12:12:28 PM

HRMS23114MAR46 #22 RT: 0.17 AV: 1 SB: 1 0.96 NL: 4.75E6

T: FTMS + c ESI Full ms [100.00-750.00]

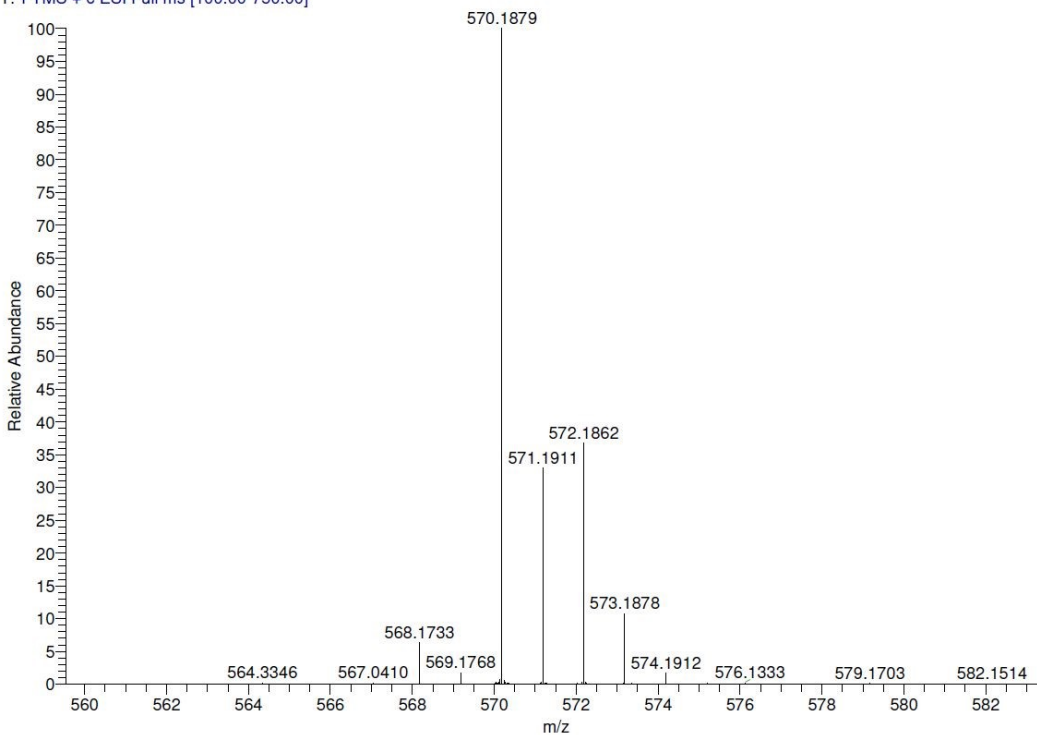

## HRMS Spectra of compound J18

D:\INTERNAL 2023\MAR 2023\HRMS23114MAR19

3/14/2023 11:20:04 AM

HRMS23114MAR19 #25 RT: 0.20 AV: 1 SB: 1 0.94 NL: 1.95E6

T: FTMS + c ESI Full ms [100.00-750.00]

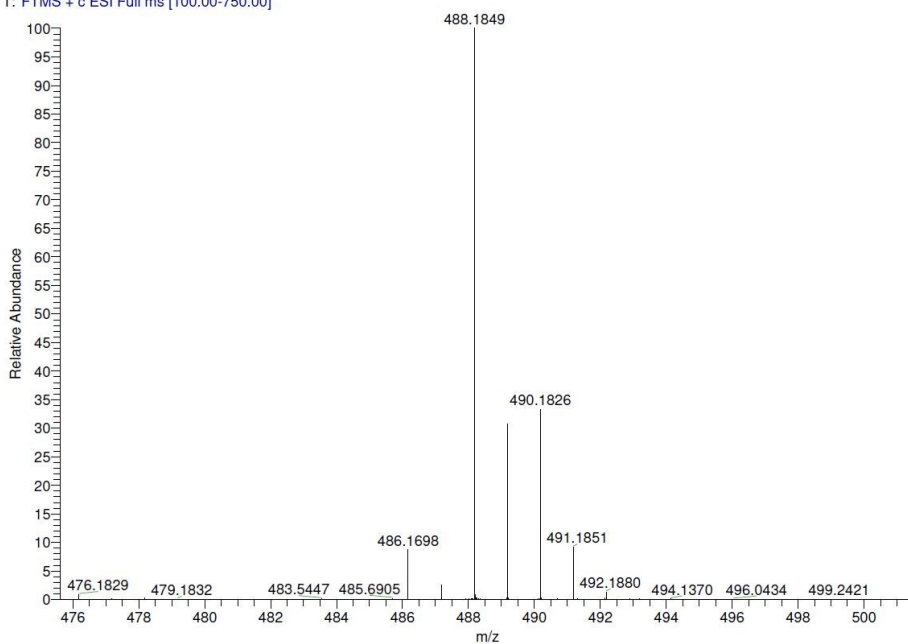



## HRMS Spectra of compound J19

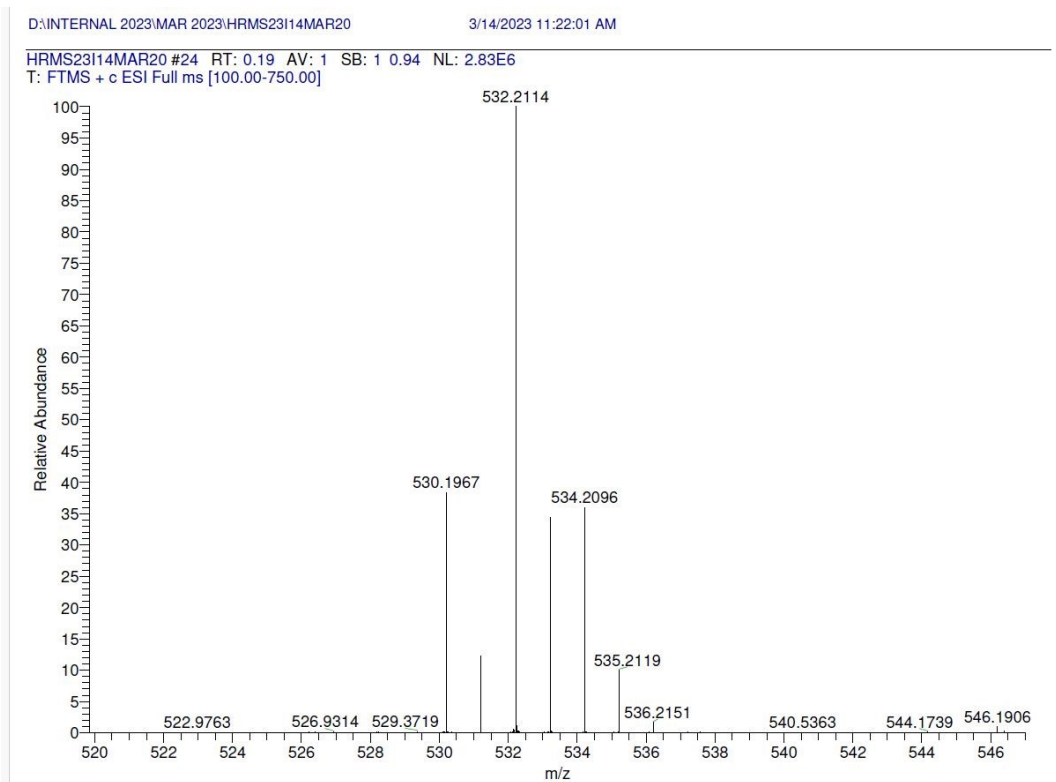

## HRMS Spectra of compound J20

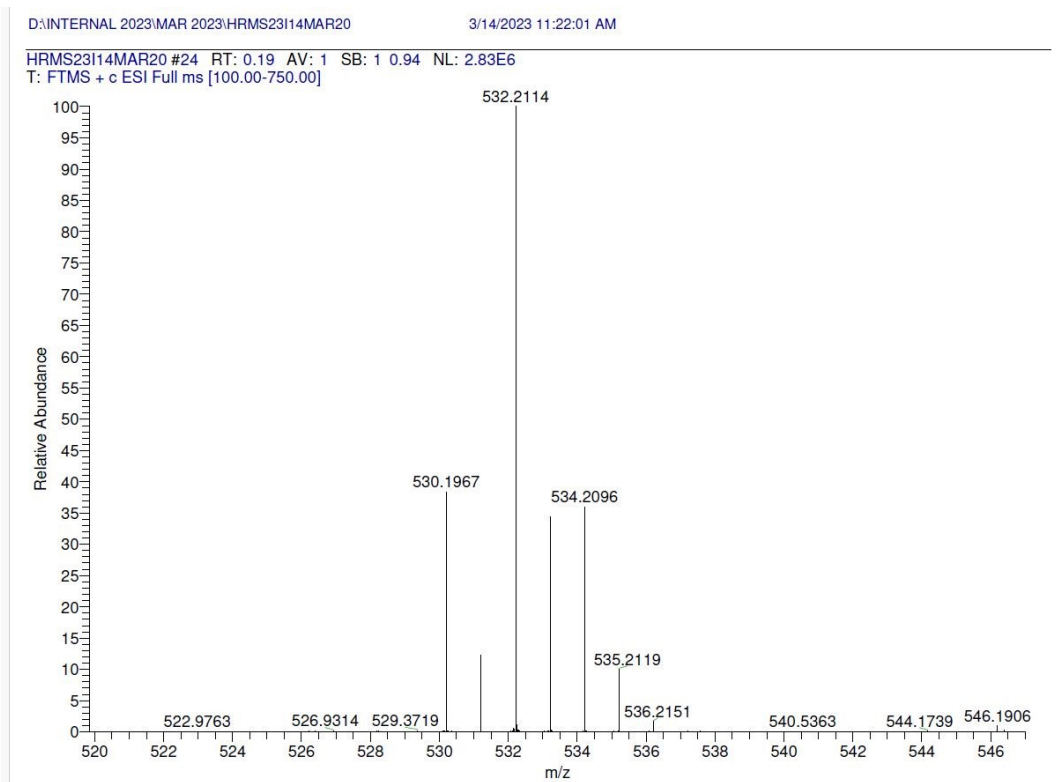

# HRMS Spectra of compound J21

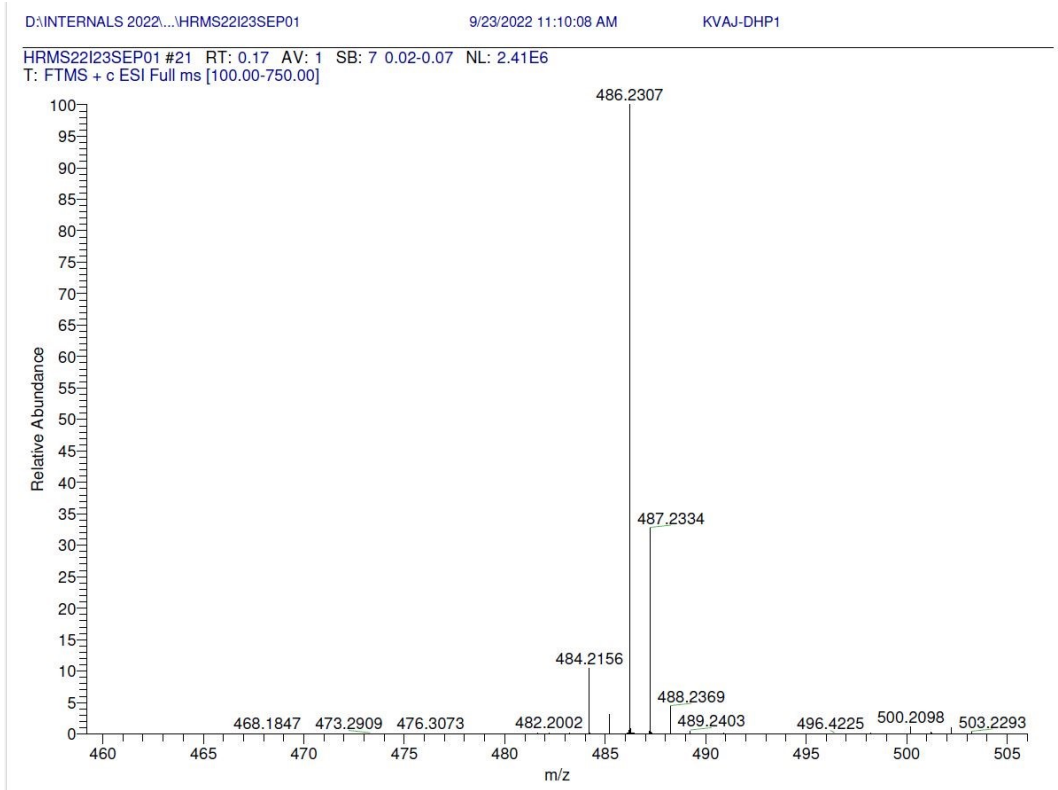

# HRMS Spectra of compound J22

## SAIF [HRMS Report]

|                   |                      |                       |                           |
|-------------------|----------------------|-----------------------|---------------------------|
| Data File:        | HRMS23I15MAR33       | Original Data Path:   | D:\INTERNAL 2023\MAR 2023 |
| Sample ID:        | kvaj-dhp-32          | Sample Name:          |                           |
| Acquisition Date: | 03/15/23 11:41:03 AM | Run Time(min):        | 0.00                      |
| Vial:             | CStk1-01:33          | Injection Volume(ul): | 1.00                      |

HRMS23I15MAR33 #32-62 RT: 0.25-0.50 AV: 31 SB: 1 0.01 NL: 7.27E5  
T: FTMS + c ESI Full ms [100.00-750.00]

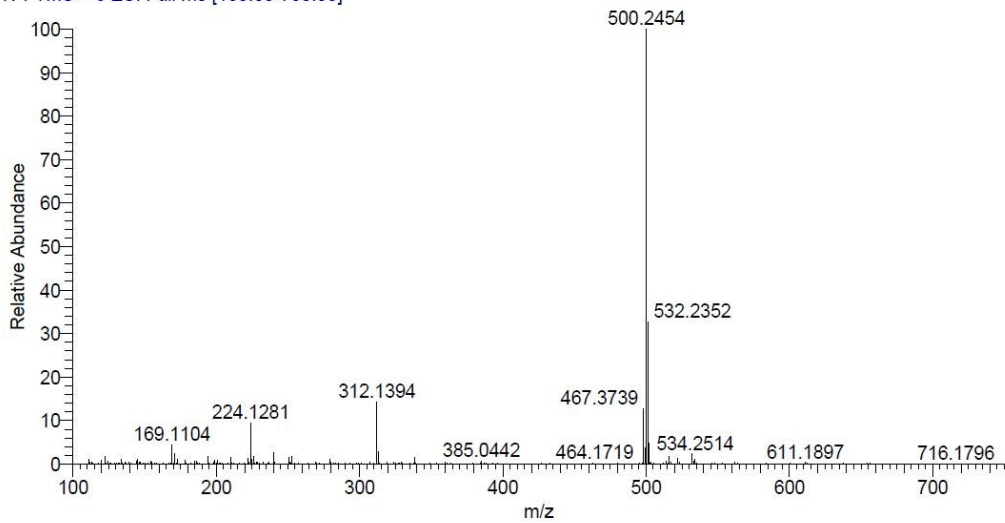

# HRMS Spectra of compound J23

|               |                  |             |             |                 |              |                        |                      |
|---------------|------------------|-------------|-------------|-----------------|--------------|------------------------|----------------------|
| Sample Name   | kvaj-dhp4        | Position    | Vial 26     | Instrument Name | Instrument 1 | User Name              |                      |
| Inj Vol       | 1                | InjPosition |             | SampleType      | Sample       | IRM Calibration Status | Some Ions Missed     |
| Data Filename | HRMS22I03AUG26.d | ACQ Method  | ISOCRATIC.m | Comment         |              | Acquired Time          | 8/3/2022 12:48:41 PM |

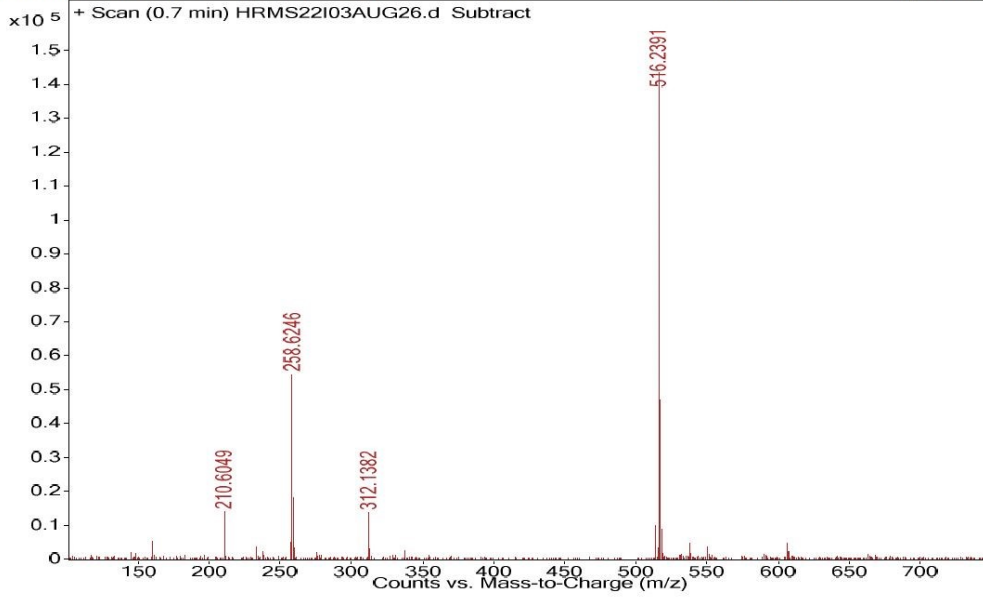

# HRMS Spectra of compound J24

## SAIF [HRMS Report]

|                   |                      |                       |                           |
|-------------------|----------------------|-----------------------|---------------------------|
| Data File:        | HRMS23I15MAR34       | Original Data Path:   | D:\INTERNAL 2023\MAR 2023 |
| Sample ID:        | kvaj-dhp-34          | Sample Name:          |                           |
| Acquisition Date: | 03/15/23 11:42:59 AM | Run Time(min):        | 0.00                      |
| Vial:             | CStk1-01:34          | Injection Volume(μl): | 1.00                      |

HRMS23I15MAR34 #33-64 RT: 0.25-0.50 AV: 32 SB: 1 0.01 NL: 2.23E6  
T: FTMS + c ESI Full ms [100.00-750.00]

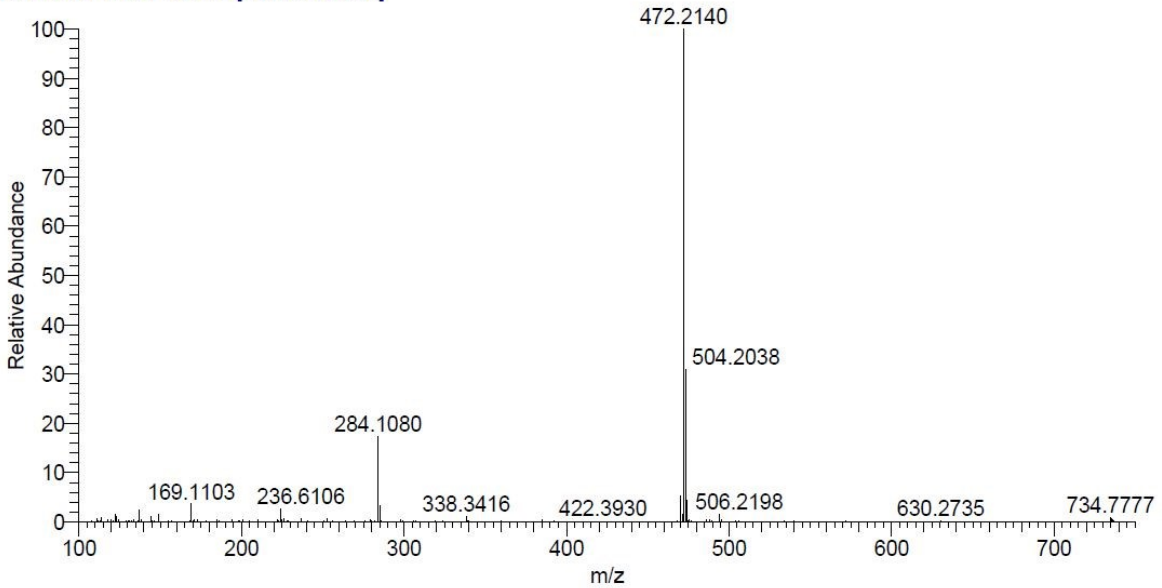

# HRMS Spectra of compound J25

## SAIF [HRMS Report]

|                   |                      |                       |                           |
|-------------------|----------------------|-----------------------|---------------------------|
| Data File:        | HRMS23I14MAR21       | Original Data Path:   | D:\INTERNAL 2023\MAR 2023 |
| Sample ID:        | KVAJ-DHP-30          | Sample Name:          |                           |
| Acquisition Date: | 03/14/23 11:23:58 AM | Run Time(min):        | 0.00                      |
| Vial:             | CStk1-01:21          | Injection Volume(μl): | 1.00                      |

HRMS23I14MAR21 #33-64 RT: 0.25-0.50 AV: 32 SB: 1 0.01 NL: 1.33E6  
T: FTMS + c ESI Full ms [100.00-750.00]

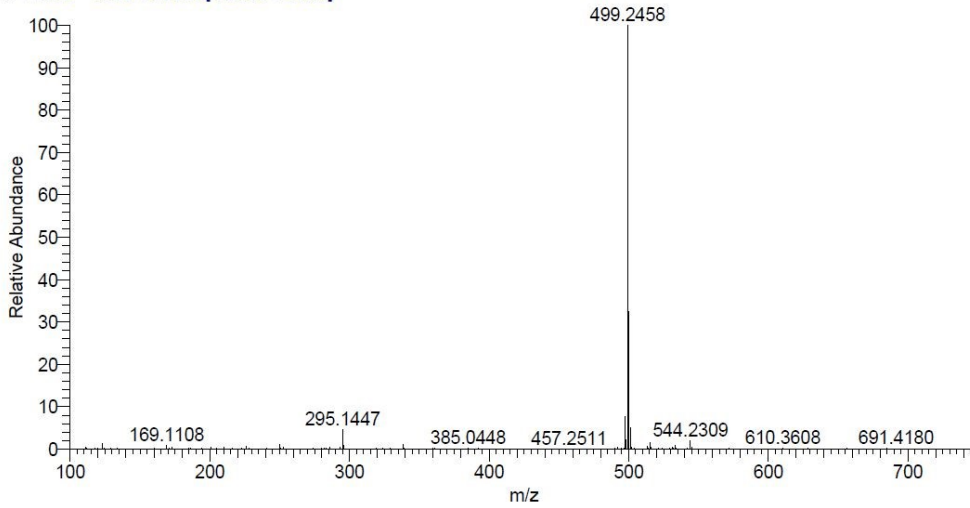

# HRMS Spectra of compound K1

|               |                  |              |             |                 |              |                        |                       |
|---------------|------------------|--------------|-------------|-----------------|--------------|------------------------|-----------------------|
| Sample Name   | kva-j-dhp5       | Position     | Vial 22     | Instrument Name | Instrument 1 | User Name              |                       |
| Inj Vol       | 1                | Inj Position |             | Sample Type     | Sample       | IRM Calibration Status | Some Ions Missed      |
| Data Filename | HRMS22I19MAY22.d | ACQ Method   | ISOCRATIC.m | Comment         |              | Acquired Time          | 5/19/2022 12:53:51 PM |

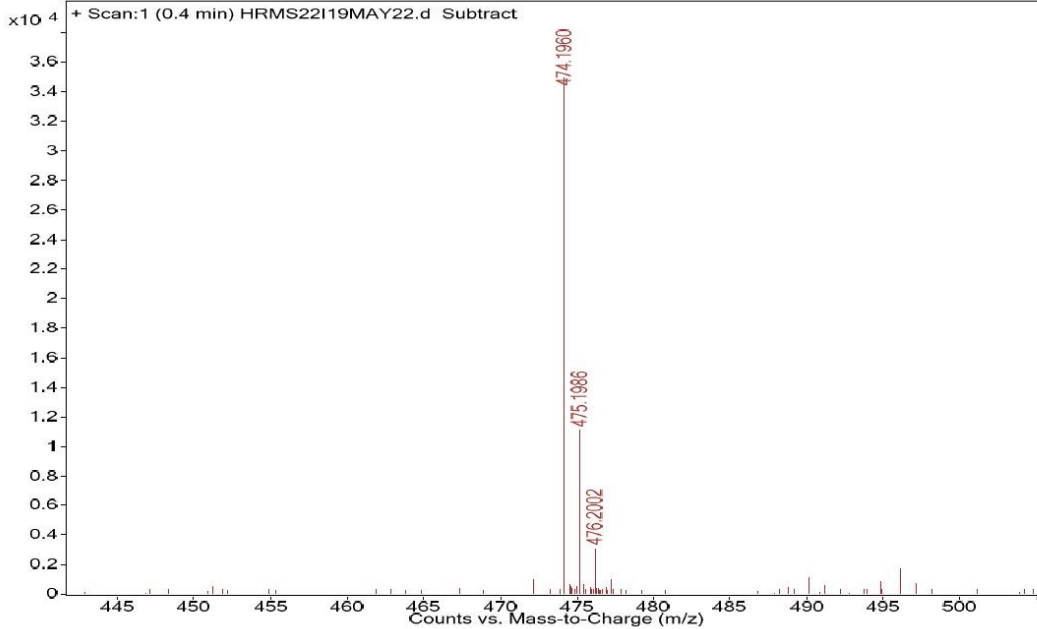

# HRMS Spectra of compound K2

D:\internals 2022\NOV22\HRMS22102NOV18

11/2/2022 11:46:29 AM

HRMS22102NOV18 #23 RT: 0.18 AV: 1 NL: 2.06E6  
T: FTMS + c ESI Full ms [100.00-750.00]

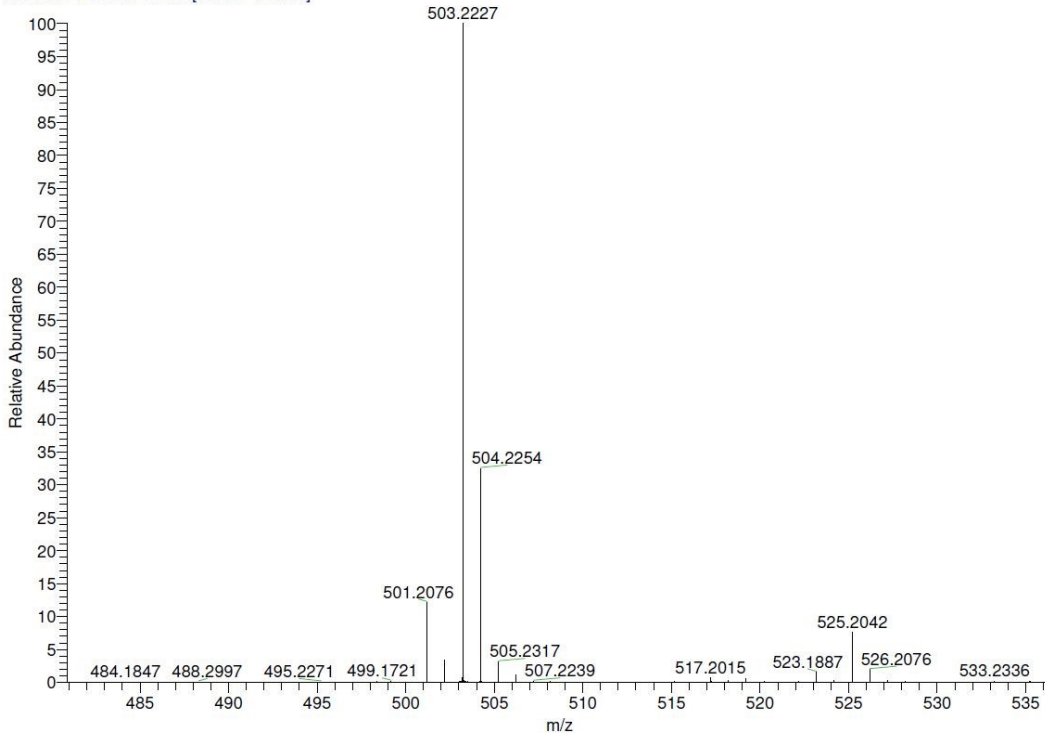

# HRMS Spectra of compound K3

| Sample Name   | kvaj-dhp2        | Position    | Vial 23     | Instrument Name | Instrument 1 | User Name              |                      |
|---------------|------------------|-------------|-------------|-----------------|--------------|------------------------|----------------------|
| Inj Vol       | 1                | InjPosition |             | SampleType      | Sample       | IRM Calibration Status | Some Ions Missed     |
| Data Filename | HRMS22120MAY23.d | ACQ Method  | ISOCRATIC.m | Comment         |              | Acquired Time          | 5/20/2022 1:12:50 PM |

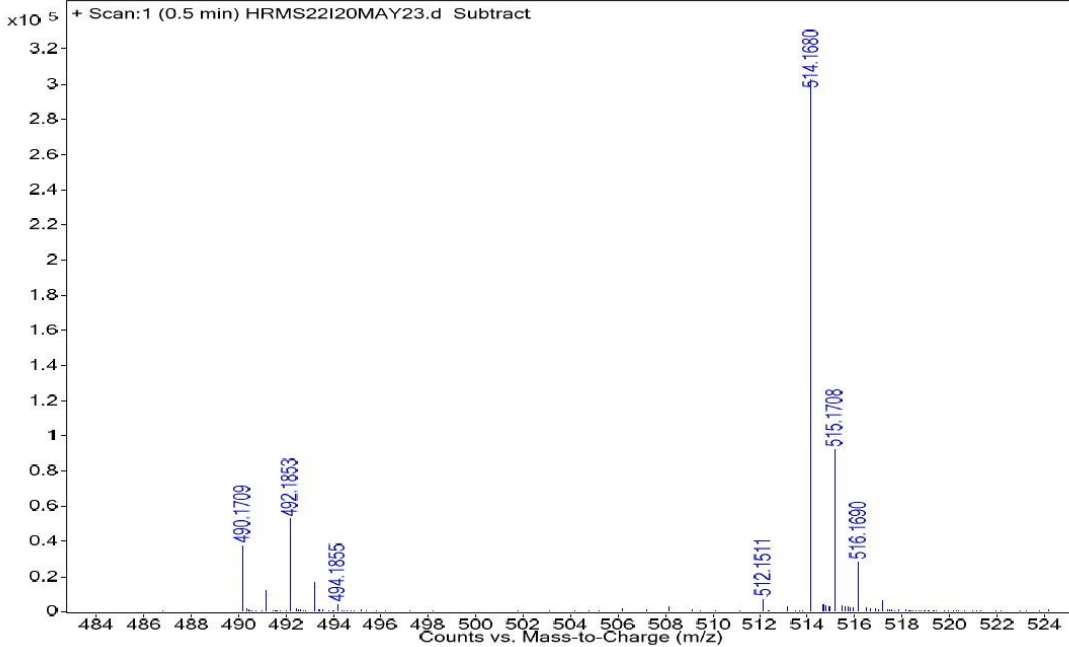

# HRMS Spectra of compound K4

D:\INTERNALS 2022\...HRMS22I26SEP07

9/26/2022 11:12:35 AM

KVAJ-DHP-7

HRMS22I26SEP07 #21 RT: 0.17 AV: 1 SB: 6 0.03-0.07 NL: 6.46E6  
T: FTMS + c ESI Full ms [100.00-750.00]

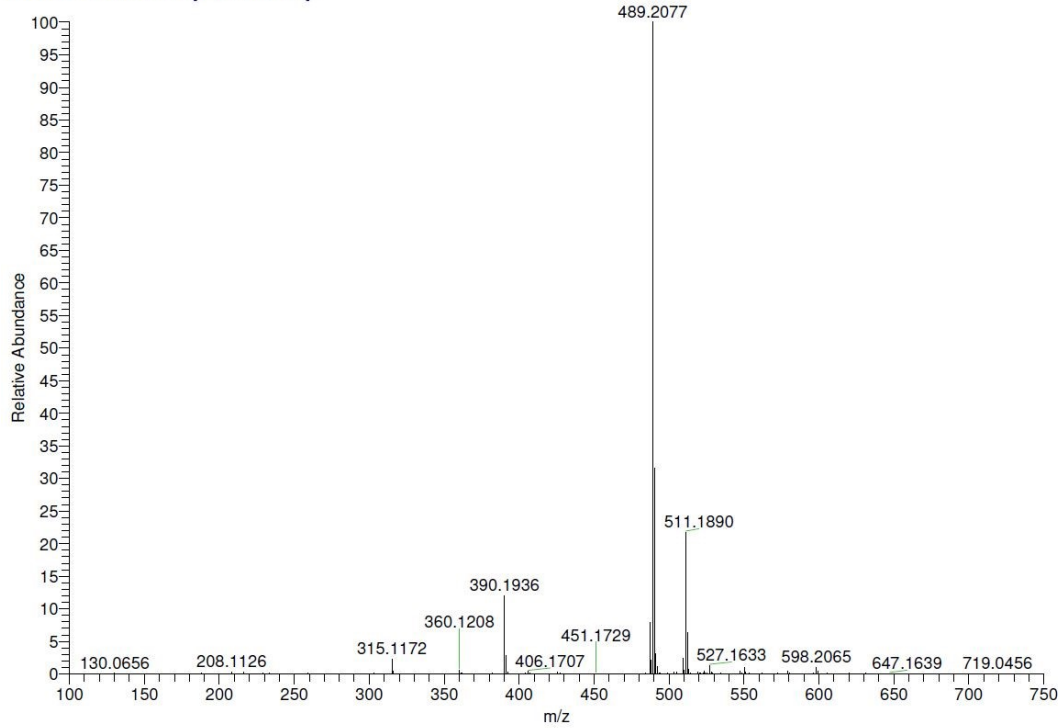

# HRMS Spectra of compound K5

D:\internals 2022\NOV22\HRMS22I01NOV21

11/1/2022 11:50:29 AM

HRMS22I01NOV21 #24 RT: 0.19 AV: 1 NL: 4.55E6  
T: FTMS + c ESI Full ms [100.00-750.00]

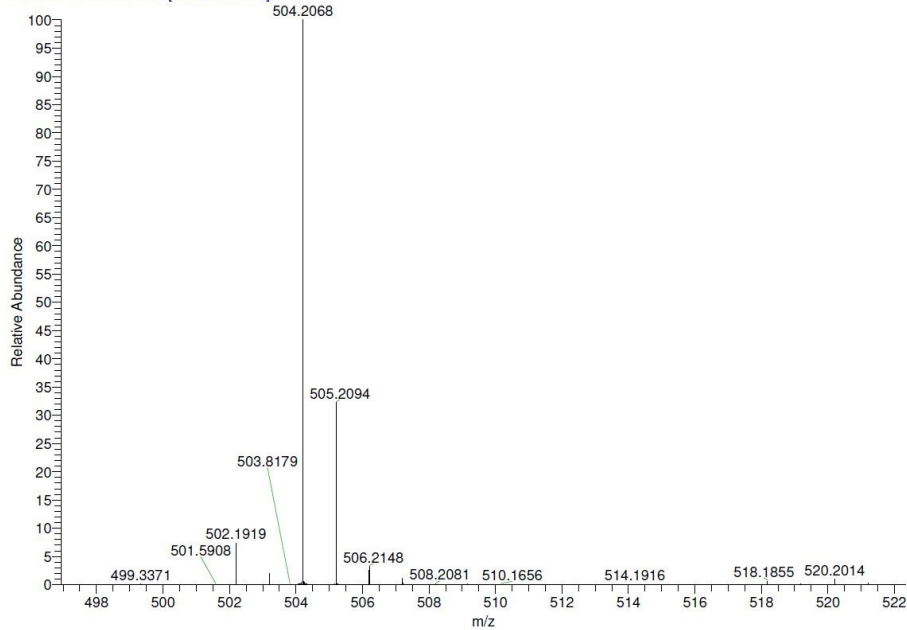

# HRMS Spectra of compound K6

D:\internals 2022\NOV22\HRMS22101NOV22

11/1/2022 11:52:26 AM

HRMS22101NOV22 #21 RT: 0.17 AV: 1 NL: 4.23E6  
T: FTMS + c ESI Full ms [100.00-750.00]

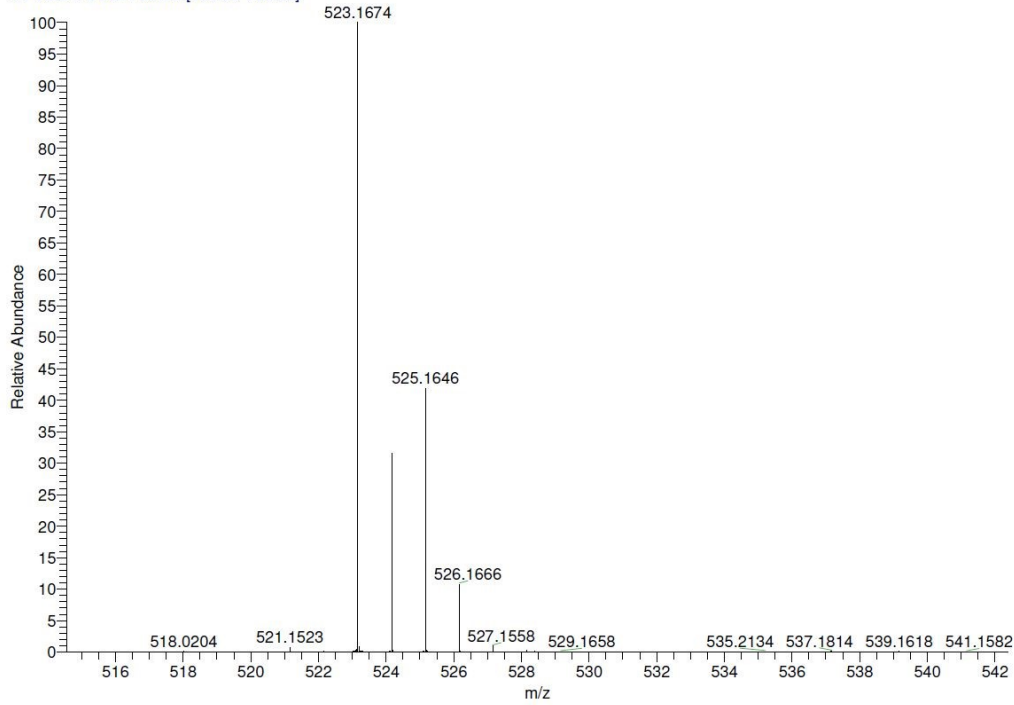

# HRMS Spectra of compound K7

D:\INTERNALS 2022\...HRMS22115SEP20

9/15/2022 11:30:02 AM

kvaj-dhp-26

HRMS22115SEP20 #25 RT: 0.19 AV: 1 SB: 7 0.02-0.07 NL: 4.83E5  
T: FTMS + c ESI Full ms [100.00-750.00]

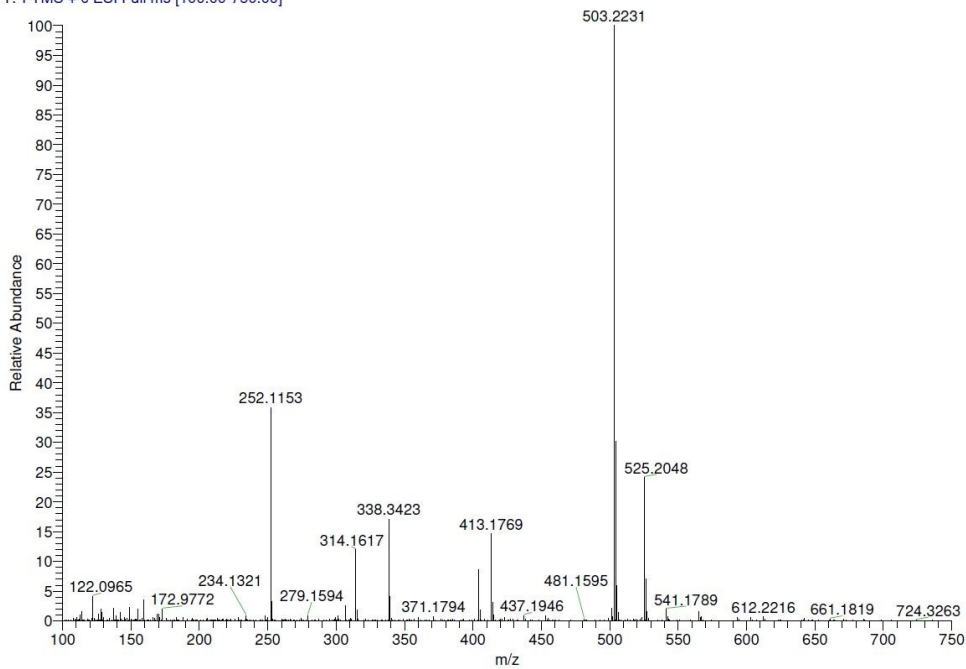

Supplement: d4md00377b1.pdf [file d4md00377b1.pdf]
